# Supplementary material
Source: publisher figshare collection journal article supplement (https://acs.figshare.com/ndownloader/files/4266367)
Supplement: Supplementary file 1 [file 4266367]

 
data_2 
 
_audit_creation_method            SHELXL-97 
_chemical_name_systematic 
; 
 ? 
; 
_chemical_name_common             ? 
_chemical_melting_point           ? 
_chemical_formula_moiety          ? 
_chemical_formula_sum 
 'C59 H44 N2 O17' 
_chemical_formula_weight          1052.96 
 
loop_ 
 _atom_type_symbol 
 _atom_type_description 
 _atom_type_scat_dispersion_real 
 _atom_type_scat_dispersion_imag 
 _atom_type_scat_source 
 'C'  'C'   0.0033   0.0016 
 'International Tables Vol C Tables 4.2.6.8 and 6.1.1.4' 
 'H'  'H'   0.0000   0.0000 
 'International Tables Vol C Tables 4.2.6.8 and 6.1.1.4' 
 'N'  'N'   0.0061   0.0033 
 'International Tables Vol C Tables 4.2.6.8 and 6.1.1.4' 
 'O'  'O'   0.0106   0.0060 
 'International Tables Vol C Tables 4.2.6.8 and 6.1.1.4' 
 
_symmetry_cell_setting            Triclinic 
_symmetry_space_group_name_H-M     P-1
 
loop_ 
 _symmetry_equiv_pos_as_xyz 
 'x, y, z' 
 '-x, -y, -z' 
 
_cell_length_a                    8.150(4) 
_cell_length_b                    12.611(6) 
_cell_length_c                    13.746(7) 
_cell_angle_alpha                 110.023(14) 
_cell_angle_beta                  105.456(15) 
_cell_angle_gamma                 98.199(15) 
_cell_volume                      1236.0(11) 
_cell_formula_units_Z             1 
_cell_measurement_temperature     293(2) 
_cell_measurement_reflns_used     4100  
_cell_measurement_theta_min       1.68  
_cell_measurement_theta_max       25.00 
 
_exptl_crystal_description       block  
_exptl_crystal_colour            dark-red 
_exptl_crystal_size_max           0.26 
_exptl_crystal_size_mid           0.16 
_exptl_crystal_size_min           0.13 
_exptl_crystal_density_meas       'not measured' 
_exptl_crystal_density_diffrn     1.415 
_exptl_crystal_density_method     'not measured' 
_exptl_crystal_F_000              548 
_exptl_absorpt_coefficient_mu     0.105 
_exptl_absorpt_correction_type    empirical 
_exptl_absorpt_correction_T_min   0.980
_exptl_absorpt_correction_T_max   0.986 
_exptl_absorpt_process_details    sadabs 
 
_exptl_special_details 
; 
 ? 
; 
 
_diffrn_ambient_temperature       293(2) 
_diffrn_radiation_wavelength      0.71073 
_diffrn_radiation_type            MoK\a 
_diffrn_radiation_source          'fine-focus sealed tube' 
_diffrn_radiation_monochromator   graphite 
_diffrn_measurement_device_type   'Bruker CCD APEX 2'  
_diffrn_measurement_method        'hemisphere' 
_diffrn_detector_area_resol_mean  ? 
_diffrn_standards_number          ? 
_diffrn_standards_interval_count  ? 
_diffrn_standards_interval_time   ? 
_diffrn_standards_decay_%         ? 
_diffrn_reflns_number             13602 
_diffrn_reflns_av_R_equivalents   0.1107 
_diffrn_reflns_av_sigmaI/netI     0.1539 
_diffrn_reflns_limit_h_min        -9 
_diffrn_reflns_limit_h_max        9 
_diffrn_reflns_limit_k_min        -14 
_diffrn_reflns_limit_k_max        14 
_diffrn_reflns_limit_l_min        -16 
_diffrn_reflns_limit_l_max        16 
_diffrn_reflns_theta_min          1.68 
_diffrn_reflns_theta_max          25.00 
_reflns_number_total              4100 
_reflns_number_gt                 1578 
_reflns_threshold_expression      >2sigma(I) 
 
_computing_data_collection        ? 
_computing_cell_refinement        ? 
_computing_data_reduction         ? 
_computing_structure_solution     'SHELXS-97 (Sheldrick, 1990)' 
_computing_structure_refinement   'SHELXL-97 (Sheldrick, 1997)' 
_computing_molecular_graphics     ? 
_computing_publication_material   ? 
 
_refine_special_details 
; 
 Refinement of F^2^ against ALL reflections.  The weighted R-factor wR and 
 goodness of fit S are based on F^2^, conventional R-factors R are based 
 on F, with F set to zero for negative F^2^. The threshold expression of 
 F^2^ > 2sigma(F^2^) is used only for calculating R-factors(gt) etc. and is 
 not relevant to the choice of reflections for refinement.  R-factors based 
 on F^2^ are statistically about twice as large as those based on F, and R- 
 factors based on ALL data will be even larger. 
; 
 
_refine_ls_structure_factor_coef  Fsqd  
_refine_ls_matrix_type            full 
_refine_ls_weighting_scheme       calc  
_refine_ls_weighting_details 
 'calc w=1/[\s^2^(Fo^2^)+(0.0988P)^2^+0.0000P] where P=(Fo^2^+2Fc^2^)/3' 
_atom_sites_solution_primary      direct 
_atom_sites_solution_secondary    difmap 
_atom_sites_solution_hydrogens    geom 
_refine_ls_hydrogen_treatment     constr 
_refine_ls_extinction_method      none 
_refine_ls_extinction_coef        ? 
_refine_ls_number_reflns          4100 
_refine_ls_number_parameters      343 
_refine_ls_number_restraints      0 
_refine_ls_R_factor_all           0.1886 
_refine_ls_R_factor_gt            0.0710 
_refine_ls_wR_factor_ref          0.1852 
_refine_ls_wR_factor_gt           0.1395 
_refine_ls_goodness_of_fit_ref    0.785 
_refine_ls_restrained_S_all       0.785 
_refine_ls_shift/su_max           0.026 
_refine_ls_shift/su_mean          0.005 
 
loop_ 
 _atom_site_label 
 _atom_site_type_symbol 
 _atom_site_fract_x 
 _atom_site_fract_y 
 _atom_site_fract_z 
 _atom_site_U_iso_or_equiv 
 _atom_site_adp_type 
 _atom_site_occupancy 
 _atom_site_symmetry_multiplicity 
 _atom_site_calc_flag 
 _atom_site_refinement_flags 
 _atom_site_disorder_assembly 
 _atom_site_disorder_group 
N1 N 0.1304(5) 0.6811(3) 0.2759(4) 0.0647(12) Uani 1 1 d . . . 
H1N H 0.1543 0.6250 0.2297 0.078 Uiso 1 1 calc R . . 
C24 C 0.0284(6) 0.9561(4) 0.5074(3) 0.0549(13) Uani 1 1 d . . . 
H24 H 0.0517 0.9552 0.5771 0.066 Uiso 1 1 calc R . . 
C31 C 0.4737(6) 1.0831(4) 0.5890(4) 0.0625(14) Uani 1 1 d . . . 
C36 C 0.5635(6) 0.9061(4) 0.5118(5) 0.0657(14) Uani 1 1 d . . . 
C38 C 0.5376(7) 0.9879(5) 0.5995(4) 0.0708(15) Uani 1 1 d . . . 
H38 H 0.5625 0.9800 0.6664 0.085 Uiso 1 1 calc R . . 
C33 C 0.3883(9) 1.2611(7) 0.6626(9) 0.137(4) Uani 1 1 d . . . 
H33 H 0.3723 1.3180 0.7210 0.164 Uiso 1 1 calc R . . 
C32 C 0.4487(8) 1.1697(6) 0.6778(5) 0.102(2) Uani 1 1 d . . . 
H32 H 0.4730 1.1648 0.7459 0.123 Uiso 1 1 calc R . . 
C35 C 0.6257(8) 0.8077(6) 0.5207(6) 0.104(2) Uani 1 1 d . . . 
H35 H 0.6505 0.7986 0.5869 0.124 Uiso 1 1 calc R . . 
C39 C 0.6481(11) 0.7303(7) 0.4355(10) 0.135(3) Uani 1 1 d . . . 
H39 H 0.6902 0.6679 0.4434 0.162 Uiso 1 1 calc R . . 
C1 C -0.0885(5) 0.2266(3) 0.0587(3) 0.0388(10) Uani 1 1 d . . . 
O3 O 0.2377(4) 0.4775(3) 0.1719(2) 0.0561(9) Uani 1 1 d . . . 
O8 O -0.2526(5) 0.5163(3) 0.0154(3) 0.0735(11) Uani 1 1 d . . . 
H8 H -0.2375 0.5269 -0.0376 0.110 Uiso 1 1 calc R . . 
O4 O 0.1909(4) 0.3926(3) 0.2824(3) 0.0611(9) Uani 1 1 d . . . 
C9 C -0.1877(5) 0.2955(3) 0.1245(3) 0.0419(11) Uani 1 1 d . . . 
O1 O -0.4177(4) -0.0333(2) -0.1524(2) 0.0596(9) Uani 1 1 d . . . 
H1 H -0.5249 -0.0565 -0.1703 0.089 Uiso 1 1 calc R . . 
O2 O -0.4628(4) 0.1192(3) -0.0337(3) 0.0802(11) Uani 1 1 d . . . 
O6 O -0.2272(4) 0.1039(3) 0.2541(2) 0.0577(9) Uani 1 1 d . . . 
O5 O 0.0365(4) 0.2061(3) 0.2832(2) 0.0642(9) Uani 1 1 d . . . 
H5O H 0.0797 0.2672 0.2803 0.096 Uiso 1 1 calc R . . 
C14 C -0.2555(5) 0.3851(3) 0.1009(3) 0.0399(11) Uani 1 1 d . . . 
C6 C 0.0939(5) 0.2757(3) 0.0908(3) 0.0380(10) Uani 1 1 d . . . 
C2 C -0.1702(5) 0.1204(3) -0.0310(3) 0.0377(10) Uani 1 1 d . . . 
C13 C -0.3467(6) 0.4459(4) 0.1640(4) 0.0495(12) Uani 1 1 d . . . 
H13 H -0.3892 0.5053 0.1491 0.059 Uiso 1 1 calc R . . 
C11 C -0.3073(6) 0.3329(4) 0.2729(4) 0.0566(13) Uani 1 1 d . . . 
H11 H -0.3264 0.3147 0.3297 0.068 Uiso 1 1 calc R . . 
O7 O -0.2036(5) 0.3485(3) -0.0679(3) 0.0852(13) Uani 1 1 d . . . 
C10 C -0.2118(5) 0.2738(3) 0.2131(3) 0.0423(11) Uani 1 1 d . . . 
C5 C 0.1927(6) 0.2166(4) 0.0328(3) 0.0471(12) Uani 1 1 d . . . 
H5 H 0.3131 0.2484 0.0538 0.057 Uiso 1 1 calc R . . 
C7 C -0.3617(6) 0.0703(4) -0.0697(4) 0.0475(12) Uani 1 1 d . . . 
C12 C -0.3744(6) 0.4191(4) 0.2478(4) 0.0569(13) Uani 1 1 d . . . 
H12 H -0.4384 0.4587 0.2880 0.068 Uiso 1 1 calc R . . 
C16 C -0.1345(7) 0.1861(4) 0.2499(3) 0.0497(12) Uani 1 1 d . . . 
C4 C 0.1121(6) 0.1116(4) -0.0554(4) 0.0499(12) Uani 1 1 d . . . 
H4 H 0.1782 0.0723 -0.0939 0.060 Uiso 1 1 calc R . . 
C3 C -0.0661(6) 0.0639(4) -0.0871(3) 0.0463(11) Uani 1 1 d . . . 
H3 H -0.1186 -0.0073 -0.1471 0.056 Uiso 1 1 calc R . . 
C8 C 0.1805(5) 0.3896(4) 0.1873(4) 0.0434(11) Uani 1 1 d . . . 
C15 C -0.2337(6) 0.4121(4) 0.0088(4) 0.0479(12) Uani 1 1 d . . . 
C19 C 0.0579(6) 0.8600(4) 0.4236(3) 0.0508(12) Uani 1 1 d . . . 
C18 C 0.1240(7) 0.7732(4) 0.4512(4) 0.0660(15) Uani 1 1 d . . . 
H18 H 0.1439 0.7757 0.5219 0.079 Uiso 1 1 calc R . . 
C20 C 0.0283(7) 0.8495(4) 0.3175(4) 0.0647(14) Uani 1 1 d . . . 
H20 H -0.0181 0.9038 0.2950 0.078 Uiso 1 1 calc R . . 
C21 C 0.0664(7) 0.7594(5) 0.2437(4) 0.0722(15) Uani 1 1 d . . . 
H21 H 0.0475 0.7533 0.1720 0.087 Uiso 1 1 calc R . . 
C17 C 0.1584(7) 0.6874(4) 0.3767(5) 0.0693(15) Uani 1 1 d . . . 
H17 H 0.2029 0.6309 0.3964 0.083 Uiso 1 1 calc R . . 
 
loop_ 
 _atom_site_aniso_label 
 _atom_site_aniso_U_11 
 _atom_site_aniso_U_22 
 _atom_site_aniso_U_33 
 _atom_site_aniso_U_23 
 _atom_site_aniso_U_13 
 _atom_site_aniso_U_12 
N1 0.074(3) 0.042(2) 0.081(3) 0.015(2) 0.035(2) 0.034(2) 
C24 0.070(3) 0.058(3) 0.045(2) 0.020(2) 0.023(2) 0.037(3) 
C31 0.056(3) 0.059(3) 0.054(3) 0.007(3) 0.015(2) 0.010(3) 
C36 0.057(3) 0.052(3) 0.077(4) 0.022(3) 0.010(3) 0.014(3) 
C38 0.074(4) 0.073(4) 0.069(4) 0.039(3) 0.017(3) 0.017(3) 
C33 0.075(5) 0.078(5) 0.181(9) -0.025(6) 0.018(6) 0.032(4) 
C32 0.071(4) 0.101(5) 0.084(4) -0.009(4) 0.016(3) 0.010(4) 
C35 0.092(5) 0.071(4) 0.134(6) 0.041(4) 0.013(4) 0.030(4) 
C39 0.107(6) 0.069(5) 0.182(9) 0.024(7) 0.004(6) 0.037(4) 
C1 0.050(3) 0.036(3) 0.045(2) 0.024(2) 0.021(2) 0.022(2) 
O3 0.075(2) 0.0359(19) 0.067(2) 0.0259(16) 0.0285(17) 0.0212(17) 
O8 0.125(3) 0.046(2) 0.088(2) 0.0405(18) 0.062(2) 0.050(2) 
O4 0.072(2) 0.060(2) 0.055(2) 0.0234(17) 0.0247(17) 0.0194(18) 
C9 0.044(3) 0.039(3) 0.048(3) 0.018(2) 0.017(2) 0.022(2) 
O1 0.054(2) 0.0494(19) 0.068(2) 0.0134(17) 0.0238(16) 0.0117(16) 
O2 0.051(2) 0.067(2) 0.097(3) 0.001(2) 0.0257(19) 0.0185(18) 
O6 0.063(2) 0.049(2) 0.069(2) 0.0333(18) 0.0217(17) 0.0154(18) 
O5 0.058(2) 0.067(2) 0.088(2) 0.0503(19) 0.0228(18) 0.0301(18) 
C14 0.045(3) 0.036(2) 0.040(2) 0.014(2) 0.014(2) 0.021(2) 
C6 0.044(3) 0.030(2) 0.053(3) 0.024(2) 0.022(2) 0.019(2) 
C2 0.049(3) 0.031(2) 0.045(2) 0.022(2) 0.019(2) 0.022(2) 
C13 0.057(3) 0.042(3) 0.059(3) 0.020(2) 0.024(2) 0.030(2) 
C11 0.063(3) 0.061(3) 0.055(3) 0.024(2) 0.030(2) 0.025(3) 
O7 0.165(4) 0.073(2) 0.067(2) 0.045(2) 0.067(2) 0.077(3) 
C10 0.046(3) 0.037(3) 0.051(3) 0.021(2) 0.019(2) 0.015(2) 
C5 0.048(3) 0.035(3) 0.065(3) 0.026(2) 0.020(2) 0.017(2) 
C7 0.052(3) 0.037(3) 0.058(3) 0.020(2) 0.022(2) 0.017(2) 
C12 0.063(3) 0.055(3) 0.064(3) 0.021(3) 0.033(3) 0.034(3) 
C16 0.057(3) 0.049(3) 0.052(3) 0.026(2) 0.022(3) 0.021(3) 
C4 0.050(3) 0.047(3) 0.067(3) 0.026(3) 0.029(2) 0.027(2) 
C3 0.060(3) 0.034(2) 0.057(3) 0.025(2) 0.023(2) 0.023(2) 
C8 0.042(3) 0.050(3) 0.053(3) 0.027(3) 0.025(2) 0.024(2) 
C15 0.056(3) 0.040(3) 0.053(3) 0.021(2) 0.018(2) 0.023(2) 
C19 0.064(3) 0.054(3) 0.044(3) 0.019(2) 0.028(2) 0.027(3) 
C18 0.098(4) 0.059(3) 0.059(3) 0.024(3) 0.037(3) 0.054(3) 
C20 0.090(4) 0.059(3) 0.064(3) 0.025(3) 0.038(3) 0.048(3) 
C21 0.093(4) 0.071(4) 0.061(3) 0.022(3) 0.039(3) 0.032(3) 
C17 0.095(4) 0.058(3) 0.072(4) 0.032(3) 0.035(3) 0.043(3) 
 
_geom_special_details 
; 
 All esds (except the esd in the dihedral angle between two l.s. planes) 
 are estimated using the full covariance matrix.  The cell esds are taken 
 into account individually in the estimation of esds in distances, angles 
 and torsion angles; correlations between esds in cell parameters are only 
 used when they are defined by crystal symmetry.  An approximate (isotropic) 
 treatment of cell esds is used for estimating esds involving l.s. planes. 
; 
 
loop_ 
 _geom_bond_atom_site_label_1 
 _geom_bond_atom_site_label_2 
 _geom_bond_distance 
 _geom_bond_site_symmetry_2 
 _geom_bond_publ_flag 
N1 C17 1.315(6) . ? 
N1 C21 1.328(6) . ? 
C24 C24 1.317(8) 2_576 ? 
C24 C19 1.459(6) . ? 
C31 C36 1.396(7) 2_676 ? 
C31 C38 1.411(7) . ? 
C31 C32 1.417(7) . ? 
C36 C38 1.382(7) . ? 
C36 C31 1.396(7) 2_676 ? 
C36 C35 1.436(7) . ? 
C33 C39 1.347(11) 2_676 ? 
C33 C32 1.373(10) . ? 
C35 C39 1.319(10) . ? 
C39 C33 1.347(11) 2_676 ? 
C1 C2 1.391(5) . ? 
C1 C6 1.410(5) . ? 
C1 C9 1.509(5) . ? 
O3 C8 1.248(5) . ? 
O8 C15 1.321(5) . ? 
O4 C8 1.275(5) . ? 
C9 C10 1.393(6) . ? 
C9 C14 1.421(5) . ? 
O1 C7 1.321(5) . ? 
O2 C7 1.208(5) . ? 
O6 C16 1.221(5) . ? 
O5 C16 1.302(5) . ? 
C14 C13 1.395(5) . ? 
C14 C15 1.465(6) . ? 
C6 C5 1.395(5) . ? 
C6 C8 1.493(6) . ? 
C2 C3 1.403(5) . ? 
C2 C7 1.470(6) . ? 
C13 C12 1.369(6) . ? 
C11 C10 1.386(6) . ? 
C11 C12 1.388(6) . ? 
O7 C15 1.196(5) . ? 
C10 C16 1.513(6) . ? 
C5 C4 1.372(5) . ? 
C4 C3 1.376(6) . ? 
C19 C20 1.368(6) . ? 
C19 C18 1.406(6) . ? 
C18 C17 1.334(6) . ? 
C20 C21 1.377(6) . ? 
 
loop_ 
 _geom_angle_atom_site_label_1 
 _geom_angle_atom_site_label_2 
 _geom_angle_atom_site_label_3 
 _geom_angle 
 _geom_angle_site_symmetry_1 
 _geom_angle_site_symmetry_3 
 _geom_angle_publ_flag 
C17 N1 C21 121.7(4) . . ? 
C24 C24 C19 125.4(5) 2_576 . ? 
C36 C31 C38 119.0(4) 2_676 . ? 
C36 C31 C32 118.5(6) 2_676 . ? 
C38 C31 C32 122.4(6) . . ? 
C38 C36 C31 120.0(5) . 2_676 ? 
C38 C36 C35 121.6(6) . . ? 
C31 C36 C35 118.4(6) 2_676 . ? 
C36 C38 C31 120.9(5) . . ? 
C39 C33 C32 121.1(8) 2_676 . ? 
C33 C32 C31 119.5(7) . . ? 
C39 C35 C36 120.5(7) . . ? 
C35 C39 C33 121.9(8) . 2_676 ? 
C2 C1 C6 120.3(4) . . ? 
C2 C1 C9 122.7(4) . . ? 
C6 C1 C9 116.9(3) . . ? 
C10 C9 C14 117.9(4) . . ? 
C10 C9 C1 119.9(3) . . ? 
C14 C9 C1 122.3(4) . . ? 
C13 C14 C9 119.9(4) . . ? 
C13 C14 C15 119.8(4) . . ? 
C9 C14 C15 120.3(4) . . ? 
C5 C6 C1 119.7(4) . . ? 
C5 C6 C8 120.4(4) . . ? 
C1 C6 C8 119.9(3) . . ? 
C1 C2 C3 118.2(4) . . ? 
C1 C2 C7 121.4(4) . . ? 
C3 C2 C7 120.4(4) . . ? 
C12 C13 C14 120.8(4) . . ? 
C10 C11 C12 120.0(4) . . ? 
C11 C10 C9 121.2(4) . . ? 
C11 C10 C16 116.6(4) . . ? 
C9 C10 C16 122.1(4) . . ? 
C4 C5 C6 119.9(4) . . ? 
O2 C7 O1 121.5(4) . . ? 
O2 C7 C2 124.4(4) . . ? 
O1 C7 C2 114.0(4) . . ? 
C13 C12 C11 120.1(4) . . ? 
O6 C16 O5 121.3(4) . . ? 
O6 C16 C10 121.6(4) . . ? 
O5 C16 C10 117.0(5) . . ? 
C5 C4 C3 120.4(4) . . ? 
C4 C3 C2 121.5(4) . . ? 
O3 C8 O4 122.8(4) . . ? 
O3 C8 C6 119.2(4) . . ? 
O4 C8 C6 117.9(4) . . ? 
O7 C15 O8 120.4(4) . . ? 
O7 C15 C14 125.7(4) . . ? 
O8 C15 C14 113.9(4) . . ? 
C20 C19 C18 116.6(4) . . ? 
C20 C19 C24 123.7(4) . . ? 
C18 C19 C24 119.7(4) . . ? 
C17 C18 C19 120.4(4) . . ? 
C19 C20 C21 120.8(5) . . ? 
N1 C21 C20 119.3(5) . . ? 
N1 C17 C18 121.2(5) . . ? 
 
_diffrn_measured_fraction_theta_max    0.941 
_diffrn_reflns_theta_full              25.00 
_diffrn_measured_fraction_theta_full   0.941 
_refine_diff_density_max    0.219 
_refine_diff_density_min   -0.203 
_refine_diff_density_rms    0.051 

 

data_3 
 
_audit_creation_method            SHELXL-97 
_chemical_name_systematic 
; 
 ? 
; 
_chemical_name_common             ? 
_chemical_melting_point           ? 
_chemical_formula_moiety          ? 
_chemical_formula_sum 
 'C59 H44 N2 O17' 
_chemical_formula_weight          1052.95 
 
loop_ 
 _atom_type_symbol 
 _atom_type_description 
 _atom_type_scat_dispersion_real 
 _atom_type_scat_dispersion_imag 
 _atom_type_scat_source 
 'C'  'C'   0.0033   0.0016 
 'International Tables Vol C Tables 4.2.6.8 and 6.1.1.4' 
 'H'  'H'   0.0000   0.0000 
 'International Tables Vol C Tables 4.2.6.8 and 6.1.1.4' 
 'N'  'N'   0.0061   0.0033 
 'International Tables Vol C Tables 4.2.6.8 and 6.1.1.4' 
 'O'  'O'   0.0106   0.0060 
 'International Tables Vol C Tables 4.2.6.8 and 6.1.1.4' 
 
_symmetry_cell_setting             Triclinic 
_symmetry_space_group_name_H-M     P-1  
 
loop_ 
 _symmetry_equiv_pos_as_xyz 
 'x, y, z' 
 '-x, -y, -z' 
 
_cell_length_a                    8.154(3) 
_cell_length_b                    13.877(5) 
_cell_length_c                    22.904(9) 
_cell_angle_alpha                 82.541(11) 
_cell_angle_beta                  87.688(12) 
_cell_angle_gamma                 73.624(12) 
_cell_volume                      2465.4(16) 
_cell_formula_units_Z             2 
_cell_measurement_temperature     293(2) 
_cell_measurement_reflns_used     9055  
_cell_measurement_theta_min       0.90  
_cell_measurement_theta_max       25.50 
 
_exptl_crystal_description       plate 
_exptl_crystal_colour            orange 
_exptl_crystal_size_max           0.22 
_exptl_crystal_size_mid           0.14 
_exptl_crystal_size_min           0.12 
_exptl_crystal_density_meas       'not measured' 
_exptl_crystal_density_diffrn     1.418 
_exptl_crystal_density_method     'not measured' 
_exptl_crystal_F_000              1096 
_exptl_absorpt_coefficient_mu     0.105 
_exptl_absorpt_correction_type    empirical  
_exptl_absorpt_correction_T_min   0.983
_exptl_absorpt_correction_T_max   0.987 
_exptl_absorpt_process_details    sadabs  
 
_exptl_special_details 
; 
 ? 
; 
 
_diffrn_ambient_temperature       293(2) 
_diffrn_radiation_wavelength      0.71073 
_diffrn_radiation_type            MoK\a 
_diffrn_radiation_source          'fine-focus sealed tube' 
_diffrn_radiation_monochromator   graphite 
_diffrn_measurement_device_type   'Bruker CCD APEX 2' 
_diffrn_measurement_method        'hemisphere'
_diffrn_detector_area_resol_mean  ? 
_diffrn_standards_number          ? 
_diffrn_standards_interval_count  ? 
_diffrn_standards_interval_time   ? 
_diffrn_standards_decay_%         ? 
_diffrn_reflns_number             9055 
_diffrn_reflns_av_R_equivalents   0.0000 
_diffrn_reflns_av_sigmaI/netI     0.1033 
_diffrn_reflns_limit_h_min        -9 
_diffrn_reflns_limit_h_max        9 
_diffrn_reflns_limit_k_min        -16 
_diffrn_reflns_limit_k_max        16 
_diffrn_reflns_limit_l_min        0 
_diffrn_reflns_limit_l_max        27 
_diffrn_reflns_theta_min          0.90 
_diffrn_reflns_theta_max          25.50 
_reflns_number_total              9055 
_reflns_number_gt                 4128 
_reflns_threshold_expression      >2sigma(I) 
 
_computing_data_collection        ? 
_computing_cell_refinement        ? 
_computing_data_reduction         ? 
_computing_structure_solution     'SHELXS-97 (Sheldrick, 1990)' 
_computing_structure_refinement   'SHELXL-97 (Sheldrick, 1997)' 
_computing_molecular_graphics     ? 
_computing_publication_material   ? 
 
_refine_special_details 
; 
 Refinement of F^2^ against ALL reflections.  The weighted R-factor wR and 
 goodness of fit S are based on F^2^, conventional R-factors R are based 
 on F, with F set to zero for negative F^2^. The threshold expression of 
 F^2^ > 2sigma(F^2^) is used only for calculating R-factors(gt) etc. and is 
 not relevant to the choice of reflections for refinement.  R-factors based 
 on F^2^ are statistically about twice as large as those based on F, and R- 
 factors based on ALL data will be even larger. 
; 
 
_refine_ls_structure_factor_coef  Fsqd  
_refine_ls_matrix_type            full 
_refine_ls_weighting_scheme       calc  
_refine_ls_weighting_details 
 'calc w=1/[\s^2^(Fo^2^)+(0.1000P)^2^+0.0000P] where P=(Fo^2^+2Fc^2^)/3' 
_atom_sites_solution_primary      direct 
_atom_sites_solution_secondary    difmap 
_atom_sites_solution_hydrogens    geom 
_refine_ls_hydrogen_treatment     mixed 
_refine_ls_extinction_method      none 
_refine_ls_extinction_coef        ? 
_refine_ls_number_reflns          9055 
_refine_ls_number_parameters      694 
_refine_ls_number_restraints      0 
_refine_ls_R_factor_all           0.1761 
_refine_ls_R_factor_gt            0.0801 
_refine_ls_wR_factor_ref          0.2350 
_refine_ls_wR_factor_gt           0.2014 
_refine_ls_goodness_of_fit_ref    1.060 
_refine_ls_restrained_S_all       1.060 
_refine_ls_shift/su_max           0.031 
_refine_ls_shift/su_mean          0.003 
 
loop_ 
 _atom_site_label 
 _atom_site_type_symbol 
 _atom_site_fract_x 
 _atom_site_fract_y 
 _atom_site_fract_z 
 _atom_site_U_iso_or_equiv 
 _atom_site_adp_type 
 _atom_site_occupancy 
 _atom_site_symmetry_multiplicity 
 _atom_site_calc_flag 
 _atom_site_refinement_flags 
 _atom_site_disorder_assembly 
 _atom_site_disorder_group 
O11 O 1.3716(5) 0.0132(2) 0.42686(14) 0.0755(12) Uani 1 1 d . . . 
O12 O 1.2288(4) 0.0050(2) 0.50854(13) 0.0629(10) Uani 1 1 d . . . 
H12O H 1.311(5) -0.067(3) 0.5098(16) 0.050 Uiso 1 1 d . . . 
O13 O 1.2861(5) 0.4325(2) 0.36026(13) 0.0549(9) Uani 1 1 d . . . 
H13O H 1.337(6) 0.408(3) 0.3864(19) 0.050 Uiso 1 1 d . . . 
O14 O 1.0505(4) 0.4527(2) 0.31109(13) 0.0538(9) Uani 1 1 d . . . 
C11 C 1.2083(5) 0.2296(3) 0.40477(15) 0.0309(9) Uani 1 1 d . . . 
C12 C 1.1606(5) 0.1614(3) 0.44823(16) 0.0341(10) Uani 1 1 d . . . 
C13 C 1.0101(5) 0.1939(3) 0.48033(17) 0.0405(11) Uani 1 1 d . . . 
H13 H 0.9803 0.1490 0.5098 0.049 Uiso 1 1 calc R . . 
C14 C 0.9061(5) 0.2901(3) 0.46938(18) 0.0489(12) Uani 1 1 d . . . 
H14 H 0.8053 0.3100 0.4907 0.059 Uiso 1 1 calc R . . 
C15 C 0.9506(5) 0.3576(3) 0.42682(18) 0.0471(12) Uani 1 1 d . . . 
H15 H 0.8791 0.4230 0.4189 0.057 Uiso 1 1 calc R . . 
C16 C 1.1023(5) 0.3281(3) 0.39563(17) 0.0371(10) Uani 1 1 d . . . 
C17 C 1.2641(5) 0.0540(3) 0.45881(17) 0.0362(10) Uani 1 1 d . . . 
C18 C 1.1454(6) 0.4080(3) 0.35153(19) 0.0411(11) Uani 1 1 d . . . 
O21 O 1.4403(4) 0.3365(2) 0.45393(12) 0.0520(8) Uani 1 1 d . . . 
O22 O 1.5857(4) 0.1849(2) 0.49401(11) 0.0449(8) Uani 1 1 d . . . 
O23 O 1.0838(4) 0.1607(3) 0.31410(13) 0.0715(11) Uani 1 1 d . . . 
O24 O 1.2374(4) 0.1355(3) 0.23305(12) 0.0524(9) Uani 1 1 d . . . 
H24O H 1.160(6) 0.123(3) 0.2192(19) 0.050 Uiso 1 1 d . . . 
C21 C 1.3704(5) 0.1994(3) 0.36913(15) 0.0301(9) Uani 1 1 d . . . 
C22 C 1.5221(5) 0.2056(3) 0.39230(16) 0.0345(10) Uani 1 1 d . . . 
C23 C 1.6749(5) 0.1768(3) 0.36240(17) 0.0384(10) Uani 1 1 d . . . 
H23 H 1.7754 0.1800 0.3788 0.046 Uiso 1 1 calc R . . 
C24 C 1.6785(5) 0.1431(3) 0.30761(17) 0.0419(11) Uani 1 1 d . . . 
H24 H 1.7812 0.1241 0.2872 0.050 Uiso 1 1 calc R . . 
C25 C 1.5305(5) 0.1379(3) 0.28387(17) 0.0373(10) Uani 1 1 d . . . 
H25 H 1.5336 0.1153 0.2473 0.045 Uiso 1 1 calc R . . 
C26 C 1.3739(5) 0.1661(3) 0.31379(15) 0.0319(9) Uani 1 1 d . . . 
C27 C 1.5169(5) 0.2443(3) 0.45076(18) 0.0370(10) Uani 1 1 d . . . 
C28 C 1.2178(5) 0.1549(3) 0.28868(17) 0.0395(10) Uani 1 1 d . . . 
O31 O 1.3414(5) 0.4977(2) -0.08093(13) 0.0747(12) Uani 1 1 d . . . 
O32 O 1.2473(4) 0.5064(2) 0.01038(12) 0.0609(10) Uani 1 1 d . . . 
H32O H 1.319(5) 0.430(3) 0.0091(16) 0.050 Uiso 1 1 d . . . 
O33 O 1.0148(4) 0.9378(2) -0.19743(13) 0.0545(8) Uani 1 1 d . . . 
O34 O 1.2466(4) 0.9211(2) -0.14737(13) 0.0554(8) Uani 1 1 d . . . 
C31 C 1.1782(5) 0.7173(3) -0.10341(16) 0.0362(10) Uani 1 1 d . . . 
C32 C 1.1388(5) 0.6482(3) -0.05756(16) 0.0361(10) Uani 1 1 d . . . 
C33 C 0.9896(5) 0.6792(3) -0.02501(18) 0.0474(11) Uani 1 1 d . . . 
H33 H 0.9651 0.6346 0.0058 0.057 Uiso 1 1 calc R . . 
C34 C 0.8779(5) 0.7734(4) -0.03704(19) 0.0524(13) Uani 1 1 d . . . 
H34 H 0.7764 0.7914 -0.0159 0.063 Uiso 1 1 calc R . . 
C35 C 0.9174(5) 0.8416(3) -0.08104(19) 0.0486(12) Uani 1 1 d . . . 
H35 H 0.8424 0.9060 -0.0893 0.058 Uiso 1 1 calc R . . 
C36 C 1.0677(5) 0.8146(3) -0.11284(17) 0.0394(10) Uani 1 1 d . . . 
C37 C 1.2535(5) 0.5446(3) -0.04524(18) 0.0405(10) Uani 1 1 d . . . 
C38 C 1.1105(6) 0.8948(3) -0.15585(19) 0.0441(11) Uani 1 1 d . . . 
O41 O 1.0550(4) 0.6464(3) -0.19288(14) 0.0707(10) Uani 1 1 d . . . 
O42 O 1.2097(4) 0.6157(3) -0.27358(13) 0.0553(9) Uani 1 1 d . . . 
H42O H 1.126(6) 0.602(3) -0.2816(19) 0.050 Uiso 1 1 d . . . 
O43 O 1.4049(4) 0.8287(2) -0.05569(12) 0.0504(8) Uani 1 1 d . . . 
O44 O 1.5525(4) 0.6787(2) -0.01443(11) 0.0464(8) Uani 1 1 d . . . 
C41 C 1.3392(5) 0.6883(3) -0.13941(16) 0.0342(10) Uani 1 1 d . . . 
C42 C 1.4898(5) 0.6961(3) -0.11621(15) 0.0342(10) Uani 1 1 d . . . 
C43 C 1.6441(5) 0.6682(3) -0.14606(16) 0.0411(11) Uani 1 1 d . . . 
H43 H 1.7437 0.6732 -0.1299 0.049 Uiso 1 1 calc R . . 
C44 C 1.6489(5) 0.6329(3) -0.19988(17) 0.0410(11) Uani 1 1 d . . . 
H44 H 1.7519 0.6137 -0.2200 0.049 Uiso 1 1 calc R . . 
C45 C 1.5002(5) 0.6261(3) -0.22377(16) 0.0390(11) Uani 1 1 d . . . 
H45 H 1.5044 0.6033 -0.2604 0.047 Uiso 1 1 calc R . . 
C46 C 1.3433(5) 0.6526(3) -0.19412(15) 0.0331(10) Uani 1 1 d . . . 
C47 C 1.1889(5) 0.6392(3) -0.21891(17) 0.0387(10) Uani 1 1 d . . . 
C48 C 1.4829(5) 0.7378(3) -0.05820(17) 0.0393(10) Uani 1 1 d . . . 
N11A N 1.3739(5) 0.1802(4) 0.59491(17) 0.0586(12) Uani 1 1 d . . . 
H11N H 1.441(5) 0.160(3) 0.5684(18) 0.050 Uiso 1 1 d . . . 
C11A C 1.2970(6) 0.2757(4) 0.5955(2) 0.0642(14) Uani 1 1 d . . . 
H11A H 1.3192 0.3226 0.5656 0.077 Uiso 1 1 calc R . . 
C12A C 1.1834(6) 0.3087(4) 0.6394(2) 0.0612(14) Uani 1 1 d . . . 
H12A H 1.1299 0.3774 0.6394 0.073 Uiso 1 1 calc R . . 
C13A C 1.1489(5) 0.2393(3) 0.68382(17) 0.0434(11) Uani 1 1 d . . . 
C14A C 1.2305(6) 0.1385(3) 0.68086(19) 0.0557(13) Uani 1 1 d . . . 
H14A H 1.2099 0.0893 0.7095 0.067 Uiso 1 1 calc R . . 
C15A C 1.3420(6) 0.1109(4) 0.6357(2) 0.0643(15) Uani 1 1 d . . . 
H15A H 1.3960 0.0428 0.6337 0.077 Uiso 1 1 calc R . . 
C16A C 1.0317(5) 0.2764(3) 0.73102(18) 0.0458(11) Uani 1 1 d . . . 
H16A H 0.9755 0.3452 0.7277 0.055 Uiso 1 1 calc R . . 
N21A N 0.6559(5) 0.3116(4) 0.91440(17) 0.0604(12) Uani 1 1 d . . . 
H21N H 0.575(5) 0.331(3) 0.9470(18) 0.050 Uiso 1 1 d . . . 
C21A C 0.6809(6) 0.3816(4) 0.8724(2) 0.0652(15) Uani 1 1 d . . . 
H21A H 0.6212 0.4493 0.8731 0.078 Uiso 1 1 calc R . . 
C22A C 0.7943(6) 0.3535(3) 0.8285(2) 0.0570(13) Uani 1 1 d . . . 
H22A H 0.8122 0.4026 0.7992 0.068 Uiso 1 1 calc R . . 
C23A C 0.8832(6) 0.2537(3) 0.82645(18) 0.0481(12) Uani 1 1 d . . . 
C24A C 0.8556(6) 0.1833(4) 0.8724(2) 0.0637(14) Uani 1 1 d . . . 
H24A H 0.9145 0.1151 0.8734 0.076 Uiso 1 1 calc R . . 
C25A C 0.7408(7) 0.2158(4) 0.9159(2) 0.0663(15) Uani 1 1 d . . . 
H25A H 0.7229 0.1694 0.9469 0.080 Uiso 1 1 calc R . . 
C26A C 1.0001(6) 0.2183(3) 0.77834(19) 0.0505(12) Uani 1 1 d . . . 
H26A H 1.0566 0.1495 0.7813 0.061 Uiso 1 1 calc R . . 
C101 C 1.4893(5) 0.8152(3) 0.21125(14) 0.0693(15) Uani 1 1 d G . . 
C102 C 1.6009(6) 0.7314(3) 0.1900(2) 0.094(2) Uani 1 1 d G . . 
C103 C 1.6870(5) 0.7430(4) 0.1371(2) 0.152(4) Uani 1 1 d G . . 
H103 H 1.7617 0.6869 0.1229 0.183 Uiso 1 1 calc R . . 
C104 C 1.6616(6) 0.8385(5) 0.10545(16) 0.167(5) Uani 1 1 d G . . 
H104 H 1.7192 0.8463 0.0701 0.201 Uiso 1 1 calc R . . 
C105 C 1.5500(7) 0.9223(4) 0.12668(19) 0.153(4) Uani 1 1 d G . . 
H105 H 1.5330 0.9862 0.1055 0.184 Uiso 1 1 calc R . . 
C106 C 1.4639(5) 0.9107(3) 0.1796(2) 0.098(2) Uani 1 1 d G . . 
H106 H 1.3892 0.9668 0.1938 0.117 Uiso 1 1 calc R . . 
C107 C 1.3967(6) 0.8001(4) 0.2676(2) 0.0623(14) Uani 1 1 d . . . 
C108 C 1.4322(8) 0.7013(4) 0.2947(3) 0.0730(16) Uani 1 1 d . . . 
C109 C 1.3457(10) 0.6789(6) 0.3492(3) 0.104(2) Uani 1 1 d . . . 
H109 H 1.3628 0.6130 0.3674 0.125 Uiso 1 1 calc R . . 
C110 C 1.2427(10) 0.7559(7) 0.3715(3) 0.107(3) Uani 1 1 d . . . 
H110 H 1.1891 0.7439 0.4072 0.128 Uiso 1 1 calc R . . 
C111 C 1.2093(9) 0.8558(6) 0.3440(3) 0.106(2) Uani 1 1 d . . . 
H111 H 1.1330 0.9081 0.3611 0.127 Uiso 1 1 calc R . . 
C112 C 1.2910(8) 0.8767(4) 0.2909(3) 0.0786(17) Uani 1 1 d . . . 
H112 H 1.2716 0.9427 0.2725 0.094 Uiso 1 1 calc R . . 
C113 C 1.5435(10) 0.6202(5) 0.2732(4) 0.116(3) Uani 1 1 d . . . 
H113 H 1.5593 0.5557 0.2934 0.139 Uiso 1 1 calc R . . 
C114 C 1.6402(11) 0.6340(5) 0.2175(4) 0.122(3) Uani 1 1 d . . . 
H114 H 1.7206 0.5809 0.2026 0.146 Uiso 1 1 calc R . . 
 
loop_ 
 _atom_site_aniso_label 
 _atom_site_aniso_U_11 
 _atom_site_aniso_U_22 
 _atom_site_aniso_U_33 
 _atom_site_aniso_U_23 
 _atom_site_aniso_U_13 
 _atom_site_aniso_U_12 
O11 0.090(3) 0.0449(18) 0.068(2) 0.0082(16) 0.048(2) 0.0064(18) 
O12 0.066(2) 0.054(2) 0.0465(18) 0.0095(16) 0.0234(17) 0.0084(17) 
O13 0.055(2) 0.054(2) 0.049(2) 0.0103(16) -0.0105(17) -0.0113(18) 
O14 0.055(2) 0.0515(19) 0.0448(18) 0.0070(15) -0.0103(16) -0.0022(16) 
C11 0.029(2) 0.038(2) 0.026(2) -0.0110(17) 0.0035(17) -0.0085(19) 
C12 0.033(2) 0.035(2) 0.034(2) -0.0052(18) 0.0053(19) -0.0093(19) 
C13 0.027(2) 0.053(3) 0.037(2) -0.006(2) 0.0091(19) -0.005(2) 
C14 0.034(3) 0.055(3) 0.048(3) -0.011(2) 0.020(2) 0.001(2) 
C15 0.042(3) 0.045(3) 0.047(3) -0.007(2) 0.009(2) -0.001(2) 
C16 0.030(2) 0.039(2) 0.037(2) -0.0043(19) 0.0033(19) -0.0020(19) 
C17 0.036(3) 0.040(2) 0.032(2) -0.0082(19) 0.012(2) -0.010(2) 
C18 0.036(3) 0.037(2) 0.046(3) -0.012(2) 0.009(2) -0.001(2) 
O21 0.057(2) 0.0444(18) 0.0478(18) -0.0123(14) -0.0078(15) 0.0006(16) 
O22 0.0479(19) 0.0492(18) 0.0309(15) -0.0025(14) 0.0005(14) -0.0040(15) 
O23 0.041(2) 0.131(3) 0.054(2) -0.044(2) 0.0140(17) -0.031(2) 
O24 0.050(2) 0.075(2) 0.0342(18) -0.0160(15) 0.0005(15) -0.0168(18) 
C21 0.030(2) 0.028(2) 0.030(2) -0.0022(17) 0.0044(18) -0.0043(18) 
C22 0.037(3) 0.033(2) 0.030(2) -0.0011(17) 0.000(2) -0.0071(19) 
C23 0.024(2) 0.050(3) 0.040(2) -0.005(2) 0.0039(19) -0.0088(19) 
C24 0.031(3) 0.051(3) 0.037(2) -0.004(2) 0.010(2) -0.002(2) 
C25 0.038(3) 0.038(2) 0.033(2) -0.0048(18) 0.004(2) -0.006(2) 
C26 0.030(2) 0.031(2) 0.030(2) -0.0015(17) 0.0050(19) -0.0026(18) 
C27 0.026(2) 0.042(3) 0.040(2) -0.004(2) 0.007(2) -0.007(2) 
C28 0.038(3) 0.042(2) 0.035(2) -0.0120(19) 0.003(2) -0.001(2) 
O31 0.093(3) 0.053(2) 0.0496(19) 0.0059(16) 0.0384(19) 0.0147(18) 
O32 0.080(3) 0.055(2) 0.0349(17) 0.0007(15) 0.0100(17) -0.0023(18) 
O33 0.056(2) 0.0521(19) 0.0497(19) 0.0016(16) -0.0114(17) -0.0080(16) 
O34 0.052(2) 0.0509(19) 0.062(2) 0.0060(16) -0.0108(17) -0.0168(16) 
C31 0.029(2) 0.047(3) 0.033(2) -0.0114(19) 0.0027(19) -0.009(2) 
C32 0.032(2) 0.047(2) 0.030(2) -0.0076(19) 0.0059(19) -0.013(2) 
C33 0.041(3) 0.060(3) 0.044(3) -0.011(2) 0.009(2) -0.017(2) 
C34 0.031(3) 0.071(3) 0.051(3) -0.018(2) 0.016(2) -0.004(2) 
C35 0.033(3) 0.053(3) 0.049(3) -0.012(2) 0.002(2) 0.007(2) 
C36 0.037(3) 0.043(2) 0.035(2) -0.0076(19) -0.004(2) -0.003(2) 
C37 0.038(3) 0.045(3) 0.039(2) -0.003(2) 0.007(2) -0.014(2) 
C38 0.047(3) 0.036(3) 0.041(3) -0.005(2) 0.005(2) 0.001(2) 
O41 0.042(2) 0.122(3) 0.059(2) -0.038(2) 0.0099(17) -0.029(2) 
O42 0.042(2) 0.086(2) 0.0395(18) -0.0196(16) 0.0005(16) -0.0142(18) 
O43 0.053(2) 0.0501(19) 0.0429(17) -0.0126(14) -0.0048(15) -0.0021(16) 
O44 0.0495(19) 0.0567(19) 0.0238(15) 0.0032(14) 0.0052(14) -0.0042(15) 
C41 0.035(3) 0.033(2) 0.029(2) -0.0016(17) 0.0040(19) -0.0029(19) 
C42 0.031(2) 0.039(2) 0.027(2) 0.0044(17) 0.0006(19) -0.0056(19) 
C43 0.038(3) 0.051(3) 0.031(2) 0.0011(19) 0.000(2) -0.010(2) 
C44 0.030(3) 0.051(3) 0.036(2) -0.001(2) 0.011(2) -0.005(2) 
C45 0.041(3) 0.041(2) 0.028(2) -0.0028(18) 0.008(2) -0.002(2) 
C46 0.029(2) 0.036(2) 0.029(2) 0.0028(17) 0.0048(18) -0.0048(18) 
C47 0.033(3) 0.041(2) 0.035(2) -0.0030(19) 0.000(2) 0.001(2) 
C48 0.033(3) 0.052(3) 0.031(2) -0.006(2) 0.007(2) -0.009(2) 
N11A 0.050(3) 0.082(3) 0.040(2) -0.018(2) 0.019(2) -0.011(2) 
C11A 0.064(4) 0.080(4) 0.046(3) -0.007(3) 0.020(3) -0.021(3) 
C12A 0.071(4) 0.051(3) 0.056(3) -0.004(2) 0.020(3) -0.012(3) 
C13A 0.040(3) 0.053(3) 0.037(2) -0.013(2) 0.012(2) -0.013(2) 
C14A 0.056(3) 0.050(3) 0.048(3) -0.006(2) 0.019(2) 0.004(2) 
C15A 0.056(3) 0.067(3) 0.059(3) -0.023(3) 0.026(3) 0.003(3) 
C16A 0.050(3) 0.046(2) 0.039(2) -0.007(2) 0.014(2) -0.010(2) 
N21A 0.048(3) 0.095(4) 0.047(2) -0.034(3) 0.019(2) -0.025(3) 
C21A 0.064(4) 0.067(3) 0.059(3) -0.021(3) 0.020(3) -0.008(3) 
C22A 0.054(3) 0.057(3) 0.052(3) -0.017(2) 0.021(2) -0.003(2) 
C23A 0.046(3) 0.057(3) 0.041(3) -0.013(2) 0.008(2) -0.014(2) 
C24A 0.070(4) 0.063(3) 0.057(3) -0.010(3) 0.024(3) -0.019(3) 
C25A 0.075(4) 0.085(4) 0.043(3) -0.010(3) 0.017(3) -0.030(3) 
C26A 0.049(3) 0.048(3) 0.050(3) -0.018(2) 0.014(2) -0.003(2) 
C101 0.086(4) 0.077(4) 0.056(3) -0.013(3) -0.006(3) -0.038(3) 
C102 0.058(4) 0.145(7) 0.098(5) -0.067(5) 0.010(4) -0.036(4) 
C103 0.163(8) 0.257(12) 0.098(6) -0.065(7) 0.009(6) -0.140(8) 
C104 0.133(7) 0.349(15) 0.101(6) -0.138(9) 0.070(6) -0.160(9) 
C105 0.218(10) 0.258(11) 0.065(4) -0.044(6) 0.041(5) -0.194(9) 
C106 0.111(5) 0.100(5) 0.104(5) -0.033(4) 0.007(4) -0.057(4) 
C107 0.049(3) 0.068(4) 0.077(4) -0.023(3) -0.006(3) -0.020(3) 
C108 0.081(4) 0.064(4) 0.076(4) -0.018(3) -0.026(3) -0.015(3) 
C109 0.110(6) 0.125(6) 0.089(5) -0.027(5) -0.001(5) -0.045(5) 
C110 0.138(7) 0.148(7) 0.052(4) 0.023(5) -0.027(4) -0.081(6) 
C111 0.104(6) 0.164(7) 0.069(4) -0.055(5) 0.010(4) -0.054(5) 
C112 0.091(5) 0.073(4) 0.077(4) -0.026(3) -0.005(3) -0.024(3) 
C113 0.110(6) 0.081(5) 0.155(8) -0.023(5) -0.053(6) -0.011(5) 
C114 0.133(7) 0.078(5) 0.152(7) -0.039(5) -0.067(6) -0.005(5) 
 
_geom_special_details 
; 
 All esds (except the esd in the dihedral angle between two l.s. planes) 
 are estimated using the full covariance matrix.  The cell esds are taken 
 into account individually in the estimation of esds in distances, angles 
 and torsion angles; correlations between esds in cell parameters are only 
 used when they are defined by crystal symmetry.  An approximate (isotropic) 
 treatment of cell esds is used for estimating esds involving l.s. planes. 
; 
 
loop_ 
 _geom_bond_atom_site_label_1 
 _geom_bond_atom_site_label_2 
 _geom_bond_distance 
 _geom_bond_site_symmetry_2 
 _geom_bond_publ_flag 
O11 C17 1.183(4) . ? 
O12 C17 1.314(4) . ? 
O13 C18 1.315(6) . ? 
O14 C18 1.216(5) . ? 
C11 C16 1.391(5) . ? 
C11 C12 1.403(5) . ? 
C11 C21 1.509(5) . ? 
C12 C13 1.397(5) . ? 
C12 C17 1.485(5) . ? 
C13 C14 1.362(5) . ? 
C14 C15 1.373(5) . ? 
C15 C16 1.388(5) . ? 
C16 C18 1.507(6) . ? 
O21 C27 1.265(4) . ? 
O22 C27 1.244(4) . ? 
O23 C28 1.204(5) . ? 
O24 C28 1.330(4) . ? 
C21 C26 1.401(5) . ? 
C21 C22 1.394(5) . ? 
C22 C23 1.380(5) . ? 
C22 C27 1.501(5) . ? 
C23 C24 1.392(5) . ? 
C24 C25 1.368(6) . ? 
C25 C26 1.404(5) . ? 
C26 C28 1.473(6) . ? 
O31 C37 1.197(4) . ? 
O32 C37 1.319(5) . ? 
O33 C38 1.234(5) . ? 
O34 C38 1.291(5) . ? 
C31 C36 1.391(5) . ? 
C31 C32 1.418(5) . ? 
C31 C41 1.505(5) . ? 
C32 C33 1.391(5) . ? 
C32 C37 1.476(5) . ? 
C33 C34 1.368(6) . ? 
C34 C35 1.383(6) . ? 
C35 C36 1.383(5) . ? 
C36 C38 1.495(6) . ? 
O41 C47 1.209(5) . ? 
O42 C47 1.327(5) . ? 
O43 C48 1.250(4) . ? 
O44 C48 1.253(4) . ? 
C41 C42 1.394(5) . ? 
C41 C46 1.402(5) . ? 
C42 C43 1.388(5) . ? 
C42 C48 1.509(5) . ? 
C43 C44 1.380(5) . ? 
C44 C45 1.381(6) . ? 
C45 C46 1.401(5) . ? 
C46 C47 1.469(6) . ? 
N11A C11A 1.298(6) . ? 
N11A C15A 1.324(6) . ? 
C11A C12A 1.373(6) . ? 
C12A C13A 1.385(6) . ? 
C13A C14A 1.379(6) . ? 
C13A C16A 1.460(5) . ? 
C14A C15A 1.368(5) . ? 
C16A C26A 1.326(6) . ? 
N21A C25A 1.311(6) . ? 
N21A C21A 1.328(6) . ? 
C21A C22A 1.357(6) . ? 
C22A C23A 1.375(6) . ? 
C23A C24A 1.397(6) . ? 
C23A C26A 1.469(5) . ? 
C24A C25A 1.370(6) . ? 
C101 C102 1.3900 . ? 
C101 C106 1.3900 . ? 
C101 C107 1.490(6) . ? 
C102 C114 1.369(8) . ? 
C102 C103 1.3900 . ? 
C103 C104 1.3900 . ? 
C104 C105 1.3900 . ? 
C105 C106 1.3900 . ? 
C107 C112 1.323(7) . ? 
C107 C108 1.386(7) . ? 
C108 C113 1.366(8) . ? 
C108 C109 1.449(8) . ? 
C109 C110 1.308(9) . ? 
C110 C111 1.402(9) . ? 
C111 C112 1.400(8) . ? 
C113 C114 1.491(10) . ? 
 
loop_ 
 _geom_angle_atom_site_label_1 
 _geom_angle_atom_site_label_2 
 _geom_angle_atom_site_label_3 
 _geom_angle 
 _geom_angle_site_symmetry_1 
 _geom_angle_site_symmetry_3 
 _geom_angle_publ_flag 
C16 C11 C12 117.9(3) . . ? 
C16 C11 C21 120.0(3) . . ? 
C12 C11 C21 122.1(3) . . ? 
C13 C12 C11 119.6(3) . . ? 
C13 C12 C17 119.5(3) . . ? 
C11 C12 C17 120.9(3) . . ? 
C14 C13 C12 121.3(4) . . ? 
C13 C14 C15 119.8(4) . . ? 
C14 C15 C16 120.0(4) . . ? 
C15 C16 C11 121.3(4) . . ? 
C15 C16 C18 116.7(3) . . ? 
C11 C16 C18 122.0(3) . . ? 
O11 C17 O12 120.7(4) . . ? 
O11 C17 C12 125.1(4) . . ? 
O12 C17 C12 114.2(3) . . ? 
O14 C18 O13 120.4(4) . . ? 
O14 C18 C16 122.1(4) . . ? 
O13 C18 C16 117.4(4) . . ? 
C26 C21 C22 119.0(3) . . ? 
C26 C21 C11 122.6(4) . . ? 
C22 C21 C11 118.4(3) . . ? 
C23 C22 C21 121.1(4) . . ? 
C23 C22 C27 120.1(4) . . ? 
C21 C22 C27 118.8(3) . . ? 
C22 C23 C24 119.9(4) . . ? 
C25 C24 C23 119.8(4) . . ? 
C24 C25 C26 121.2(4) . . ? 
C21 C26 C25 119.1(4) . . ? 
C21 C26 C28 120.7(3) . . ? 
C25 C26 C28 120.1(3) . . ? 
O22 C27 O21 122.8(4) . . ? 
O22 C27 C22 119.1(3) . . ? 
O21 C27 C22 118.1(4) . . ? 
O23 C28 O24 121.0(4) . . ? 
O23 C28 C26 125.9(4) . . ? 
O24 C28 C26 113.1(3) . . ? 
C36 C31 C32 118.3(3) . . ? 
C36 C31 C41 120.4(4) . . ? 
C32 C31 C41 121.2(3) . . ? 
C33 C32 C31 119.0(4) . . ? 
C33 C32 C37 120.7(4) . . ? 
C31 C32 C37 120.3(3) . . ? 
C34 C33 C32 121.8(4) . . ? 
C33 C34 C35 119.3(4) . . ? 
C34 C35 C36 120.4(4) . . ? 
C35 C36 C31 121.0(4) . . ? 
C35 C36 C38 117.7(4) . . ? 
C31 C36 C38 121.3(4) . . ? 
O31 C37 O32 122.3(4) . . ? 
O31 C37 C32 125.2(4) . . ? 
O32 C37 C32 112.5(3) . . ? 
O33 C38 O34 120.4(4) . . ? 
O33 C38 C36 120.9(5) . . ? 
O34 C38 C36 118.7(4) . . ? 
C42 C41 C46 119.5(3) . . ? 
C42 C41 C31 117.8(3) . . ? 
C46 C41 C31 122.7(4) . . ? 
C43 C42 C41 121.2(4) . . ? 
C43 C42 C48 119.8(4) . . ? 
C41 C42 C48 119.0(3) . . ? 
C44 C43 C42 119.6(4) . . ? 
C43 C44 C45 119.9(4) . . ? 
C44 C45 C46 121.6(4) . . ? 
C45 C46 C41 118.4(4) . . ? 
C45 C46 C47 120.5(4) . . ? 
C41 C46 C47 121.1(3) . . ? 
O41 C47 O42 121.6(4) . . ? 
O41 C47 C46 124.8(4) . . ? 
O42 C47 C46 113.6(3) . . ? 
O43 C48 O44 123.1(4) . . ? 
O43 C48 C42 118.7(4) . . ? 
O44 C48 C42 118.2(4) . . ? 
C11A N11A C15A 121.2(4) . . ? 
N11A C11A C12A 121.1(5) . . ? 
C11A C12A C13A 119.8(4) . . ? 
C14A C13A C12A 117.2(4) . . ? 
C14A C13A C16A 124.0(4) . . ? 
C12A C13A C16A 118.8(4) . . ? 
C15A C14A C13A 119.9(4) . . ? 
N11A C15A C14A 120.7(4) . . ? 
C26A C16A C13A 124.2(4) . . ? 
C25A N21A C21A 122.2(4) . . ? 
N21A C21A C22A 119.4(5) . . ? 
C21A C22A C23A 121.3(5) . . ? 
C22A C23A C24A 117.1(4) . . ? 
C22A C23A C26A 123.6(4) . . ? 
C24A C23A C26A 119.2(4) . . ? 
C25A C24A C23A 119.2(5) . . ? 
N21A C25A C24A 120.7(5) . . ? 
C16A C26A C23A 125.3(4) . . ? 
C102 C101 C106 120.0 . . ? 
C102 C101 C107 118.7(4) . . ? 
C106 C101 C107 121.3(4) . . ? 
C114 C102 C101 125.8(5) . . ? 
C114 C102 C103 114.2(5) . . ? 
C101 C102 C103 120.0 . . ? 
C104 C103 C102 120.0 . . ? 
C103 C104 C105 120.0 . . ? 
C106 C105 C104 120.0 . . ? 
C105 C106 C101 120.0 . . ? 
C112 C107 C108 122.3(6) . . ? 
C112 C107 C101 122.0(5) . . ? 
C108 C107 C101 115.7(5) . . ? 
C113 C108 C107 124.4(7) . . ? 
C113 C108 C109 115.9(7) . . ? 
C107 C108 C109 119.6(6) . . ? 
C110 C109 C108 116.9(7) . . ? 
C109 C110 C111 123.0(7) . . ? 
C112 C111 C110 119.9(6) . . ? 
C107 C112 C111 118.3(6) . . ? 
C108 C113 C114 120.7(7) . . ? 
C102 C114 C113 114.6(7) . . ? 
 
_diffrn_measured_fraction_theta_max    0.989 
_diffrn_reflns_theta_full              25.50 
_diffrn_measured_fraction_theta_full   0.989 
_refine_diff_density_max    0.541 
_refine_diff_density_min   -0.394 
_refine_diff_density_rms    0.065 

 
data_4 
 
_audit_creation_method            SHELXL-97 
_chemical_name_systematic 
; 
 ? 
; 
_chemical_name_common             ? 
_chemical_melting_point           ? 
_chemical_formula_moiety          ? 
_chemical_formula_sum 
 'C60 H40 N2 O16' 
_chemical_formula_weight          1044.94 
 
loop_ 
 _atom_type_symbol 
 _atom_type_description 
 _atom_type_scat_dispersion_real 
 _atom_type_scat_dispersion_imag 
 _atom_type_scat_source 
 'C'  'C'   0.0033   0.0016 
 'International Tables Vol C Tables 4.2.6.8 and 6.1.1.4' 
 'H'  'H'   0.0000   0.0000 
 'International Tables Vol C Tables 4.2.6.8 and 6.1.1.4' 
 'N'  'N'   0.0061   0.0033 
 'International Tables Vol C Tables 4.2.6.8 and 6.1.1.4' 
 'O'  'O'   0.0106   0.0060 
 'International Tables Vol C Tables 4.2.6.8 and 6.1.1.4' 
 
_symmetry_cell_setting            Triclinic 
_symmetry_space_group_name_H-M    P-1 
 
loop_ 
 _symmetry_equiv_pos_as_xyz 
 'x, y, z' 
 '-x, -y, -z' 
 
_cell_length_a                    8.0203(11) 
_cell_length_b                    12.7391(18) 
_cell_length_c                    14.0636(19) 
_cell_angle_alpha                 114.499(4) 
_cell_angle_beta                  100.823(4) 
_cell_angle_gamma                 98.386(4) 
_cell_volume                      1243.4(3) 
_cell_formula_units_Z             1 
_cell_measurement_temperature     293(2) 
_cell_measurement_reflns_used     4203
_cell_measurement_theta_min       1.66 
_cell_measurement_theta_max       24.71  
 
_exptl_crystal_description       prismatic
_exptl_crystal_colour            'bright red' 
_exptl_crystal_size_max           0.18
_exptl_crystal_size_mid           0.14
_exptl_crystal_size_min           0.12
_exptl_crystal_density_meas       'not measured' 
_exptl_crystal_density_diffrn     1.396 
_exptl_crystal_density_method     'not measured' 
_exptl_crystal_F_000              542 
_exptl_absorpt_coefficient_mu     0.102 
_exptl_absorpt_correction_type    empirical
_exptl_absorpt_correction_T_min   0.983
_exptl_absorpt_correction_T_max   0.988 
_exptl_absorpt_process_details    sadabs 
 
_exptl_special_details 
; 
 ? 
; 
 
_diffrn_ambient_temperature       293(2) 
_diffrn_radiation_wavelength      0.71073 
_diffrn_radiation_type            MoK\a 
_diffrn_radiation_source          'fine-focus sealed tube' 
_diffrn_radiation_monochromator   graphite 
_diffrn_measurement_device_type   'Bruker CCD APEX 2'
_diffrn_measurement_method        'hemisphere' 
_diffrn_detector_area_resol_mean  ? 
_diffrn_standards_number          ? 
_diffrn_standards_interval_count  ? 
_diffrn_standards_interval_time   ? 
_diffrn_standards_decay_%         ? 
_diffrn_reflns_number             14317 
_diffrn_reflns_av_R_equivalents   0.0524 
_diffrn_reflns_av_sigmaI/netI     0.0587 
_diffrn_reflns_limit_h_min        -9 
_diffrn_reflns_limit_h_max        9 
_diffrn_reflns_limit_k_min        -14 
_diffrn_reflns_limit_k_max        14 
_diffrn_reflns_limit_l_min        -16 
_diffrn_reflns_limit_l_max        16 
_diffrn_reflns_theta_min          1.66 
_diffrn_reflns_theta_max          24.71 
_reflns_number_total              4203 
_reflns_number_gt                 2472 
_reflns_threshold_expression      >2sigma(I) 
 
_computing_data_collection        ? 
_computing_cell_refinement        ? 
_computing_data_reduction         ? 
_computing_structure_solution     'SHELXS-97 (Sheldrick, 1990)' 
_computing_structure_refinement   'SHELXL-97 (Sheldrick, 1997)' 
_computing_molecular_graphics     ? 
_computing_publication_material   ? 
 
_refine_special_details 
; 
 Refinement of F^2^ against ALL reflections.  The weighted R-factor wR and 
 goodness of fit S are based on F^2^, conventional R-factors R are based 
 on F, with F set to zero for negative F^2^. The threshold expression of 
 F^2^ > 2sigma(F^2^) is used only for calculating R-factors(gt) etc. and is 
 not relevant to the choice of reflections for refinement.  R-factors based 
 on F^2^ are statistically about twice as large as those based on F, and R- 
 factors based on ALL data will be even larger. 
; 
 
_refine_ls_structure_factor_coef  Fsqd  
_refine_ls_matrix_type            full 
_refine_ls_weighting_scheme       calc  
_refine_ls_weighting_details 
 'calc w=1/[\s^2^(Fo^2^)+(0.1000P)^2^+0.0000P] where P=(Fo^2^+2Fc^2^)/3' 
_atom_sites_solution_primary      direct 
_atom_sites_solution_secondary    difmap 
_atom_sites_solution_hydrogens    geom 
_refine_ls_hydrogen_treatment     mixed 
_refine_ls_extinction_method      none 
_refine_ls_extinction_coef        ? 
_refine_ls_number_reflns          4203 
_refine_ls_number_parameters      364 
_refine_ls_number_restraints      0 
_refine_ls_R_factor_all           0.1114 
_refine_ls_R_factor_gt            0.0568 
_refine_ls_wR_factor_ref          0.1698 
_refine_ls_wR_factor_gt           0.1458 
_refine_ls_goodness_of_fit_ref    0.954 
_refine_ls_restrained_S_all       0.954 
_refine_ls_shift/su_max           0.068 
_refine_ls_shift/su_mean          0.002 
 
loop_ 
 _atom_site_label 
 _atom_site_type_symbol 
 _atom_site_fract_x 
 _atom_site_fract_y 
 _atom_site_fract_z 
 _atom_site_U_iso_or_equiv 
 _atom_site_adp_type 
 _atom_site_occupancy 
 _atom_site_symmetry_multiplicity 
 _atom_site_calc_flag 
 _atom_site_refinement_flags 
 _atom_site_disorder_assembly 
 _atom_site_disorder_group 
O11 O -0.0309(3) 0.1649(2) 0.3176(2) 0.0781(8) Uani 1 1 d . . . 
O12 O 0.1968(3) 0.2565(2) 0.2919(2) 0.0702(7) Uani 1 1 d . . . 
H12O H 0.235(4) 0.326(3) 0.289(2) 0.050 Uiso 1 1 d . . . 
O13 O -0.2386(4) 0.3309(2) -0.0370(2) 0.0937(10) Uani 1 1 d . . . 
O14 O -0.2287(4) 0.5176(2) 0.0605(2) 0.0746(8) Uani 1 1 d . . . 
H14O H -0.239(3) 0.512(2) -0.014(3) 0.050 Uiso 1 1 d . . . 
C11 C -0.0904(4) 0.3250(2) 0.1687(2) 0.0383(7) Uani 1 1 d . . . 
C12 C -0.0711(4) 0.3175(3) 0.2669(2) 0.0458(8) Uani 1 1 d . . . 
C13 C -0.1512(5) 0.3830(3) 0.3432(3) 0.0645(10) Uani 1 1 d . . . 
H13 H -0.1393 0.3765 0.4075 0.077 Uiso 1 1 calc R . . 
C14 C -0.2476(5) 0.4569(3) 0.3254(3) 0.0710(11) Uani 1 1 d . . . 
H14 H -0.3020 0.4992 0.3767 0.085 Uiso 1 1 calc R . . 
C15 C -0.2629(4) 0.4680(3) 0.2314(3) 0.0554(9) Uani 1 1 d . . . 
H15 H -0.3250 0.5200 0.2202 0.066 Uiso 1 1 calc R . . 
C16 C -0.1867(4) 0.4026(2) 0.1527(2) 0.0394(7) Uani 1 1 d . . . 
C17 C 0.0312(5) 0.2385(3) 0.2928(2) 0.0551(9) Uani 1 1 d . . . 
C18 C -0.2178(4) 0.4132(3) 0.0496(2) 0.0436(7) Uani 1 1 d . . . 
O21 O -0.3454(3) 0.1202(2) 0.0740(2) 0.0822(9) Uani 1 1 d . . . 
O22 O -0.3602(3) -0.0187(2) -0.08793(19) 0.0693(8) Uani 1 1 d . . . 
H22O H -0.448(4) -0.053(3) -0.079(2) 0.050 Uiso 1 1 d . . . 
O23 O 0.2965(3) 0.49803(17) 0.13467(16) 0.0518(6) Uani 1 1 d . . . 
O24 O 0.2954(3) 0.43900(18) 0.26186(16) 0.0546(6) Uani 1 1 d . . . 
C21 C -0.0129(4) 0.2503(2) 0.0824(2) 0.0371(7) Uani 1 1 d . . . 
C22 C -0.1045(4) 0.1349(2) 0.0010(2) 0.0384(7) Uani 1 1 d . . . 
C23 C -0.0293(4) 0.0709(3) -0.0791(2) 0.0448(7) Uani 1 1 d . . . 
H23 H -0.0909 -0.0052 -0.1326 0.054 Uiso 1 1 calc R . . 
C24 C 0.1357(4) 0.1190(3) -0.0800(2) 0.0493(8) Uani 1 1 d . . . 
H24 H 0.1861 0.0749 -0.1329 0.059 Uiso 1 1 calc R . . 
C25 C 0.2253(4) 0.2324(3) -0.0022(3) 0.0472(8) Uani 1 1 d . . . 
H25 H 0.3349 0.2657 -0.0044 0.057 Uiso 1 1 calc R . . 
C26 C 0.1545(4) 0.2976(2) 0.0794(2) 0.0380(7) Uani 1 1 d . . . 
C27 C -0.2814(4) 0.0799(3) -0.0012(2) 0.0439(7) Uani 1 1 d . . . 
C28 C 0.2568(4) 0.4197(3) 0.1645(2) 0.0422(7) Uani 1 1 d . . . 
N1 N 0.1780(4) 0.6928(3) 0.2611(2) 0.0595(8) Uani 1 1 d . . . 
H1N H 0.221(4) 0.635(3) 0.210(2) 0.050 Uiso 1 1 d . . . 
C1 C 0.1676(4) 0.6831(3) 0.3503(3) 0.0626(9) Uani 1 1 d . . . 
H1 H 0.1988 0.6200 0.3600 0.075 Uiso 1 1 calc R . . 
C2 C 0.1115(4) 0.7651(3) 0.4275(3) 0.0559(9) Uani 1 1 d . . . 
H2 H 0.1033 0.7573 0.4895 0.067 Uiso 1 1 calc R . . 
C3 C 0.0667(4) 0.8602(3) 0.4145(2) 0.0435(7) Uani 1 1 d . . . 
C4 C 0.0786(4) 0.8656(3) 0.3188(3) 0.0542(8) Uani 1 1 d . . . 
H4 H 0.0486 0.9276 0.3065 0.065 Uiso 1 1 calc R . . 
C5 C 0.1334(4) 0.7812(3) 0.2436(3) 0.0610(9) Uani 1 1 d . . . 
H5 H 0.1399 0.7850 0.1797 0.073 Uiso 1 1 calc R . . 
C6 C 0.0150(4) 0.9506(2) 0.5000(2) 0.0442(7) Uani 1 1 d . . . 
H6 H 0.0023 0.9375 0.5588 0.053 Uiso 1 1 calc R . . 
C101 C 0.5255(5) -0.0851(4) 0.6338(3) 0.0722(11) Uani 1 1 d . . . 
H101 H 0.5268 -0.1005 0.6930 0.087 Uiso 1 1 calc R . . 
C102 C 0.4760(4) 0.0189(3) 0.6362(3) 0.0559(9) Uani 1 1 d . . . 
C103 C 0.4322(5) 0.1014(4) 0.7243(3) 0.0735(11) Uani 1 1 d . . . 
H103 H 0.4312 0.0880 0.7843 0.088 Uiso 1 1 calc R . . 
C104 C 0.3906(5) 0.2016(4) 0.7235(3) 0.0771(12) Uani 1 1 d . . . 
H104 H 0.3637 0.2559 0.7835 0.092 Uiso 1 1 calc R . . 
C105 C 0.3883(4) 0.2226(3) 0.6347(3) 0.0703(11) Uani 1 1 d . . . 
H105 H 0.3587 0.2907 0.6352 0.084 Uiso 1 1 calc R . . 
C106 C 0.4297(4) 0.1435(3) 0.5446(3) 0.0542(8) Uani 1 1 d . . . 
C107 C 0.4762(3) 0.0406(3) 0.5445(2) 0.0438(7) Uani 1 1 d . . . 
C108 C 0.4300(5) 0.1610(4) 0.4506(3) 0.0708(10) Uani 1 1 d . . . 
H108 H 0.3982 0.2274 0.4482 0.085 Uiso 1 1 calc R . . 
 
loop_ 
 _atom_site_aniso_label 
 _atom_site_aniso_U_11 
 _atom_site_aniso_U_22 
 _atom_site_aniso_U_33 
 _atom_site_aniso_U_23 
 _atom_site_aniso_U_13 
 _atom_site_aniso_U_12 
O11 0.108(2) 0.0812(18) 0.0891(19) 0.0662(17) 0.0474(16) 0.0383(16) 
O12 0.0809(19) 0.0804(18) 0.0853(18) 0.0632(16) 0.0292(14) 0.0370(15) 
O13 0.177(3) 0.0785(19) 0.0432(15) 0.0278(15) 0.0306(17) 0.081(2) 
O14 0.137(2) 0.0481(14) 0.0507(15) 0.0287(12) 0.0284(15) 0.0362(15) 
C11 0.0446(16) 0.0354(16) 0.0393(17) 0.0180(14) 0.0174(14) 0.0121(13) 
C12 0.064(2) 0.0429(17) 0.0404(18) 0.0225(15) 0.0221(15) 0.0205(15) 
C13 0.099(3) 0.072(2) 0.045(2) 0.0350(19) 0.037(2) 0.037(2) 
C14 0.106(3) 0.079(3) 0.057(2) 0.035(2) 0.050(2) 0.059(2) 
C15 0.071(2) 0.057(2) 0.052(2) 0.0264(17) 0.0280(18) 0.0361(18) 
C16 0.0457(17) 0.0351(16) 0.0369(17) 0.0145(14) 0.0133(14) 0.0122(14) 
C17 0.082(3) 0.056(2) 0.0435(19) 0.0292(17) 0.0278(18) 0.0282(19) 
C18 0.0478(18) 0.0480(19) 0.0383(19) 0.0177(16) 0.0154(15) 0.0231(15) 
O21 0.0818(18) 0.0583(16) 0.0786(18) 0.0006(14) 0.0501(15) -0.0042(14) 
O22 0.0681(17) 0.0666(17) 0.0486(15) 0.0098(14) 0.0217(13) -0.0100(14) 
O23 0.0704(14) 0.0391(12) 0.0521(13) 0.0256(11) 0.0195(11) 0.0132(11) 
O24 0.0675(14) 0.0534(14) 0.0437(13) 0.0258(11) 0.0091(11) 0.0142(11) 
C21 0.0513(18) 0.0359(16) 0.0362(16) 0.0222(14) 0.0176(14) 0.0203(14) 
C22 0.0494(17) 0.0356(16) 0.0408(17) 0.0230(15) 0.0181(14) 0.0159(14) 
C23 0.064(2) 0.0342(16) 0.0410(18) 0.0182(15) 0.0189(16) 0.0179(15) 
C24 0.064(2) 0.0483(19) 0.050(2) 0.0243(17) 0.0321(17) 0.0278(17) 
C25 0.0518(18) 0.0469(19) 0.055(2) 0.0277(17) 0.0254(16) 0.0178(16) 
C26 0.0480(17) 0.0370(16) 0.0396(17) 0.0229(14) 0.0165(14) 0.0188(14) 
C27 0.058(2) 0.0350(17) 0.0383(19) 0.0153(16) 0.0165(16) 0.0112(15) 
C28 0.0443(17) 0.0433(18) 0.046(2) 0.0230(16) 0.0159(15) 0.0169(14) 
N1 0.0554(17) 0.0486(17) 0.0569(19) 0.0040(15) 0.0237(15) 0.0136(14) 
C1 0.068(2) 0.049(2) 0.076(3) 0.027(2) 0.030(2) 0.0210(18) 
C2 0.068(2) 0.0446(19) 0.062(2) 0.0256(18) 0.0270(18) 0.0182(17) 
C3 0.0411(17) 0.0431(18) 0.0408(18) 0.0132(15) 0.0149(14) 0.0086(14) 
C4 0.062(2) 0.060(2) 0.0443(19) 0.0209(17) 0.0207(16) 0.0258(17) 
C5 0.067(2) 0.069(2) 0.043(2) 0.0169(19) 0.0226(17) 0.024(2) 
C6 0.0523(18) 0.0477(18) 0.0345(16) 0.0181(15) 0.0162(14) 0.0147(15) 
C101 0.080(3) 0.089(3) 0.062(3) 0.053(2) 0.013(2) 0.016(2) 
C102 0.0464(19) 0.074(2) 0.046(2) 0.0283(19) 0.0140(16) 0.0084(17) 
C103 0.061(2) 0.101(3) 0.050(2) 0.027(2) 0.0208(19) 0.012(2) 
C104 0.059(2) 0.088(3) 0.061(3) 0.010(2) 0.025(2) 0.017(2) 
C105 0.054(2) 0.062(2) 0.079(3) 0.015(2) 0.021(2) 0.0205(19) 
C106 0.0403(18) 0.056(2) 0.062(2) 0.0246(18) 0.0107(16) 0.0110(16) 
C107 0.0331(16) 0.0515(19) 0.0424(19) 0.0198(16) 0.0070(14) 0.0072(14) 
C108 0.079(3) 0.068(3) 0.071(3) 0.037(2) 0.012(2) 0.027(2) 
 
_geom_special_details 
; 
 All esds (except the esd in the dihedral angle between two l.s. planes) 
 are estimated using the full covariance matrix.  The cell esds are taken 
 into account individually in the estimation of esds in distances, angles 
 and torsion angles; correlations between esds in cell parameters are only 
 used when they are defined by crystal symmetry.  An approximate (isotropic) 
 treatment of cell esds is used for estimating esds involving l.s. planes. 
; 
 
loop_ 
 _geom_bond_atom_site_label_1 
 _geom_bond_atom_site_label_2 
 _geom_bond_distance 
 _geom_bond_site_symmetry_2 
 _geom_bond_publ_flag 
O11 C17 1.205(4) . ? 
O12 C17 1.318(4) . ? 
O13 C18 1.193(3) . ? 
O14 C18 1.293(4) . ? 
C11 C16 1.402(4) . ? 
C11 C12 1.405(4) . ? 
C11 C21 1.506(4) . ? 
C12 C13 1.389(4) . ? 
C12 C17 1.500(4) . ? 
C13 C14 1.372(5) . ? 
C14 C15 1.372(4) . ? 
C15 C16 1.389(4) . ? 
C16 C18 1.490(4) . ? 
O21 C27 1.214(3) . ? 
O22 C27 1.294(4) . ? 
O23 C28 1.256(3) . ? 
O24 C28 1.253(3) . ? 
C21 C26 1.405(4) . ? 
C21 C22 1.408(4) . ? 
C22 C23 1.391(4) . ? 
C22 C27 1.477(4) . ? 
C23 C24 1.380(4) . ? 
C24 C25 1.375(4) . ? 
C25 C26 1.386(4) . ? 
C26 C28 1.497(4) . ? 
N1 C1 1.326(4) . ? 
N1 C5 1.330(4) . ? 
C1 C2 1.362(4) . ? 
C2 C3 1.384(4) . ? 
C3 C4 1.396(4) . ? 
C3 C6 1.457(4) . ? 
C4 C5 1.355(4) . ? 
C6 C6 1.314(5) 2_576 ? 
C101 C108 1.333(5) 2_656 ? 
C101 C102 1.428(5) . ? 
C102 C103 1.398(5) . ? 
C102 C107 1.426(4) . ? 
C103 C104 1.368(6) . ? 
C104 C105 1.380(6) . ? 
C105 C106 1.389(5) . ? 
C106 C107 1.414(4) . ? 
C106 C108 1.429(5) . ? 
C107 C107 1.416(6) 2_656 ? 
C108 C101 1.333(5) 2_656 ? 
 
loop_ 
 _geom_angle_atom_site_label_1 
 _geom_angle_atom_site_label_2 
 _geom_angle_atom_site_label_3 
 _geom_angle 
 _geom_angle_site_symmetry_1 
 _geom_angle_site_symmetry_3 
 _geom_angle_publ_flag 
C16 C11 C12 118.0(2) . . ? 
C16 C11 C21 120.9(2) . . ? 
C12 C11 C21 121.0(2) . . ? 
C13 C12 C11 120.0(3) . . ? 
C13 C12 C17 117.7(3) . . ? 
C11 C12 C17 122.3(3) . . ? 
C14 C13 C12 121.2(3) . . ? 
C15 C14 C13 119.4(3) . . ? 
C14 C15 C16 120.8(3) . . ? 
C15 C16 C11 120.5(3) . . ? 
C15 C16 C18 118.0(3) . . ? 
C11 C16 C18 121.4(2) . . ? 
O11 C17 O12 120.6(3) . . ? 
O11 C17 C12 122.4(3) . . ? 
O12 C17 C12 116.9(3) . . ? 
O13 C18 O14 122.3(3) . . ? 
O13 C18 C16 123.0(3) . . ? 
O14 C18 C16 114.6(3) . . ? 
C26 C21 C22 118.0(2) . . ? 
C26 C21 C11 119.5(2) . . ? 
C22 C21 C11 122.4(2) . . ? 
C23 C22 C21 120.3(3) . . ? 
C23 C22 C27 118.8(3) . . ? 
C21 C22 C27 120.9(3) . . ? 
C24 C23 C22 120.7(3) . . ? 
C25 C24 C23 119.7(3) . . ? 
C24 C25 C26 120.8(3) . . ? 
C25 C26 C21 120.5(3) . . ? 
C25 C26 C28 119.7(2) . . ? 
C21 C26 C28 119.8(2) . . ? 
O21 C27 O22 122.2(3) . . ? 
O21 C27 C22 123.2(3) . . ? 
O22 C27 C22 114.5(3) . . ? 
O24 C28 O23 123.5(3) . . ? 
O24 C28 C26 118.3(2) . . ? 
O23 C28 C26 118.1(2) . . ? 
C1 N1 C5 121.8(3) . . ? 
N1 C1 C2 120.3(3) . . ? 
C1 C2 C3 120.4(3) . . ? 
C2 C3 C4 117.0(3) . . ? 
C2 C3 C6 120.0(3) . . ? 
C4 C3 C6 123.0(3) . . ? 
C5 C4 C3 120.5(3) . . ? 
N1 C5 C4 120.0(3) . . ? 
C6 C6 C3 124.8(3) 2_576 . ? 
C108 C101 C102 122.2(3) 2_656 . ? 
C103 C102 C107 118.8(3) . . ? 
C103 C102 C101 123.6(3) . . ? 
C107 C102 C101 117.7(3) . . ? 
C104 C103 C102 121.1(4) . . ? 
C103 C104 C105 120.6(4) . . ? 
C104 C105 C106 120.9(4) . . ? 
C105 C106 C107 119.4(3) . . ? 
C105 C106 C108 123.2(3) . . ? 
C107 C106 C108 117.4(3) . . ? 
C106 C107 C107 121.1(3) . 2_656 ? 
C106 C107 C102 119.3(3) . . ? 
C107 C107 C102 119.7(4) 2_656 . ? 
C101 C108 C106 122.0(3) 2_656 . ? 
 
_diffrn_measured_fraction_theta_max    0.992 
_diffrn_reflns_theta_full              24.71 
_diffrn_measured_fraction_theta_full   0.992 
_refine_diff_density_max    0.293 
_refine_diff_density_min   -0.269 
_refine_diff_density_rms    0.055 
 
data_5 
 
_audit_creation_method            SHELXL-97 
_chemical_name_systematic 
; 
 ? 
; 
_chemical_name_common             ? 
_chemical_melting_point           ? 
_chemical_formula_moiety          ? 
_chemical_formula_sum 
 'C56 H38 N2 O16' 
_chemical_formula_weight          994.88 
 
loop_ 
 _atom_type_symbol 
 _atom_type_description 
 _atom_type_scat_dispersion_real 
 _atom_type_scat_dispersion_imag 
 _atom_type_scat_source 
 'C'  'C'   0.0033   0.0016 
 'International Tables Vol C Tables 4.2.6.8 and 6.1.1.4' 
 'H'  'H'   0.0000   0.0000 
 'International Tables Vol C Tables 4.2.6.8 and 6.1.1.4' 
 'N'  'N'   0.0061   0.0033 
 'International Tables Vol C Tables 4.2.6.8 and 6.1.1.4' 
 'O'  'O'   0.0106   0.0060 
 'International Tables Vol C Tables 4.2.6.8 and 6.1.1.4' 
 
_symmetry_cell_setting             Monoclinic     
_symmetry_space_group_name_H-M     P21/n 
 
loop_ 
 _symmetry_equiv_pos_as_xyz 
 'x, y, z' 
 '-x+1/2, y+1/2, -z+1/2' 
 '-x, -y, -z' 
 'x-1/2, -y-1/2, z-1/2' 
 
_cell_length_a                    13.5901(12) 
_cell_length_b                    7.9936(7) 
_cell_length_c                    21.3350(19) 
_cell_angle_alpha                 90.00 
_cell_angle_beta                  90.121(3) 
_cell_angle_gamma                 90.00 
_cell_volume                      2317.7(4) 
_cell_formula_units_Z             2 
_cell_measurement_temperature     293(2) 
_cell_measurement_reflns_used     4539 
_cell_measurement_theta_min       1.77  
_cell_measurement_theta_max       26.00  
 
_exptl_crystal_description        needle 
_exptl_crystal_colour             'yellowish green'  
_exptl_crystal_size_max           0.22
_exptl_crystal_size_mid           0.16 
_exptl_crystal_size_min           0.11 
_exptl_crystal_density_meas       'not measured' 
_exptl_crystal_density_diffrn     1.426 
_exptl_crystal_density_method     'not measured' 
_exptl_crystal_F_000              1032 
_exptl_absorpt_coefficient_mu     0.106 
_exptl_absorpt_correction_type    empirical 
_exptl_absorpt_correction_T_min   0.980
_exptl_absorpt_correction_T_max   0.988 
_exptl_absorpt_process_details    sadabs 
 
_exptl_special_details 
; 
 ? 
; 
 
_diffrn_ambient_temperature       293(2) 
_diffrn_radiation_wavelength      0.71073 
_diffrn_radiation_type            MoK\a 
_diffrn_radiation_source          'fine-focus sealed tube' 
_diffrn_radiation_monochromator   graphite 
_diffrn_measurement_device_type   'Bruker CCD APEX 2'
_diffrn_measurement_method         'hemisphere'
_diffrn_detector_area_resol_mean  ? 
_diffrn_standards_number          ? 
_diffrn_standards_interval_count  ? 
_diffrn_standards_interval_time   ? 
_diffrn_standards_decay_%         ? 
_diffrn_reflns_number             28150 
_diffrn_reflns_av_R_equivalents   0.0381 
_diffrn_reflns_av_sigmaI/netI     0.0263 
_diffrn_reflns_limit_h_min        -16 
_diffrn_reflns_limit_h_max        16 
_diffrn_reflns_limit_k_min        -8 
_diffrn_reflns_limit_k_max        9 
_diffrn_reflns_limit_l_min        -26 
_diffrn_reflns_limit_l_max        25 
_diffrn_reflns_theta_min          1.77 
_diffrn_reflns_theta_max          26.00 
_reflns_number_total              4539 
_reflns_number_gt                 3332 
_reflns_threshold_expression      >2sigma(I) 
 
_computing_data_collection        ? 
_computing_cell_refinement        ? 
_computing_data_reduction         ? 
_computing_structure_solution     'SHELXS-97 (Sheldrick, 1990)' 
_computing_structure_refinement   'SHELXL-97 (Sheldrick, 1997)' 
_computing_molecular_graphics     ? 
_computing_publication_material   ? 
 
_refine_special_details 
; 
 Refinement of F^2^ against ALL reflections.  The weighted R-factor wR and 
 goodness of fit S are based on F^2^, conventional R-factors R are based 
 on F, with F set to zero for negative F^2^. The threshold expression of 
 F^2^ > 2sigma(F^2^) is used only for calculating R-factors(gt) etc. and is 
 not relevant to the choice of reflections for refinement.  R-factors based 
 on F^2^ are statistically about twice as large as those based on F, and R- 
 factors based on ALL data will be even larger. 
; 
 
_refine_ls_structure_factor_coef  Fsqd  
_refine_ls_matrix_type            full 
_refine_ls_weighting_scheme       calc  
_refine_ls_weighting_details 
 'calc w=1/[\s^2^(Fo^2^)+(0.1000P)^2^+0.0000P] where P=(Fo^2^+2Fc^2^)/3' 
_atom_sites_solution_primary      direct 
_atom_sites_solution_secondary    difmap 
_atom_sites_solution_hydrogens    geom 
_refine_ls_hydrogen_treatment     mixed
_refine_ls_extinction_method      none 
_refine_ls_extinction_coef        ? 
_refine_ls_number_reflns          4539 
_refine_ls_number_parameters      355 
_refine_ls_number_restraints      0 
_refine_ls_R_factor_all           0.0792 
_refine_ls_R_factor_gt            0.0546 
_refine_ls_wR_factor_ref          0.1809 
_refine_ls_wR_factor_gt           0.1676 
_refine_ls_goodness_of_fit_ref    1.263 
_refine_ls_restrained_S_all       1.263 
_refine_ls_shift/su_max           0.062 
_refine_ls_shift/su_mean          0.003 
 
loop_ 
 _atom_site_label 
 _atom_site_type_symbol 
 _atom_site_fract_x 
 _atom_site_fract_y 
 _atom_site_fract_z 
 _atom_site_U_iso_or_equiv 
 _atom_site_adp_type 
 _atom_site_occupancy 
 _atom_site_symmetry_multiplicity 
 _atom_site_calc_flag 
 _atom_site_refinement_flags 
 _atom_site_disorder_assembly 
 _atom_site_disorder_group 
O11 O 0.18416(12) 0.0920(3) 0.25690(9) 0.0743(6) Uani 1 1 d . . . 
H11O H 0.2451(19) 0.107(3) 0.2546(11) 0.050 Uiso 1 1 d . . . 
O12 O 0.19330(12) 0.1597(3) 0.15786(9) 0.0874(7) Uani 1 1 d . . . 
O13 O -0.23291(12) 0.3675(3) 0.09748(10) 0.0778(6) Uani 1 1 d . . . 
O14 O -0.16215(12) 0.5591(2) 0.15516(10) 0.0638(5) Uani 1 1 d . . . 
H14O H -0.1146(17) 0.570(3) 0.1827(11) 0.050 Uiso 1 1 d . . . 
C11 C -0.01376(13) 0.2720(2) 0.17110(9) 0.0321(4) Uani 1 1 d . . . 
C12 C 0.03605(14) 0.1464(2) 0.20452(9) 0.0360(5) Uani 1 1 d . . . 
C13 C -0.01634(16) 0.0235(3) 0.23594(11) 0.0505(6) Uani 1 1 d . . . 
H13 H 0.0171 -0.0577 0.2588 0.061 Uiso 1 1 calc R . . 
C14 C -0.11743(18) 0.0209(3) 0.23355(13) 0.0621(7) Uani 1 1 d . . . 
H14 H -0.1521 -0.0644 0.2533 0.075 Uiso 1 1 calc R . . 
C15 C -0.16731(16) 0.1454(3) 0.20179(12) 0.0535(6) Uani 1 1 d . . . 
H15 H -0.2357 0.1439 0.2005 0.064 Uiso 1 1 calc R . . 
C16 C -0.11696(13) 0.2711(3) 0.17204(9) 0.0388(5) Uani 1 1 d . . . 
C17 C 0.14521(14) 0.1370(3) 0.20392(10) 0.0420(5) Uani 1 1 d . . . 
C18 C -0.17502(14) 0.4029(3) 0.13828(11) 0.0481(6) Uani 1 1 d . . . 
O21 O -0.03525(10) 0.59824(19) 0.24397(7) 0.0490(4) Uani 1 1 d . . . 
O22 O 0.12432(11) 0.6218(2) 0.26151(8) 0.0586(5) Uani 1 1 d . . . 
O23 O 0.08388(15) 0.1748(3) -0.01214(9) 0.0806(7) Uani 1 1 d . . . 
H23O H 0.0494(17) 0.082(3) -0.0298(11) 0.050 Uiso 1 1 d . . . 
O24 O -0.02499(15) 0.1113(2) 0.05990(8) 0.0743(6) Uani 1 1 d . . . 
C21 C 0.04108(12) 0.3978(2) 0.13272(9) 0.0306(4) Uani 1 1 d . . . 
C22 C 0.07398(13) 0.5479(2) 0.15918(9) 0.0352(5) Uani 1 1 d . . . 
C23 C 0.12570(15) 0.6628(3) 0.12346(11) 0.0481(6) Uani 1 1 d . . . 
H23 H 0.1478 0.7614 0.1419 0.058 Uiso 1 1 calc R . . 
C24 C 0.14488(16) 0.6329(3) 0.06097(11) 0.0499(6) Uani 1 1 d . . . 
H24 H 0.1775 0.7126 0.0370 0.060 Uiso 1 1 calc R . . 
C25 C 0.11541(14) 0.4844(3) 0.03447(10) 0.0430(5) Uani 1 1 d . . . 
H25 H 0.1298 0.4628 -0.0074 0.052 Uiso 1 1 calc R . . 
C26 C 0.06441(13) 0.3661(3) 0.06943(9) 0.0347(5) Uani 1 1 d . . . 
C27 C 0.05221(14) 0.5903(3) 0.22674(10) 0.0400(5) Uani 1 1 d . . . 
C28 C 0.03719(14) 0.2059(3) 0.03912(9) 0.0418(5) Uani 1 1 d . . . 
N11A N 0.41211(14) 0.2802(3) 0.12888(10) 0.0531(5) Uani 1 1 d . . . 
H11N H 0.3873(16) 0.211(3) 0.1632(11) 0.050 Uiso 1 1 d . . . 
C11A C 0.34953(18) 0.3550(4) 0.09041(15) 0.0742(9) Uani 1 1 d . . . 
H11A H 0.2825 0.3499 0.0988 0.089 Uiso 1 1 calc R . . 
C12A C 0.38124(16) 0.4392(4) 0.03894(13) 0.0645(8) Uani 1 1 d . . . 
H12A H 0.3360 0.4871 0.0115 0.077 Uiso 1 1 calc R . . 
C13A C 0.48141(13) 0.4535(2) 0.02745(9) 0.0357(5) Uani 1 1 d . . . 
C14A C 0.54426(15) 0.3760(3) 0.06924(10) 0.0458(5) Uani 1 1 d . . . 
H14A H 0.6119 0.3830 0.0634 0.055 Uiso 1 1 calc R . . 
C15A C 0.50741(17) 0.2889(3) 0.11913(10) 0.0496(6) Uani 1 1 d . . . 
H15A H 0.5504 0.2351 0.1465 0.060 Uiso 1 1 calc R . . 
C101 C 0.6290(5) 0.9577(5) 0.0314(2) 0.1187(16) Uani 1 1 d . . . 
C102 C 0.5252(4) 0.9614(4) 0.02628(16) 0.0979(13) Uani 1 1 d . . . 
C103 C 0.4718(4) 0.8877(4) 0.07500(17) 0.0994(13) Uani 1 1 d . . . 
C104 C 0.5197(5) 0.8140(5) 0.12605(19) 0.1180(16) Uani 1 1 d . . . 
H104 H 0.4830 0.7665 0.1582 0.142 Uiso 1 1 calc R . . 
C105 C 0.6199(5) 0.8115(6) 0.1289(3) 0.1343(18) Uani 1 1 d . . . 
H105 H 0.6514 0.7611 0.1628 0.161 Uiso 1 1 calc R . . 
C106 C 0.6735(4) 0.8822(6) 0.0826(2) 0.1293(16) Uani 1 1 d . . . 
H106 H 0.7418 0.8801 0.0852 0.155 Uiso 1 1 calc R . . 
C107 C 0.6604(4) 1.0283(8) -0.0179(4) 0.0828(19) Uani 0.50 1 d P . . 
H107 H 0.7288 1.0292 -0.0201 0.099 Uiso 0.50 1 calc PR . . 
C108 C 0.3817(5) 0.8978(7) 0.0678(3) 0.0681(15) Uani 0.50 1 d P . . 
H108 H 0.3411 0.8521 0.0983 0.082 Uiso 0.50 1 calc PR . . 
 
loop_ 
 _atom_site_aniso_label 
 _atom_site_aniso_U_11 
 _atom_site_aniso_U_22 
 _atom_site_aniso_U_33 
 _atom_site_aniso_U_23 
 _atom_site_aniso_U_13 
 _atom_site_aniso_U_12 
O11 0.0414(8) 0.1254(19) 0.0559(11) 0.0324(11) -0.0005(8) 0.0064(10) 
O12 0.0464(9) 0.149(2) 0.0670(13) 0.0518(13) 0.0154(9) 0.0189(11) 
O13 0.0486(9) 0.1045(16) 0.0801(14) 0.0029(12) -0.0297(9) -0.0049(9) 
O14 0.0465(9) 0.0628(12) 0.0819(13) 0.0022(10) -0.0172(9) 0.0123(8) 
C11 0.0332(9) 0.0350(11) 0.0281(9) -0.0073(8) 0.0015(7) -0.0039(8) 
C12 0.0414(10) 0.0345(11) 0.0321(10) -0.0025(9) 0.0041(8) 0.0001(8) 
C13 0.0535(12) 0.0457(14) 0.0523(14) 0.0093(11) 0.0092(10) -0.0018(10) 
C14 0.0573(14) 0.0547(16) 0.0743(18) 0.0115(14) 0.0160(12) -0.0168(12) 
C15 0.0403(11) 0.0599(16) 0.0603(15) -0.0031(13) 0.0085(10) -0.0134(10) 
C16 0.0328(9) 0.0461(13) 0.0374(11) -0.0069(9) 0.0017(8) -0.0060(8) 
C17 0.0421(11) 0.0424(12) 0.0416(12) 0.0117(10) 0.0071(9) 0.0076(9) 
C18 0.0272(9) 0.0650(17) 0.0521(14) 0.0025(12) -0.0004(9) -0.0033(9) 
O21 0.0413(8) 0.0539(10) 0.0518(10) -0.0149(7) 0.0074(7) -0.0027(7) 
O22 0.0432(8) 0.0810(12) 0.0515(10) -0.0290(9) -0.0025(7) -0.0056(8) 
O23 0.0917(13) 0.0853(15) 0.0650(12) -0.0379(11) 0.0391(10) -0.0367(11) 
O24 0.0947(13) 0.0760(13) 0.0522(11) -0.0301(9) 0.0278(10) -0.0417(10) 
C21 0.0253(8) 0.0349(11) 0.0318(10) -0.0009(8) -0.0018(7) 0.0021(7) 
C22 0.0309(9) 0.0346(11) 0.0400(11) -0.0025(9) -0.0008(8) -0.0013(7) 
C23 0.0472(11) 0.0385(13) 0.0585(15) 0.0018(11) 0.0040(10) -0.0063(9) 
C24 0.0506(12) 0.0480(15) 0.0511(14) 0.0137(11) 0.0069(10) -0.0070(10) 
C25 0.0395(10) 0.0562(15) 0.0332(11) 0.0071(10) 0.0025(8) 0.0009(9) 
C26 0.0307(9) 0.0450(12) 0.0285(10) 0.0010(9) -0.0012(7) 0.0025(8) 
C27 0.0398(10) 0.0359(12) 0.0445(12) -0.0090(9) 0.0013(9) -0.0015(8) 
C28 0.0376(10) 0.0566(14) 0.0312(11) -0.0058(10) 0.0023(8) -0.0037(9) 
N11A 0.0608(12) 0.0510(12) 0.0475(12) 0.0111(10) 0.0163(9) -0.0030(9) 
C11A 0.0425(12) 0.095(2) 0.085(2) 0.0391(18) 0.0169(13) -0.0011(13) 
C12A 0.0351(11) 0.0840(19) 0.0743(17) 0.0387(15) 0.0086(11) 0.0008(11) 
C13A 0.0333(9) 0.0361(11) 0.0377(11) 0.0001(9) 0.0032(8) -0.0015(8) 
C14A 0.0377(10) 0.0581(15) 0.0417(12) 0.0073(11) -0.0015(9) 0.0003(9) 
C15A 0.0593(13) 0.0536(15) 0.0360(12) 0.0052(10) -0.0020(10) 0.0028(11) 
C101 0.208(6) 0.066(3) 0.082(3) -0.006(2) -0.002(3) 0.015(3) 
C102 0.193(4) 0.0415(19) 0.059(2) -0.0117(15) -0.008(2) 0.013(2) 
C103 0.184(4) 0.051(2) 0.063(2) -0.0084(16) -0.006(2) 0.006(2) 
C104 0.219(5) 0.064(2) 0.071(3) 0.0071(19) 0.008(3) 0.001(3) 
C105 0.193(6) 0.107(4) 0.102(4) -0.001(3) -0.040(4) 0.019(4) 
C106 0.173(5) 0.103(4) 0.112(4) -0.001(3) -0.018(4) 0.022(3) 
C107 0.063(3) 0.061(4) 0.124(6) -0.010(4) 0.003(4) 0.001(3) 
C108 0.075(4) 0.050(3) 0.079(4) -0.004(3) 0.023(3) -0.008(3) 
 
_geom_special_details 
; 
 All esds (except the esd in the dihedral angle between two l.s. planes) 
 are estimated using the full covariance matrix.  The cell esds are taken 
 into account individually in the estimation of esds in distances, angles 
 and torsion angles; correlations between esds in cell parameters are only 
 used when they are defined by crystal symmetry.  An approximate (isotropic) 
 treatment of cell esds is used for estimating esds involving l.s. planes. 
; 
 
loop_ 
 _geom_bond_atom_site_label_1 
 _geom_bond_atom_site_label_2 
 _geom_bond_distance 
 _geom_bond_site_symmetry_2 
 _geom_bond_publ_flag 
O11 C17 1.298(3) . ? 
O12 C17 1.195(2) . ? 
O13 C18 1.206(3) . ? 
O14 C18 1.312(3) . ? 
C11 C16 1.403(2) . ? 
C11 C12 1.405(3) . ? 
C11 C21 1.497(3) . ? 
C12 C13 1.387(3) . ? 
C12 C17 1.485(3) . ? 
C13 C14 1.375(3) . ? 
C14 C15 1.381(4) . ? 
C15 C16 1.372(3) . ? 
C16 C18 1.499(3) . ? 
O21 C27 1.246(2) . ? 
O22 C27 1.253(2) . ? 
O23 C28 1.290(3) . ? 
O24 C28 1.219(3) . ? 
C21 C22 1.399(3) . ? 
C21 C26 1.411(3) . ? 
C22 C23 1.386(3) . ? 
C22 C27 1.510(3) . ? 
C23 C24 1.380(3) . ? 
C24 C25 1.374(3) . ? 
C25 C26 1.391(3) . ? 
C26 C28 1.481(3) . ? 
N11A C15A 1.314(3) . ? 
N11A C11A 1.324(3) . ? 
C11A C12A 1.359(4) . ? 
C12A C13A 1.388(3) . ? 
C13A C14A 1.380(3) . ? 
C13A C13A 1.477(4) 3_665 ? 
C14A C15A 1.368(3) . ? 
C101 C107 1.269(9) . ? 
C101 C106 1.386(6) . ? 
C101 C102 1.416(6) . ? 
C102 C103 1.399(6) . ? 
C102 C102 1.450(7) 3_675 ? 
C103 C108 1.237(7) . ? 
C103 C104 1.398(6) . ? 
C104 C105 1.363(7) . ? 
C105 C106 1.353(7) . ? 
C107 C108 1.343(10) 3_675 ? 
C108 C107 1.343(10) 3_675 ? 
 
loop_ 
 _geom_angle_atom_site_label_1 
 _geom_angle_atom_site_label_2 
 _geom_angle_atom_site_label_3 
 _geom_angle 
 _geom_angle_site_symmetry_1 
 _geom_angle_site_symmetry_3 
 _geom_angle_publ_flag 
C16 C11 C12 118.04(17) . . ? 
C16 C11 C21 120.67(17) . . ? 
C12 C11 C21 121.21(15) . . ? 
C13 C12 C11 120.29(18) . . ? 
C13 C12 C17 118.83(18) . . ? 
C11 C12 C17 120.79(17) . . ? 
C14 C13 C12 120.4(2) . . ? 
C13 C14 C15 119.8(2) . . ? 
C16 C15 C14 120.7(2) . . ? 
C15 C16 C11 120.6(2) . . ? 
C15 C16 C18 118.31(18) . . ? 
C11 C16 C18 120.99(18) . . ? 
O12 C17 O11 122.4(2) . . ? 
O12 C17 C12 123.2(2) . . ? 
O11 C17 C12 114.32(18) . . ? 
O13 C18 O14 120.5(2) . . ? 
O13 C18 C16 121.6(2) . . ? 
O14 C18 C16 117.86(18) . . ? 
C22 C21 C26 117.92(17) . . ? 
C22 C21 C11 120.98(17) . . ? 
C26 C21 C11 121.05(17) . . ? 
C23 C22 C21 120.57(19) . . ? 
C23 C22 C27 118.48(18) . . ? 
C21 C22 C27 120.94(17) . . ? 
C24 C23 C22 120.9(2) . . ? 
C25 C24 C23 119.4(2) . . ? 
C24 C25 C26 120.8(2) . . ? 
C25 C26 C21 120.28(19) . . ? 
C25 C26 C28 118.57(18) . . ? 
C21 C26 C28 121.14(18) . . ? 
O21 C27 O22 124.1(2) . . ? 
O21 C27 C22 118.79(17) . . ? 
O22 C27 C22 117.08(17) . . ? 
O24 C28 O23 122.1(2) . . ? 
O24 C28 C26 123.42(18) . . ? 
O23 C28 C26 114.47(19) . . ? 
C15A N11A C11A 120.7(2) . . ? 
N11A C11A C12A 121.4(2) . . ? 
C11A C12A C13A 119.7(2) . . ? 
C14A C13A C12A 117.05(19) . . ? 
C14A C13A C13A 121.7(2) . 3_665 ? 
C12A C13A C13A 121.2(2) . 3_665 ? 
C15A C14A C13A 120.27(19) . . ? 
N11A C15A C14A 120.8(2) . . ? 
C107 C101 C106 134.5(7) . . ? 
C107 C101 C102 105.3(5) . . ? 
C106 C101 C102 120.2(5) . . ? 
C103 C102 C101 116.9(4) . . ? 
C103 C102 C102 120.6(6) . 3_675 ? 
C101 C102 C102 122.5(6) . 3_675 ? 
C108 C103 C104 125.7(6) . . ? 
C108 C103 C102 113.2(5) . . ? 
C104 C103 C102 121.0(5) . . ? 
C105 C104 C103 120.3(5) . . ? 
C106 C105 C104 120.0(5) . . ? 
C105 C106 C101 121.5(6) . . ? 
C101 C107 C108 135.1(6) . 3_675 ? 
C103 C108 C107 123.2(6) . 3_675 ? 
 
_diffrn_measured_fraction_theta_max    0.999 
_diffrn_reflns_theta_full              26.00 
_diffrn_measured_fraction_theta_full   0.999 
_refine_diff_density_max    0.577 
_refine_diff_density_min   -0.383 
_refine_diff_density_rms    0.045 
 
data_6 
 
_audit_creation_method            SHELXL-97 
_chemical_name_systematic 
; 
 ? 
; 
_chemical_name_common             ? 
_chemical_melting_point           ? 
_chemical_formula_moiety          ? 
_chemical_formula_sum 
 'C58 H38 N2 O16' 
_chemical_formula_weight          1018.90 
 
loop_ 
 _atom_type_symbol 
 _atom_type_description 
 _atom_type_scat_dispersion_real 
 _atom_type_scat_dispersion_imag 
 _atom_type_scat_source 
 'C'  'C'   0.0033   0.0016 
 'International Tables Vol C Tables 4.2.6.8 and 6.1.1.4' 
 'H'  'H'   0.0000   0.0000 
 'International Tables Vol C Tables 4.2.6.8 and 6.1.1.4' 
 'N'  'N'   0.0061   0.0033 
 'International Tables Vol C Tables 4.2.6.8 and 6.1.1.4' 
 'O'  'O'   0.0106   0.0060 
 'International Tables Vol C Tables 4.2.6.8 and 6.1.1.4' 
 
_symmetry_cell_setting            Monoclinic 
_symmetry_space_group_name_H-M    P21/n 
 
loop_ 
 _symmetry_equiv_pos_as_xyz 
 'x, y, z' 
 '-x+1/2, y+1/2, -z+1/2' 
 '-x, -y, -z' 
 'x-1/2, -y-1/2, z-1/2' 
 
_cell_length_a                    13.799(3) 
_cell_length_b                    8.2058(16) 
_cell_length_c                    20.873(4) 
_cell_angle_alpha                 90.00 
_cell_angle_beta                  90.402(6) 
_cell_angle_gamma                 90.00 
_cell_volume                      2363.4(8) 
_cell_formula_units_Z             2 
_cell_measurement_temperature     293(2) 
_cell_measurement_reflns_used     4042  
_cell_measurement_theta_min       1.76 
_cell_measurement_theta_max       25.00  
 
_exptl_crystal_description       block 
_exptl_crystal_colour            'dark red' 
_exptl_crystal_size_max           0.18 
_exptl_crystal_size_mid           0.13 
_exptl_crystal_size_min           0.11
_exptl_crystal_density_meas       'not measured' 
_exptl_crystal_density_diffrn     1.432 
_exptl_crystal_density_method     'not measured' 
_exptl_crystal_F_000              1056 
_exptl_absorpt_coefficient_mu     0.106 
_exptl_absorpt_correction_type    empirical 
_exptl_absorpt_correction_T_min   0.984 
_exptl_absorpt_correction_T_max   0.988 
_exptl_absorpt_process_details    sadabs 
 
_exptl_special_details 
; 
 ? 
; 
 
_diffrn_ambient_temperature       293(2) 
_diffrn_radiation_wavelength      0.71073 
_diffrn_radiation_type            MoK\a 
_diffrn_radiation_source          'fine-focus sealed tube' 
_diffrn_radiation_monochromator   graphite 
_diffrn_measurement_device_type   'Bruker CCD APEX 2' 
_diffrn_measurement_method        'hemisphere'
_diffrn_detector_area_resol_mean  ? 
_diffrn_standards_number          ? 
_diffrn_standards_interval_count  ? 
_diffrn_standards_interval_time   ? 
_diffrn_standards_decay_%         ? 
_diffrn_reflns_number             26070 
_diffrn_reflns_av_R_equivalents   0.1685 
_diffrn_reflns_av_sigmaI/netI     0.1001 
_diffrn_reflns_limit_h_min        -16 
_diffrn_reflns_limit_h_max        16 
_diffrn_reflns_limit_k_min        -9 
_diffrn_reflns_limit_k_max        9 
_diffrn_reflns_limit_l_min        -24 
_diffrn_reflns_limit_l_max        24 
_diffrn_reflns_theta_min          1.76 
_diffrn_reflns_theta_max          25.00 
_reflns_number_total              4042 
_reflns_number_gt                 1791 
_reflns_threshold_expression      >2sigma(I) 
 
_computing_data_collection        ? 
_computing_cell_refinement        ? 
_computing_data_reduction         ? 
_computing_structure_solution     'SHELXS-97 (Sheldrick, 1990)' 
_computing_structure_refinement   'SHELXL-97 (Sheldrick, 1997)' 
_computing_molecular_graphics     ? 
_computing_publication_material   ? 
 
_refine_special_details 
; 
 Refinement of F^2^ against ALL reflections.  The weighted R-factor wR and 
 goodness of fit S are based on F^2^, conventional R-factors R are based 
 on F, with F set to zero for negative F^2^. The threshold expression of 
 F^2^ > 2sigma(F^2^) is used only for calculating R-factors(gt) etc. and is 
 not relevant to the choice of reflections for refinement.  R-factors based 
 on F^2^ are statistically about twice as large as those based on F, and R- 
 factors based on ALL data will be even larger. 
; 
 
_refine_ls_structure_factor_coef  Fsqd  
_refine_ls_matrix_type            full 
_refine_ls_weighting_scheme       calc  
_refine_ls_weighting_details 
 'calc w=1/[\s^2^(Fo^2^)+(0.0914P)^2^+6.1987P] where P=(Fo^2^+2Fc^2^)/3' 
_atom_sites_solution_primary      direct 
_atom_sites_solution_secondary    difmap 
_atom_sites_solution_hydrogens    geom 
_refine_ls_hydrogen_treatment     mixed
_refine_ls_extinction_method      none 
_refine_ls_extinction_coef        ? 
_refine_ls_number_reflns          4042 
_refine_ls_number_parameters      343 
_refine_ls_number_restraints      0 
_refine_ls_R_factor_all           0.1898 
_refine_ls_R_factor_gt            0.0758 
_refine_ls_wR_factor_ref          0.2153 
_refine_ls_wR_factor_gt           0.1672 
_refine_ls_goodness_of_fit_ref    0.803 
_refine_ls_restrained_S_all       0.803 
_refine_ls_shift/su_max           0.091 
_refine_ls_shift/su_mean          0.007 
 
loop_ 
 _atom_site_label 
 _atom_site_type_symbol 
 _atom_site_fract_x 
 _atom_site_fract_y 
 _atom_site_fract_z 
 _atom_site_U_iso_or_equiv 
 _atom_site_adp_type 
 _atom_site_occupancy 
 _atom_site_symmetry_multiplicity 
 _atom_site_calc_flag 
 _atom_site_refinement_flags 
 _atom_site_disorder_assembly 
 _atom_site_disorder_group 
O11 O 1.1923(3) 0.1722(7) 0.1597(2) 0.112(2) Uani 1 1 d . . . 
O12 O 1.1847(3) 0.0892(6) 0.2581(2) 0.0909(16) Uani 1 1 d . . . 
H12O H 1.251(4) 0.103(6) 0.256(2) 0.050 Uiso 1 1 d . . . 
O13 O 0.8413(3) 0.5517(5) 0.1559(2) 0.0668(11) Uani 1 1 d . . . 
H13O H 0.891(3) 0.559(6) 0.189(2) 0.050 Uiso 1 1 d . . . 
O14 O 0.7664(3) 0.3598(5) 0.1006(2) 0.0770(12) Uani 1 1 d . . . 
O21 O 0.9679(2) 0.5956(4) 0.24505(16) 0.0551(10) Uani 1 1 d . . . 
O22 O 1.1259(2) 0.6159(5) 0.26247(16) 0.0641(11) Uani 1 1 d . . . 
O23 O 0.9809(3) 0.1035(5) 0.06298(19) 0.0913(16) Uani 1 1 d . . . 
O24 O 1.0687(3) 0.1793(5) -0.01801(19) 0.0850(15) Uani 1 1 d . . . 
H24O H 1.045(3) 0.092(6) -0.036(2) 0.050 Uiso 1 1 d . . . 
C11 C 0.9881(3) 0.2719(5) 0.1729(2) 0.0332(10) Uani 1 1 d . . . 
C12 C 0.8871(3) 0.2725(6) 0.1745(2) 0.0410(12) Uani 1 1 d . . . 
C13 C 0.8375(4) 0.1505(7) 0.2075(3) 0.0637(16) Uani 1 1 d . . . 
H13 H 0.7701 0.1506 0.2076 0.076 Uiso 1 1 calc R . . 
C14 C 0.8867(4) 0.0314(8) 0.2395(3) 0.0740(18) Uani 1 1 d . . . 
H14 H 0.8531 -0.0504 0.2607 0.089 Uiso 1 1 calc R . . 
C15 C 0.9868(4) 0.0330(7) 0.2402(3) 0.0583(15) Uani 1 1 d . . . 
H15 H 1.0203 -0.0458 0.2635 0.070 Uiso 1 1 calc R . . 
C16 C 1.0381(3) 0.1507(6) 0.2067(2) 0.0396(11) Uani 1 1 d . . . 
C17 C 0.8268(4) 0.3977(7) 0.1407(3) 0.0519(14) Uani 1 1 d . . . 
C18 C 1.1453(4) 0.1424(6) 0.2055(3) 0.0513(14) Uani 1 1 d . . . 
C21 C 1.0407(3) 0.3938(5) 0.1318(2) 0.0333(10) Uani 1 1 d . . . 
C22 C 1.0629(3) 0.3593(6) 0.0679(2) 0.0368(11) Uani 1 1 d . . . 
C23 C 1.1139(3) 0.4710(6) 0.0312(2) 0.0434(12) Uani 1 1 d . . . 
H23 H 1.1273 0.4476 -0.0115 0.052 Uiso 1 1 calc R . . 
C24 C 1.1447(4) 0.6153(6) 0.0573(2) 0.0515(13) Uani 1 1 d . . . 
H24 H 1.1779 0.6904 0.0323 0.062 Uiso 1 1 calc R . . 
C25 C 1.1260(4) 0.6487(6) 0.1209(3) 0.0523(14) Uani 1 1 d . . . 
H25 H 1.1483 0.7455 0.1390 0.063 Uiso 1 1 calc R . . 
C26 C 1.0743(3) 0.5388(6) 0.1582(2) 0.0375(11) Uani 1 1 d . . . 
C27 C 1.0352(4) 0.2011(6) 0.0383(2) 0.0454(12) Uani 1 1 d . . . 
C28 C 1.0554(4) 0.5854(6) 0.2269(2) 0.0421(12) Uani 1 1 d . . . 
N1A N 0.4146(4) 0.2725(5) 0.1288(2) 0.0525(12) Uani 1 1 d . . . 
H11N H 0.386(3) 0.220(6) 0.156(2) 0.050 Uiso 1 1 d . . . 
C1A C 0.5086(4) 0.2801(6) 0.1184(2) 0.0512(13) Uani 1 1 d . . . 
H1A H 0.5511 0.2243 0.1452 0.061 Uiso 1 1 calc R . . 
C2A C 0.5439(4) 0.3693(6) 0.0686(2) 0.0473(13) Uani 1 1 d . . . 
H2A H 0.6105 0.3750 0.0623 0.057 Uiso 1 1 calc R . . 
C3A C 0.4815(3) 0.4517(5) 0.0273(2) 0.0355(11) Uani 1 1 d . . . 
C4A C 0.3837(4) 0.4374(7) 0.0394(3) 0.0619(16) Uani 1 1 d . . . 
H4A H 0.3392 0.4896 0.0128 0.074 Uiso 1 1 calc R . . 
C5A C 0.3516(4) 0.3480(7) 0.0898(3) 0.0687(17) Uani 1 1 d . . . 
H5A H 0.2855 0.3392 0.0973 0.082 Uiso 1 1 calc R . . 
C101 C 0.6914(4) 0.8979(9) 0.0622(5) 0.233(10) Uani 1 1 d G . . 
H101 H 0.7584 0.9026 0.0580 0.279 Uiso 1 1 calc R . . 
C102 C 0.6320(4) 0.9714(7) 0.0165(3) 0.124(4) Uani 1 1 d G . . 
C103 C 0.5318(4) 0.9644(5) 0.0227(2) 0.0639(16) Uani 1 1 d G . . 
C104 C 0.4911(4) 0.8839(6) 0.0745(3) 0.112(3) Uani 1 1 d G . . 
C105 C 0.5504(8) 0.8103(7) 0.1202(2) 0.260(11) Uani 1 1 d G . . 
H105 H 0.5232 0.7564 0.1548 0.311 Uiso 1 1 calc R . . 
C106 C 0.6506(7) 0.8174(8) 0.1140(4) 0.315(16) Uani 1 1 d G . . 
H106 H 0.6903 0.7682 0.1445 0.378 Uiso 1 1 calc R . . 
C107 C 0.3765(10) 0.8844(11) 0.0797(5) 0.128(5) Uani 1 1 d . . . 
H107 H 0.3435 0.8389 0.1140 0.153 Uiso 1 1 calc R . . 
C108 C 0.3312(10) 0.9571(15) 0.0297(7) 0.182(7) Uani 1 1 d . . . 
H108 H 0.2639 0.9530 0.0299 0.219 Uiso 1 1 calc R . . 
 
loop_ 
 _atom_site_aniso_label 
 _atom_site_aniso_U_11 
 _atom_site_aniso_U_22 
 _atom_site_aniso_U_33 
 _atom_site_aniso_U_23 
 _atom_site_aniso_U_13 
 _atom_site_aniso_U_12 
O11 0.050(3) 0.195(6) 0.091(3) 0.085(4) 0.021(2) 0.022(3) 
O12 0.044(2) 0.153(5) 0.076(3) 0.058(3) 0.001(2) 0.002(3) 
O13 0.054(2) 0.064(3) 0.082(3) -0.005(2) -0.017(2) 0.005(2) 
O14 0.052(2) 0.099(3) 0.079(3) -0.003(3) -0.019(2) -0.005(2) 
O21 0.047(2) 0.067(2) 0.051(2) -0.0183(18) 0.0048(17) -0.0046(18) 
O22 0.046(2) 0.095(3) 0.051(2) -0.031(2) 0.0004(17) -0.008(2) 
O23 0.128(4) 0.078(3) 0.068(3) -0.035(2) 0.044(3) -0.056(3) 
O24 0.122(4) 0.074(3) 0.060(3) -0.037(2) 0.040(3) -0.040(3) 
C11 0.038(3) 0.034(3) 0.028(2) -0.008(2) -0.0019(19) -0.006(2) 
C12 0.040(3) 0.050(3) 0.033(3) -0.004(2) 0.004(2) -0.013(2) 
C13 0.037(3) 0.082(4) 0.073(4) 0.009(3) 0.012(3) -0.007(3) 
C14 0.063(4) 0.079(4) 0.081(4) 0.029(4) 0.009(3) -0.025(3) 
C15 0.059(4) 0.053(3) 0.063(4) 0.015(3) 0.012(3) -0.002(3) 
C16 0.041(3) 0.041(3) 0.037(3) 0.006(2) 0.005(2) -0.003(2) 
C17 0.033(3) 0.070(4) 0.053(3) 0.010(3) -0.001(2) -0.008(3) 
C18 0.042(3) 0.056(3) 0.055(3) 0.020(3) 0.000(3) 0.008(3) 
C21 0.029(2) 0.035(3) 0.035(3) 0.003(2) -0.0038(19) 0.002(2) 
C22 0.033(2) 0.045(3) 0.032(3) 0.006(2) -0.001(2) 0.007(2) 
C23 0.042(3) 0.051(3) 0.037(3) 0.001(2) 0.001(2) -0.003(2) 
C24 0.053(3) 0.052(3) 0.049(3) 0.010(3) 0.007(3) -0.009(3) 
C25 0.051(3) 0.041(3) 0.065(4) -0.012(3) 0.005(3) -0.016(2) 
C26 0.038(3) 0.042(3) 0.032(2) -0.005(2) 0.000(2) -0.004(2) 
C27 0.055(3) 0.044(3) 0.038(3) -0.010(2) 0.007(2) -0.002(3) 
C28 0.047(3) 0.036(3) 0.044(3) -0.007(2) 0.001(2) -0.003(2) 
N1A 0.076(4) 0.041(3) 0.040(3) 0.006(2) 0.011(2) -0.009(2) 
C1A 0.054(3) 0.058(4) 0.042(3) 0.009(3) -0.002(2) 0.002(3) 
C2A 0.048(3) 0.050(3) 0.043(3) 0.000(3) -0.001(2) -0.008(3) 
C3A 0.036(3) 0.030(3) 0.040(3) -0.002(2) 0.000(2) -0.001(2) 
C4A 0.038(3) 0.071(4) 0.077(4) 0.030(3) 0.007(3) 0.005(3) 
C5A 0.055(4) 0.077(4) 0.074(4) 0.029(4) 0.020(3) 0.000(3) 
C101 0.229(13) 0.129(10) 0.34(2) -0.106(14) -0.197(15) 0.110(10) 
C102 0.066(5) 0.084(6) 0.221(12) -0.072(7) 0.015(6) 0.002(5) 
C103 0.081(5) 0.037(3) 0.073(4) -0.015(3) 0.007(3) -0.005(3) 
C104 0.226(11) 0.038(4) 0.072(5) -0.005(4) -0.024(6) 0.007(5) 
C105 0.63(3) 0.066(7) 0.079(7) -0.021(5) -0.061(12) -0.017(12) 
C106 0.37(3) 0.177(17) 0.39(3) -0.105(19) -0.28(2) 0.112(17) 
C107 0.214(12) 0.073(6) 0.097(7) -0.020(5) 0.099(8) -0.060(7) 
C108 0.199(14) 0.140(11) 0.210(14) -0.092(10) 0.135(13) -0.100(10) 
 
_geom_special_details 
; 
 All esds (except the esd in the dihedral angle between two l.s. planes) 
 are estimated using the full covariance matrix.  The cell esds are taken 
 into account individually in the estimation of esds in distances, angles 
 and torsion angles; correlations between esds in cell parameters are only 
 used when they are defined by crystal symmetry.  An approximate (isotropic) 
 treatment of cell esds is used for estimating esds involving l.s. planes. 
; 
 
loop_ 
 _geom_bond_atom_site_label_1 
 _geom_bond_atom_site_label_2 
 _geom_bond_distance 
 _geom_bond_site_symmetry_2 
 _geom_bond_publ_flag 
O11 C18 1.184(6) . ? 
O12 C18 1.298(6) . ? 
O13 C17 1.317(6) . ? 
O14 C17 1.216(6) . ? 
O21 C28 1.270(5) . ? 
O22 C28 1.245(5) . ? 
O23 C27 1.215(6) . ? 
O24 C27 1.278(6) . ? 
C11 C12 1.395(6) . ? 
C11 C16 1.399(6) . ? 
C11 C21 1.507(6) . ? 
C12 C13 1.396(7) . ? 
C12 C17 1.496(7) . ? 
C13 C14 1.363(8) . ? 
C14 C15 1.381(7) . ? 
C15 C16 1.390(6) . ? 
C16 C18 1.481(6) . ? 
C21 C26 1.390(6) . ? 
C21 C22 1.398(6) . ? 
C22 C23 1.390(6) . ? 
C22 C27 1.487(6) . ? 
C23 C24 1.369(7) . ? 
C24 C25 1.382(7) . ? 
C25 C26 1.392(6) . ? 
C26 C28 1.509(6) . ? 
N1A C1A 1.318(6) . ? 
N1A C5A 1.337(7) . ? 
C1A C2A 1.364(7) . ? 
C2A C3A 1.390(6) . ? 
C3A C4A 1.380(6) . ? 
C3A C3A 1.481(8) 3_665 ? 
C4A C5A 1.359(7) . ? 
C101 C102 1.3900 . ? 
C101 C106 1.3900 . ? 
C102 C108 1.240(12) 3_675 ? 
C102 C103 1.3900 . ? 
C103 C104 1.3900 . ? 
C103 C103 1.414(8) 3_675 ? 
C104 C105 1.3900 . ? 
C104 C107 1.585(13) . ? 
C105 C106 1.3900 . ? 
C107 C108 1.353(17) . ? 
C108 C102 1.24(2) 3_675 ? 
 
loop_ 
 _geom_angle_atom_site_label_1 
 _geom_angle_atom_site_label_2 
 _geom_angle_atom_site_label_3 
 _geom_angle 
 _geom_angle_site_symmetry_1 
 _geom_angle_site_symmetry_3 
 _geom_angle_publ_flag 
C12 C11 C16 118.7(4) . . ? 
C12 C11 C21 119.8(4) . . ? 
C16 C11 C21 121.4(4) . . ? 
C13 C12 C11 120.2(5) . . ? 
C13 C12 C17 116.9(4) . . ? 
C11 C12 C17 122.9(4) . . ? 
C14 C13 C12 120.7(5) . . ? 
C13 C14 C15 119.6(5) . . ? 
C14 C15 C16 120.9(5) . . ? 
C15 C16 C11 119.8(4) . . ? 
C15 C16 C18 119.3(5) . . ? 
C11 C16 C18 120.9(4) . . ? 
O14 C17 O13 120.9(5) . . ? 
O14 C17 C12 121.6(5) . . ? 
O13 C17 C12 117.5(5) . . ? 
O11 C18 O12 121.6(5) . . ? 
O11 C18 C16 123.8(5) . . ? 
O12 C18 C16 114.4(4) . . ? 
C26 C21 C22 118.5(4) . . ? 
C26 C21 C11 120.2(4) . . ? 
C22 C21 C11 121.2(4) . . ? 
C23 C22 C21 120.5(4) . . ? 
C23 C22 C27 118.4(4) . . ? 
C21 C22 C27 121.1(4) . . ? 
C24 C23 C22 120.5(4) . . ? 
C23 C24 C25 119.7(5) . . ? 
C24 C25 C26 120.6(4) . . ? 
C21 C26 C25 120.2(4) . . ? 
C21 C26 C28 122.4(4) . . ? 
C25 C26 C28 117.4(4) . . ? 
O23 C27 O24 121.8(5) . . ? 
O23 C27 C22 123.8(4) . . ? 
O24 C27 C22 114.3(5) . . ? 
O22 C28 O21 123.4(4) . . ? 
O22 C28 C26 118.5(4) . . ? 
O21 C28 C26 118.1(4) . . ? 
C1A N1A C5A 120.9(5) . . ? 
N1A C1A C2A 120.6(5) . . ? 
C1A C2A C3A 120.7(5) . . ? 
C4A C3A C2A 116.5(4) . . ? 
C4A C3A C3A 121.9(5) . 3_665 ? 
C2A C3A C3A 121.5(5) . 3_665 ? 
C5A C4A C3A 120.8(5) . . ? 
N1A C5A C4A 120.4(5) . . ? 
C102 C101 C106 120.0 . . ? 
C108 C102 C103 120.3(9) 3_675 . ? 
C108 C102 C101 119.7(9) 3_675 . ? 
C103 C102 C101 120.0 . . ? 
C102 C103 C104 120.0 . . ? 
C102 C103 C103 122.3(8) . 3_675 ? 
C104 C103 C103 117.7(8) . 3_675 ? 
C105 C104 C103 120.0 . . ? 
C105 C104 C107 122.5(5) . . ? 
C103 C104 C107 117.5(5) . . ? 
C104 C105 C106 120.0 . . ? 
C105 C106 C101 120.0 . . ? 
C108 C107 C104 113.8(8) . . ? 
C102 C108 C107 128.3(13) 3_675 . ? 
 
_diffrn_measured_fraction_theta_max    0.970 
_diffrn_reflns_theta_full              25.00 
_diffrn_measured_fraction_theta_full   0.970 
_refine_diff_density_max    0.445 
_refine_diff_density_min   -0.357 
_refine_diff_density_rms    0.055 
 
data_7 
 
_audit_creation_method            SHELXL-97 
_chemical_name_systematic 
; 
 ? 
; 
_chemical_name_common             ? 
_chemical_melting_point           ? 
_chemical_formula_moiety          ? 
_chemical_formula_sum 
 'C48 H36 N2 O18' 
_chemical_formula_weight          928.79 
 
loop_ 
 _atom_type_symbol 
 _atom_type_description 
 _atom_type_scat_dispersion_real 
 _atom_type_scat_dispersion_imag 
 _atom_type_scat_source 
 'C'  'C'   0.0033   0.0016 
 'International Tables Vol C Tables 4.2.6.8 and 6.1.1.4' 
 'H'  'H'   0.0000   0.0000 
 'International Tables Vol C Tables 4.2.6.8 and 6.1.1.4' 
 'N'  'N'   0.0061   0.0033 
 'International Tables Vol C Tables 4.2.6.8 and 6.1.1.4' 
 'O'  'O'   0.0106   0.0060 
 'International Tables Vol C Tables 4.2.6.8 and 6.1.1.4' 
 
_symmetry_cell_setting            Triclinic 
_symmetry_space_group_name_H-M    P-1 
 
loop_ 
 _symmetry_equiv_pos_as_xyz 
 'x, y, z' 
 '-x, -y, -z' 
 
_cell_length_a                    8.1441(7) 
_cell_length_b                    12.4229(11) 
_cell_length_c                    12.5539(17) 
_cell_angle_alpha                 113.319(3) 
_cell_angle_beta                  96.264(3) 
_cell_angle_gamma                 106.516(2) 
_cell_volume                      1082.2(2) 
_cell_formula_units_Z             1 
_cell_measurement_temperature     293(2) 
_cell_measurement_reflns_used     3992 
_cell_measurement_theta_min       1.83 
_cell_measurement_theta_max       25.50  
 
_exptl_crystal_description       prismatic 
_exptl_crystal_colour            'light green'  
_exptl_crystal_size_max           0.21
_exptl_crystal_size_mid           0.16
_exptl_crystal_size_min           0.11
_exptl_crystal_density_meas       'not measured'
_exptl_crystal_density_diffrn     1.425 
_exptl_crystal_density_method     'not measured' 
_exptl_crystal_F_000              482 
_exptl_absorpt_coefficient_mu     0.111 
_exptl_absorpt_correction_type    empirical
_exptl_absorpt_correction_T_min   0.979  
_exptl_absorpt_correction_T_max   0.988 
_exptl_absorpt_process_details    sadabs
 
_exptl_special_details 
; 
 ? 
; 
 
_diffrn_ambient_temperature       293(2) 
_diffrn_radiation_wavelength      0.71073 
_diffrn_radiation_type            MoK\a 
_diffrn_radiation_source          'fine-focus sealed tube' 
_diffrn_radiation_monochromator   graphite 
_diffrn_measurement_device_type   'Bruker CCD APEX 2'
_diffrn_measurement_method        'hemisphere'
_diffrn_detector_area_resol_mean  ? 
_diffrn_standards_number          ? 
_diffrn_standards_interval_count  ? 
_diffrn_standards_interval_time   ? 
_diffrn_standards_decay_%         ? 
_diffrn_reflns_number             13306 
_diffrn_reflns_av_R_equivalents   0.0206 
_diffrn_reflns_av_sigmaI/netI     0.0208 
_diffrn_reflns_limit_h_min        -9 
_diffrn_reflns_limit_h_max        9 
_diffrn_reflns_limit_k_min        -15 
_diffrn_reflns_limit_k_max        15 
_diffrn_reflns_limit_l_min        -15 
_diffrn_reflns_limit_l_max        15 
_diffrn_reflns_theta_min          1.83 
_diffrn_reflns_theta_max          25.50 
_reflns_number_total              3992 
_reflns_number_gt                 3262 
_reflns_threshold_expression      >2sigma(I) 
 
_computing_data_collection        ? 
_computing_cell_refinement        ? 
_computing_data_reduction         ? 
_computing_structure_solution     'SHELXS-97 (Sheldrick, 1990)' 
_computing_structure_refinement   'SHELXL-97 (Sheldrick, 1997)' 
_computing_molecular_graphics     ? 
_computing_publication_material   ? 
 
_refine_special_details 
; 
 Refinement of F^2^ against ALL reflections.  The weighted R-factor wR and 
 goodness of fit S are based on F^2^, conventional R-factors R are based 
 on F, with F set to zero for negative F^2^. The threshold expression of 
 F^2^ > 2sigma(F^2^) is used only for calculating R-factors(gt) etc. and is 
 not relevant to the choice of reflections for refinement.  R-factors based 
 on F^2^ are statistically about twice as large as those based on F, and R- 
 factors based on ALL data will be even larger. 
# SQUEEZE RESULTS (APPEND TO CIF)
# Note: Data are Listed for all Voids in the P1 Unit Cell
# i.e. Centre of Gravity, Solvent Accessible Volume,
# Recovered number of Electrons in the Void and
# Details about the Squeezed Material
loop_
  _platon_squeeze_void_nr
  _platon_squeeze_void_average_x
  _platon_squeeze_void_average_y
  _platon_squeeze_void_average_z
  _platon_squeeze_void_volume
  _platon_squeeze_void_count_electrons
  _platon_squeeze_void_content
   1 -0.500  0.000  0.499       236        61 ' '
_platon_squeeze_details
; 
 
_refine_ls_structure_factor_coef  Fsqd  
_refine_ls_matrix_type            full 
_refine_ls_weighting_scheme       calc  
_refine_ls_weighting_details 
 'calc w=1/[\s^2^(Fo^2^)+(0.1000P)^2^+0.0000P] where P=(Fo^2^+2Fc^2^)/3' 
_atom_sites_solution_primary      direct 
_atom_sites_solution_secondary    difmap 
_atom_sites_solution_hydrogens    geom 
_refine_ls_hydrogen_treatment     mixed 
_refine_ls_extinction_method      none 
_refine_ls_extinction_coef        ? 
_refine_ls_number_reflns          3992 
_refine_ls_number_parameters      284 
_refine_ls_number_restraints      0 
_refine_ls_R_factor_all           0.0518 
_refine_ls_R_factor_gt            0.0441 
_refine_ls_wR_factor_ref          0.1584 
_refine_ls_wR_factor_gt           0.1519 
_refine_ls_goodness_of_fit_ref    1.209 
_refine_ls_restrained_S_all       1.209 
_refine_ls_shift/su_max           0.000 
_refine_ls_shift/su_mean          0.000 
 
loop_ 
 _atom_site_label 
 _atom_site_type_symbol 
 _atom_site_fract_x 
 _atom_site_fract_y 
 _atom_site_fract_z 
 _atom_site_U_iso_or_equiv 
 _atom_site_adp_type 
 _atom_site_occupancy 
 _atom_site_symmetry_multiplicity 
 _atom_site_calc_flag 
 _atom_site_refinement_flags 
 _atom_site_disorder_assembly 
 _atom_site_disorder_group 
O11 O 0.07066(18) 0.53881(16) 0.15633(17) 0.0800(5) Uani 1 1 d . . . 
O12 O 0.25047(18) 0.67085(13) 0.10696(13) 0.0629(4) Uani 1 1 d . . . 
H12O H 0.157(3) 0.7014(17) 0.1095(15) 0.050 Uiso 1 1 d . . . 
O13 O 0.36415(17) 0.17500(11) 0.13684(11) 0.0570(3) Uani 1 1 d . . . 
O14 O 0.53748(15) 0.30470(12) 0.31828(10) 0.0525(3) Uani 1 1 d . . . 
C11 C 0.33757(18) 0.43028(14) 0.17544(12) 0.0369(3) Uani 1 1 d . . . 
C12 C 0.35946(19) 0.53341(14) 0.15056(12) 0.0382(4) Uani 1 1 d . . . 
C13 C 0.5246(2) 0.59635(15) 0.14017(13) 0.0430(4) Uani 1 1 d . . . 
H13 H 0.5392 0.6644 0.1232 0.052 Uiso 1 1 calc R . . 
C14 C 0.6656(2) 0.55909(16) 0.15474(14) 0.0475(4) Uani 1 1 d . . . 
H14 H 0.7746 0.6021 0.1479 0.057 Uiso 1 1 calc R . . 
C15 C 0.6460(2) 0.45801(16) 0.17957(14) 0.0457(4) Uani 1 1 d . . . 
H15 H 0.7417 0.4333 0.1900 0.055 Uiso 1 1 calc R . . 
C16 C 0.48217(19) 0.39330(14) 0.18895(13) 0.0399(4) Uani 1 1 d . . . 
C17 C 0.2105(2) 0.57867(15) 0.13802(14) 0.0434(4) Uani 1 1 d . . . 
C18 C 0.4604(2) 0.28349(15) 0.21646(14) 0.0422(4) Uani 1 1 d . . . 
O21 O 0.3621(2) 0.57619(16) 0.41209(12) 0.0998(7) Uani 1 1 d . . . 
O22 O 0.22647(19) 0.48330(14) 0.51003(12) 0.0666(4) Uani 1 1 d . . . 
H22O H 0.308(3) 0.5511(19) 0.5695(18) 0.050 Uiso 1 1 d . . . 
O23 O 0.21074(17) 0.17139(13) -0.05098(11) 0.0590(4) Uani 1 1 d . . . 
H23O H 0.275(2) 0.1692(16) 0.0262(16) 0.050 Uiso 1 1 d . . . 
O24 O -0.00430(17) 0.22040(12) -0.11619(10) 0.0575(3) Uani 1 1 d . . . 
C21 C 0.16582(19) 0.35629(14) 0.18813(13) 0.0381(3) Uani 1 1 d . . . 
C22 C 0.12576(19) 0.38143(14) 0.29944(14) 0.0400(4) Uani 1 1 d . . . 
C23 C -0.0323(2) 0.30562(17) 0.30611(16) 0.0499(4) Uani 1 1 d . . . 
H23 H -0.0573 0.3222 0.3803 0.060 Uiso 1 1 calc R . . 
C24 C -0.1517(2) 0.20676(18) 0.20443(18) 0.0596(5) Uani 1 1 d . . . 
H24 H -0.2579 0.1581 0.2097 0.072 Uiso 1 1 calc R . . 
C25 C -0.1132(2) 0.18022(17) 0.09470(17) 0.0567(5) Uani 1 1 d . . . 
H25 H -0.1938 0.1134 0.0258 0.068 Uiso 1 1 calc R . . 
C26 C 0.0452(2) 0.25269(15) 0.08630(14) 0.0436(4) Uani 1 1 d . . . 
C27 C 0.2502(2) 0.48968(15) 0.41117(14) 0.0435(4) Uani 1 1 d . . . 
C28 C 0.0833(2) 0.21447(15) -0.03485(14) 0.0454(4) Uani 1 1 d . . . 
N1 N 0.3114(2) 0.20351(17) 0.43344(17) 0.0640(5) Uani 1 1 d . . . 
H1N H 0.420(5) 0.263(3) 0.408(3) 0.144(12) Uiso 1 1 d . . . 
C1 C 0.2942(4) 0.2381(3) 0.5434(2) 0.1035(10) Uani 1 1 d . . . 
H1 H 0.3667 0.3169 0.6033 0.124 Uiso 1 1 calc R . . 
C2 C 0.1709(3) 0.1596(2) 0.5710(2) 0.0881(8) Uani 1 1 d . . . 
H2 H 0.1601 0.1856 0.6495 0.106 Uiso 1 1 calc R . . 
C3 C 0.0641(2) 0.04424(15) 0.48508(14) 0.0462(4) Uani 1 1 d . . . 
C4 C 0.0829(4) 0.0140(2) 0.37151(19) 0.0899(8) Uani 1 1 d . . . 
H4 H 0.0094 -0.0629 0.3091 0.108 Uiso 1 1 calc R . . 
C5 C 0.2090(4) 0.0957(2) 0.3480(2) 0.0864(7) Uani 1 1 d . . . 
H5 H 0.2209 0.0734 0.2701 0.104 Uiso 1 1 calc R . . 
 
loop_ 
 _atom_site_aniso_label 
 _atom_site_aniso_U_11 
 _atom_site_aniso_U_22 
 _atom_site_aniso_U_33 
 _atom_site_aniso_U_23 
 _atom_site_aniso_U_13 
 _atom_site_aniso_U_12 
O11 0.0515(8) 0.0942(11) 0.1384(14) 0.0835(11) 0.0431(8) 0.0350(8) 
O12 0.0573(8) 0.0642(9) 0.0850(10) 0.0481(8) 0.0226(7) 0.0237(7) 
O13 0.0625(8) 0.0468(7) 0.0528(7) 0.0204(6) 0.0032(6) 0.0143(6) 
O14 0.0544(7) 0.0616(8) 0.0423(7) 0.0298(6) 0.0117(5) 0.0125(6) 
C11 0.0356(7) 0.0404(8) 0.0274(7) 0.0119(6) 0.0094(6) 0.0079(6) 
C12 0.0401(8) 0.0404(8) 0.0274(7) 0.0132(6) 0.0094(6) 0.0078(6) 
C13 0.0456(9) 0.0450(9) 0.0340(8) 0.0197(7) 0.0114(6) 0.0066(7) 
C14 0.0370(8) 0.0575(10) 0.0425(9) 0.0245(8) 0.0135(7) 0.0049(7) 
C15 0.0367(8) 0.0574(10) 0.0417(9) 0.0231(8) 0.0113(7) 0.0130(7) 
C16 0.0398(8) 0.0460(9) 0.0315(7) 0.0178(7) 0.0110(6) 0.0105(7) 
C17 0.0441(8) 0.0436(9) 0.0390(8) 0.0189(7) 0.0105(6) 0.0103(7) 
C18 0.0386(8) 0.0497(10) 0.0408(9) 0.0220(8) 0.0143(7) 0.0151(7) 
O21 0.1166(13) 0.0737(10) 0.0418(8) 0.0110(7) 0.0211(8) -0.0389(9) 
O22 0.0715(9) 0.0674(9) 0.0405(7) 0.0249(7) 0.0097(6) -0.0030(7) 
O23 0.0630(8) 0.0684(9) 0.0401(7) 0.0160(6) 0.0099(6) 0.0293(7) 
O24 0.0652(8) 0.0611(8) 0.0420(7) 0.0210(6) 0.0064(6) 0.0225(6) 
C21 0.0369(7) 0.0377(8) 0.0405(8) 0.0194(7) 0.0126(6) 0.0106(6) 
C22 0.0390(8) 0.0394(8) 0.0429(9) 0.0197(7) 0.0145(6) 0.0125(7) 
C23 0.0467(9) 0.0539(10) 0.0525(10) 0.0273(9) 0.0240(8) 0.0136(8) 
C24 0.0435(9) 0.0595(11) 0.0669(12) 0.0305(10) 0.0186(8) 0.0011(8) 
C25 0.0449(9) 0.0497(10) 0.0552(11) 0.0183(9) 0.0054(8) -0.0011(8) 
C26 0.0396(8) 0.0417(9) 0.0430(9) 0.0180(7) 0.0071(7) 0.0080(7) 
C27 0.0458(8) 0.0437(9) 0.0417(9) 0.0199(7) 0.0196(7) 0.0126(7) 
C28 0.0465(9) 0.0369(8) 0.0412(9) 0.0137(7) 0.0052(7) 0.0062(7) 
N1 0.0545(9) 0.0668(11) 0.0822(12) 0.0495(10) 0.0217(8) 0.0128(8) 
C1 0.0991(18) 0.0848(17) 0.0682(15) 0.0284(13) 0.0100(13) -0.0361(14) 
C2 0.0891(15) 0.0710(14) 0.0505(11) 0.0158(11) 0.0129(10) -0.0280(12) 
C3 0.0471(9) 0.0426(9) 0.0410(9) 0.0153(7) 0.0134(7) 0.0091(7) 
C4 0.1153(19) 0.0609(13) 0.0490(12) 0.0098(10) 0.0345(12) -0.0141(13) 
C5 0.116(2) 0.0754(16) 0.0651(14) 0.0348(13) 0.0479(14) 0.0157(15) 
 
_geom_special_details 
; 
 All esds (except the esd in the dihedral angle between two l.s. planes) 
 are estimated using the full covariance matrix.  The cell esds are taken 
 into account individually in the estimation of esds in distances, angles 
 and torsion angles; correlations between esds in cell parameters are only 
 used when they are defined by crystal symmetry.  An approximate (isotropic) 
 treatment of cell esds is used for estimating esds involving l.s. planes. 
; 
 
loop_ 
 _geom_bond_atom_site_label_1 
 _geom_bond_atom_site_label_2 
 _geom_bond_distance 
 _geom_bond_site_symmetry_2 
 _geom_bond_publ_flag 
O11 C17 1.193(2) . ? 
O12 C17 1.3185(19) . ? 
O13 C18 1.262(2) . ? 
O14 C18 1.2495(19) . ? 
C11 C16 1.397(2) . ? 
C11 C12 1.404(2) . ? 
C11 C21 1.5035(19) . ? 
C12 C13 1.400(2) . ? 
C12 C17 1.493(2) . ? 
C13 C14 1.374(2) . ? 
C14 C15 1.381(2) . ? 
C15 C16 1.393(2) . ? 
C16 C18 1.504(2) . ? 
O21 C27 1.190(2) . ? 
O22 C27 1.3058(18) . ? 
O23 C28 1.297(2) . ? 
O24 C28 1.2196(19) . ? 
C21 C26 1.400(2) . ? 
C21 C22 1.403(2) . ? 
C22 C23 1.396(2) . ? 
C22 C27 1.491(2) . ? 
C23 C24 1.376(3) . ? 
C24 C25 1.378(3) . ? 
C25 C26 1.390(2) . ? 
C26 C28 1.500(2) . ? 
N1 C5 1.293(3) . ? 
N1 C1 1.310(3) . ? 
C1 C2 1.366(3) . ? 
C2 C3 1.356(3) . ? 
C3 C4 1.361(3) . ? 
C3 C3 1.483(3) 2_556 ? 
C4 C5 1.372(3) . ? 
 
loop_ 
 _geom_angle_atom_site_label_1 
 _geom_angle_atom_site_label_2 
 _geom_angle_atom_site_label_3 
 _geom_angle 
 _geom_angle_site_symmetry_1 
 _geom_angle_site_symmetry_3 
 _geom_angle_publ_flag 
C16 C11 C12 118.75(13) . . ? 
C16 C11 C21 117.72(13) . . ? 
C12 C11 C21 123.54(13) . . ? 
C13 C12 C11 119.39(14) . . ? 
C13 C12 C17 119.64(13) . . ? 
C11 C12 C17 120.96(13) . . ? 
C14 C13 C12 120.95(14) . . ? 
C13 C14 C15 120.26(14) . . ? 
C14 C15 C16 119.66(14) . . ? 
C15 C16 C11 121.00(14) . . ? 
C15 C16 C18 119.83(13) . . ? 
C11 C16 C18 119.16(12) . . ? 
O11 C17 O12 122.63(16) . . ? 
O11 C17 C12 124.46(14) . . ? 
O12 C17 C12 112.89(13) . . ? 
O14 C18 O13 123.12(14) . . ? 
O14 C18 C16 118.03(14) . . ? 
O13 C18 C16 118.84(13) . . ? 
C26 C21 C22 118.12(13) . . ? 
C26 C21 C11 119.07(13) . . ? 
C22 C21 C11 122.67(13) . . ? 
C23 C22 C21 120.02(15) . . ? 
C23 C22 C27 119.46(14) . . ? 
C21 C22 C27 120.51(13) . . ? 
C24 C23 C22 120.90(15) . . ? 
C23 C24 C25 119.68(15) . . ? 
C24 C25 C26 120.38(16) . . ? 
C25 C26 C21 120.83(15) . . ? 
C25 C26 C28 117.66(14) . . ? 
C21 C26 C28 121.50(13) . . ? 
O21 C27 O22 121.76(17) . . ? 
O21 C27 C22 123.63(14) . . ? 
O22 C27 C22 114.61(13) . . ? 
O24 C28 O23 120.97(15) . . ? 
O24 C28 C26 121.77(15) . . ? 
O23 C28 C26 117.23(13) . . ? 
C5 N1 C1 120.76(17) . . ? 
N1 C1 C2 120.8(2) . . ? 
C3 C2 C1 120.5(2) . . ? 
C2 C3 C4 116.62(17) . . ? 
C2 C3 C3 121.09(19) . 2_556 ? 
C4 C3 C3 122.28(19) . 2_556 ? 
C3 C4 C5 120.8(2) . . ? 
N1 C5 C4 120.5(2) . . ? 
 
_diffrn_measured_fraction_theta_max    0.994 
_diffrn_reflns_theta_full              25.50 
_diffrn_measured_fraction_theta_full   0.994 
_refine_diff_density_max    0.299 
_refine_diff_density_min   -0.214 
_refine_diff_density_rms    0.035 
 
data_8 
 
_audit_creation_method            SHELXL-97 
_chemical_name_systematic 
; 
 ? 
; 
_chemical_name_common             ? 
_chemical_melting_point           ? 
_chemical_formula_moiety          ? 
_chemical_formula_sum 
 'C49 H38 N2 O18' 
_chemical_formula_weight          942.81 
 
loop_ 
 _atom_type_symbol 
 _atom_type_description 
 _atom_type_scat_dispersion_real 
 _atom_type_scat_dispersion_imag 
 _atom_type_scat_source 
 'C'  'C'   0.0033   0.0016 
 'International Tables Vol C Tables 4.2.6.8 and 6.1.1.4' 
 'H'  'H'   0.0000   0.0000 
 'International Tables Vol C Tables 4.2.6.8 and 6.1.1.4' 
 'N'  'N'   0.0061   0.0033 
 'International Tables Vol C Tables 4.2.6.8 and 6.1.1.4' 
 'O'  'O'   0.0106   0.0060 
 'International Tables Vol C Tables 4.2.6.8 and 6.1.1.4' 
 
_symmetry_cell_setting            Triclinic
_symmetry_space_group_name_H-M    P-1 
 
loop_ 
 _symmetry_equiv_pos_as_xyz 
 'x, y, z' 
 '-x, -y, -z' 
 
_cell_length_a                    8.103(3) 
_cell_length_b                    12.474(8) 
_cell_length_c                    12.498(5) 
_cell_angle_alpha                 112.704(19) 
_cell_angle_beta                  106.631(14) 
_cell_angle_gamma                 96.29(2) 
_cell_volume                      1081.4(9) 
_cell_formula_units_Z             1 
_cell_measurement_temperature     296(2) 
_cell_measurement_reflns_used     2824   
_cell_measurement_theta_min       1.83  
_cell_measurement_theta_max       23.87   
 
_exptl_crystal_description       block  
_exptl_crystal_colour            'bright yellow'   
_exptl_crystal_size_max           0.20 
_exptl_crystal_size_mid           0.15 
_exptl_crystal_size_min           0.11 
_exptl_crystal_density_meas       'not measured' 
_exptl_crystal_density_diffrn     1.448 
_exptl_crystal_density_method     'not measured' 
_exptl_crystal_F_000              490 
_exptl_absorpt_coefficient_mu     0.112 
_exptl_absorpt_correction_type    empirical 
_exptl_absorpt_correction_T_min   0.980 
_exptl_absorpt_correction_T_max   0.988
_exptl_absorpt_process_details    sadabs
 
_exptl_special_details 
; 
 ? 
; 
 
_diffrn_ambient_temperature       296(2) 
_diffrn_radiation_wavelength      0.71073 
_diffrn_radiation_type            MoK\a 
_diffrn_radiation_source          'fine-focus sealed tube' 
_diffrn_radiation_monochromator   graphite 
_diffrn_measurement_device_type   'Bruker CCD APEX 2' 
_diffrn_measurement_method        'hemisphere' 
_diffrn_detector_area_resol_mean  ? 
_diffrn_standards_number          ? 
_diffrn_standards_interval_count  ? 
_diffrn_standards_interval_time   ? 
_diffrn_standards_decay_%         ? 
_diffrn_reflns_number             15354 
_diffrn_reflns_av_R_equivalents   0.0413 
_diffrn_reflns_av_sigmaI/netI     0.0308 
_diffrn_reflns_limit_h_min        -9 
_diffrn_reflns_limit_h_max        9 
_diffrn_reflns_limit_k_min        -11 
_diffrn_reflns_limit_k_max        14 
_diffrn_reflns_limit_l_min        -14 
_diffrn_reflns_limit_l_max        13 
_diffrn_reflns_theta_min          1.83 
_diffrn_reflns_theta_max          23.87 
_reflns_number_total              2824 
_reflns_number_gt                 2194 
_reflns_threshold_expression      >2sigma(I) 
 
_computing_data_collection        ? 
_computing_cell_refinement        ? 
_computing_data_reduction         ? 
_computing_structure_solution     'SHELXS-97 (Sheldrick, 1990)' 
_computing_structure_refinement   'SHELXL-97 (Sheldrick, 1997)' 
_computing_molecular_graphics     ? 
_computing_publication_material   ? 
 
_refine_special_details 
; 
 Refinement of F^2^ against ALL reflections.  The weighted R-factor wR and 
 goodness of fit S are based on F^2^, conventional R-factors R are based 
 on F, with F set to zero for negative F^2^. The threshold expression of 
 F^2^ > 2sigma(F^2^) is used only for calculating R-factors(gt) etc. and is 
 not relevant to the choice of reflections for refinement.  R-factors based 
 on F^2^ are statistically about twice as large as those based on F, and R- 
 factors based on ALL data will be even larger. 
; 
 
_refine_ls_structure_factor_coef  Fsqd  
_refine_ls_matrix_type            full 
_refine_ls_weighting_scheme       calc  
_refine_ls_weighting_details 
 'calc w=1/[\s^2^(Fo^2^)+(0.1000P)^2^+0.0000P] where P=(Fo^2^+2Fc^2^)/3' 
_atom_sites_solution_primary      direct 
_atom_sites_solution_secondary    difmap 
_atom_sites_solution_hydrogens    geom 
_refine_ls_hydrogen_treatment     mixed 
_refine_ls_extinction_method      SHELXL 
_refine_ls_extinction_coef        0.009(4) 
_refine_ls_extinction_expression 
 'Fc^*^=kFc[1+0.001xFc^2^\l^3^/sin(2\q)]^-1/4^' 
_refine_ls_number_reflns          2824 
_refine_ls_number_parameters      281 
_refine_ls_number_restraints      0 
_refine_ls_R_factor_all           0.0609 
_refine_ls_R_factor_gt            0.0467 
_refine_ls_wR_factor_ref          0.1550 
_refine_ls_wR_factor_gt           0.1435 
_refine_ls_goodness_of_fit_ref    1.169 
_refine_ls_restrained_S_all       1.169 
_refine_ls_shift/su_max           0.001 
_refine_ls_shift/su_mean          0.000 
 
loop_ 
 _atom_site_label 
 _atom_site_type_symbol 
 _atom_site_fract_x 
 _atom_site_fract_y 
 _atom_site_fract_z 
 _atom_site_U_iso_or_equiv 
 _atom_site_adp_type 
 _atom_site_occupancy 
 _atom_site_symmetry_multiplicity 
 _atom_site_calc_flag 
 _atom_site_refinement_flags 
 _atom_site_disorder_assembly 
 _atom_site_disorder_group 
O11 O 0.3586(3) 0.90969(16) 0.5749(2) 0.1006(9) Uani 1 1 d . . . 
O12 O 0.2282(2) 1.01026(14) 0.48360(16) 0.0651(6) Uani 1 1 d . . . 
H12O H 0.3023 1.0735 0.5662 0.050 Uiso 1 1 d . . . 
O13 O 0.2131(2) 0.44858(15) 0.17338(16) 0.0550(5) Uani 1 1 d . . . 
H13O H 0.269(3) 0.519(2) 0.175(2) 0.050 Uiso 1 1 d . . . 
O14 O -0.0042(2) 0.38384(15) 0.22159(15) 0.0544(5) Uani 1 1 d . . . 
C11 C 0.1664(3) 0.68790(19) 0.35613(19) 0.0354(6) Uani 1 1 d . . . 
C12 C 0.0464(3) 0.58674(19) 0.2535(2) 0.0389(6) Uani 1 1 d . . . 
C13 C -0.1118(3) 0.5967(2) 0.1817(2) 0.0512(7) Uani 1 1 d . . . 
H13 H -0.1927 0.5285 0.1151 0.061 Uiso 1 1 calc R . . 
C14 C -0.1495(3) 0.7069(2) 0.2085(2) 0.0545(7) Uani 1 1 d . . . 
H14 H -0.2558 0.7130 0.1601 0.065 Uiso 1 1 calc R . . 
C15 C -0.0306(3) 0.8078(2) 0.3064(2) 0.0465(6) Uani 1 1 d . . . 
H15 H -0.0554 0.8824 0.3228 0.056 Uiso 1 1 calc R . . 
C16 C 0.1259(3) 0.79965(19) 0.38123(19) 0.0363(6) Uani 1 1 d . . . 
C17 C 0.2483(3) 0.9101(2) 0.4883(2) 0.0416(6) Uani 1 1 d . . . 
C18 C 0.0844(3) 0.4660(2) 0.2159(2) 0.0431(6) Uani 1 1 d . . . 
O21 O 0.0693(3) 0.6527(2) 0.5358(2) 0.0830(7) Uani 1 1 d . . . 
O22 O 0.2468(2) 0.60165(17) 0.66611(18) 0.0658(6) Uani 1 1 d . . . 
H22O H 0.149(3) 0.6124(19) 0.697(2) 0.050 Uiso 1 1 d . . . 
O23 O 0.5389(2) 0.82010(14) 0.30663(15) 0.0517(5) Uani 1 1 d . . . 
O24 O 0.3683(2) 0.63834(15) 0.17831(15) 0.0539(5) Uani 1 1 d . . . 
C21 C 0.3385(3) 0.67423(17) 0.43031(19) 0.0334(6) Uani 1 1 d . . . 
C22 C 0.3597(3) 0.64846(17) 0.53189(19) 0.0345(6) Uani 1 1 d . . . 
C23 C 0.5256(3) 0.63938(19) 0.5957(2) 0.0399(6) Uani 1 1 d . . . 
H23 H 0.5400 0.6226 0.6637 0.048 Uiso 1 1 calc R . . 
C24 C 0.6680(3) 0.65490(19) 0.5598(2) 0.0454(7) Uani 1 1 d . . . 
H24 H 0.7776 0.6483 0.6031 0.054 Uiso 1 1 calc R . . 
C25 C 0.6485(3) 0.68033(19) 0.4595(2) 0.0432(6) Uani 1 1 d . . . 
H25 H 0.7452 0.6915 0.4356 0.052 Uiso 1 1 calc R . . 
C26 C 0.4840(3) 0.68924(18) 0.3939(2) 0.0365(6) Uani 1 1 d . . . 
C27 C 0.2098(3) 0.6355(2) 0.5759(2) 0.0422(6) Uani 1 1 d . . . 
C28 C 0.4629(3) 0.7172(2) 0.2853(2) 0.0394(6) Uani 1 1 d . . . 
C3A C 0.0643(3) 0.98497(19) 0.0444(2) 0.0410(6) Uani 1 1 d . . . 
C2A C 0.1690(4) 1.0701(3) 0.1592(3) 0.0722(9) Uani 1 1 d . . . 
H1A H 0.1576 1.1486 0.1839 0.087 Uiso 1 1 calc R . . 
C1A C 0.2897(4) 1.0432(3) 0.2384(3) 0.0842(10) Uani 1 1 d . . . 
H2A H 0.3595 1.1028 0.3170 0.101 Uiso 1 1 calc R . . 
N1A N 0.3090(3) 0.9331(3) 0.2047(2) 0.0622(7) Uani 1 1 d . . . 
H1AN H 0.401(3) 0.911(2) 0.256(2) 0.050 Uiso 1 1 d . . . 
C5A C 0.2097(5) 0.8474(3) 0.0975(3) 0.0774(9) Uani 1 1 d . . . 
H4A H 0.2236 0.7697 0.0761 0.093 Uiso 1 1 calc R . . 
C4A C 0.0842(5) 0.8712(3) 0.0156(3) 0.0795(10) Uani 1 1 d . . . 
H5A H 0.0117 0.8089 -0.0607 0.095 Uiso 1 1 calc R . . 
 
loop_ 
 _atom_site_aniso_label 
 _atom_site_aniso_U_11 
 _atom_site_aniso_U_22 
 _atom_site_aniso_U_33 
 _atom_site_aniso_U_23 
 _atom_site_aniso_U_13 
 _atom_site_aniso_U_12 
O11 0.1211(19) 0.0417(12) 0.0733(14) 0.0090(10) -0.0361(14) 0.0257(12) 
O12 0.0735(13) 0.0403(11) 0.0609(12) 0.0237(9) -0.0047(10) 0.0088(9) 
O13 0.0571(12) 0.0384(10) 0.0671(12) 0.0170(9) 0.0290(10) 0.0077(8) 
O14 0.0580(11) 0.0449(10) 0.0583(11) 0.0218(9) 0.0216(9) 0.0063(9) 
C11 0.0330(13) 0.0401(13) 0.0356(13) 0.0191(11) 0.0110(11) 0.0120(11) 
C12 0.0355(13) 0.0405(14) 0.0384(14) 0.0181(12) 0.0088(11) 0.0096(11) 
C13 0.0417(15) 0.0504(16) 0.0458(15) 0.0154(13) 0.0043(12) 0.0041(12) 
C14 0.0394(15) 0.0626(18) 0.0575(17) 0.0294(15) 0.0044(13) 0.0214(13) 
C15 0.0433(15) 0.0472(15) 0.0486(15) 0.0218(13) 0.0113(13) 0.0209(12) 
C16 0.0344(13) 0.0401(14) 0.0346(13) 0.0167(11) 0.0109(11) 0.0130(11) 
C17 0.0416(14) 0.0454(15) 0.0369(14) 0.0189(12) 0.0077(12) 0.0214(12) 
C18 0.0401(14) 0.0425(15) 0.0387(14) 0.0157(12) 0.0087(12) 0.0032(12) 
O21 0.0508(12) 0.148(2) 0.1000(16) 0.0908(16) 0.0371(11) 0.0465(13) 
O22 0.0575(12) 0.0938(15) 0.0755(14) 0.0580(12) 0.0327(11) 0.0275(11) 
O23 0.0538(11) 0.0428(11) 0.0592(11) 0.0291(9) 0.0124(9) 0.0104(8) 
O24 0.0585(11) 0.0516(11) 0.0442(11) 0.0191(9) 0.0142(9) 0.0044(9) 
C21 0.0326(13) 0.0263(12) 0.0362(13) 0.0114(10) 0.0082(10) 0.0087(9) 
C22 0.0333(13) 0.0282(12) 0.0368(13) 0.0122(10) 0.0082(11) 0.0075(10) 
C23 0.0414(15) 0.0357(13) 0.0422(13) 0.0196(11) 0.0102(11) 0.0110(10) 
C24 0.0335(14) 0.0436(14) 0.0552(16) 0.0248(13) 0.0049(12) 0.0132(11) 
C25 0.0361(14) 0.0405(14) 0.0533(15) 0.0213(12) 0.0147(12) 0.0109(11) 
C26 0.0366(14) 0.0307(12) 0.0424(13) 0.0177(11) 0.0109(11) 0.0115(10) 
C27 0.0429(16) 0.0431(14) 0.0398(14) 0.0206(12) 0.0092(12) 0.0138(11) 
C28 0.0318(13) 0.0396(15) 0.0486(16) 0.0216(13) 0.0120(12) 0.0137(11) 
C3A 0.0437(14) 0.0386(14) 0.0387(14) 0.0165(12) 0.0112(12) 0.0141(11) 
C2A 0.0736(19) 0.0491(17) 0.0624(19) 0.0205(15) -0.0143(16) 0.0165(15) 
C1A 0.078(2) 0.064(2) 0.074(2) 0.0276(17) -0.0168(17) 0.0093(17) 
N1A 0.0502(14) 0.087(2) 0.0662(17) 0.0541(17) 0.0135(13) 0.0225(14) 
C5A 0.102(2) 0.0592(19) 0.072(2) 0.0341(19) 0.017(2) 0.0425(19) 
C4A 0.107(3) 0.0540(19) 0.0510(17) 0.0168(15) -0.0045(17) 0.0336(17) 
 
_geom_special_details 
; 
 All esds (except the esd in the dihedral angle between two l.s. planes) 
 are estimated using the full covariance matrix.  The cell esds are taken 
 into account individually in the estimation of esds in distances, angles 
 and torsion angles; correlations between esds in cell parameters are only 
 used when they are defined by crystal symmetry.  An approximate (isotropic) 
 treatment of cell esds is used for estimating esds involving l.s. planes. 
; 
 
loop_ 
 _geom_bond_atom_site_label_1 
 _geom_bond_atom_site_label_2 
 _geom_bond_distance 
 _geom_bond_site_symmetry_2 
 _geom_bond_publ_flag 
O11 C17 1.192(3) . ? 
O12 C17 1.299(3) . ? 
O13 C18 1.301(3) . ? 
O14 C18 1.223(3) . ? 
C11 C12 1.397(3) . ? 
C11 C16 1.404(3) . ? 
C11 C21 1.505(3) . ? 
C12 C13 1.388(3) . ? 
C12 C18 1.490(3) . ? 
C13 C14 1.375(3) . ? 
C14 C15 1.371(3) . ? 
C15 C16 1.384(3) . ? 
C16 C17 1.480(3) . ? 
O21 C27 1.184(3) . ? 
O22 C27 1.320(3) . ? 
O23 C28 1.252(3) . ? 
O24 C28 1.255(3) . ? 
C21 C22 1.395(3) . ? 
C21 C26 1.398(3) . ? 
C22 C23 1.395(3) . ? 
C22 C27 1.487(3) . ? 
C23 C24 1.373(3) . ? 
C24 C25 1.379(3) . ? 
C25 C26 1.392(3) . ? 
C26 C28 1.496(3) . ? 
C3A C2A 1.355(4) . ? 
C3A C4A 1.364(3) . ? 
C3A C3A 1.484(4) 2_575 ? 
C2A C1A 1.350(4) . ? 
C1A N1A 1.313(4) . ? 
N1A C5A 1.294(4) . ? 
C5A C4A 1.369(4) . ? 
 
loop_ 
 _geom_angle_atom_site_label_1 
 _geom_angle_atom_site_label_2 
 _geom_angle_atom_site_label_3 
 _geom_angle 
 _geom_angle_site_symmetry_1 
 _geom_angle_site_symmetry_3 
 _geom_angle_publ_flag 
C12 C11 C16 118.28(19) . . ? 
C12 C11 C21 118.97(19) . . ? 
C16 C11 C21 122.64(19) . . ? 
C13 C12 C11 120.4(2) . . ? 
C13 C12 C18 117.9(2) . . ? 
C11 C12 C18 121.69(19) . . ? 
C14 C13 C12 120.4(2) . . ? 
C15 C14 C13 120.1(2) . . ? 
C14 C15 C16 120.6(2) . . ? 
C15 C16 C11 120.3(2) . . ? 
C15 C16 C17 119.0(2) . . ? 
C11 C16 C17 120.76(19) . . ? 
O11 C17 O12 120.9(2) . . ? 
O11 C17 C16 123.4(2) . . ? 
O12 C17 C16 115.73(19) . . ? 
O14 C18 O13 120.1(2) . . ? 
O14 C18 C12 121.7(2) . . ? 
O13 C18 C12 118.2(2) . . ? 
C22 C21 C26 119.16(19) . . ? 
C22 C21 C11 123.85(19) . . ? 
C26 C21 C11 116.99(18) . . ? 
C23 C22 C21 119.4(2) . . ? 
C23 C22 C27 119.7(2) . . ? 
C21 C22 C27 120.82(19) . . ? 
C24 C23 C22 121.0(2) . . ? 
C23 C24 C25 120.1(2) . . ? 
C24 C25 C26 120.0(2) . . ? 
C25 C26 C21 120.4(2) . . ? 
C25 C26 C28 120.0(2) . . ? 
C21 C26 C28 119.62(19) . . ? 
O21 C27 O22 121.7(2) . . ? 
O21 C27 C22 125.0(2) . . ? 
O22 C27 C22 113.4(2) . . ? 
O23 C28 O24 123.1(2) . . ? 
O23 C28 C26 117.7(2) . . ? 
O24 C28 C26 119.2(2) . . ? 
C2A C3A C4A 116.3(2) . . ? 
C2A C3A C3A 121.4(3) . 2_575 ? 
C4A C3A C3A 122.3(3) . 2_575 ? 
C1A C2A C3A 121.3(3) . . ? 
N1A C1A C2A 120.3(3) . . ? 
C5A N1A C1A 121.3(2) . . ? 
N1A C5A C4A 120.0(3) . . ? 
C3A C4A C5A 120.8(3) . . ? 
 
_diffrn_measured_fraction_theta_max    0.844 
_diffrn_reflns_theta_full              23.87 
_diffrn_measured_fraction_theta_full   0.844 
_refine_diff_density_max    0.248 
_refine_diff_density_min   -0.230 
_refine_diff_density_rms    0.040 

 
data_9 
 
_audit_creation_method            SHELXL-97 
_chemical_name_systematic 
; 
 ? 
; 
_chemical_name_common             ? 
_chemical_melting_point           ? 
_chemical_formula_moiety          ? 
_chemical_formula_sum 
 'C49 H38 N2 O18' 
_chemical_formula_weight          942.81 
 
loop_ 
 _atom_type_symbol 
 _atom_type_description 
 _atom_type_scat_dispersion_real 
 _atom_type_scat_dispersion_imag 
 _atom_type_scat_source 
 'C'  'C'   0.0033   0.0016 
 'International Tables Vol C Tables 4.2.6.8 and 6.1.1.4' 
 'H'  'H'   0.0000   0.0000 
 'International Tables Vol C Tables 4.2.6.8 and 6.1.1.4' 
 'N'  'N'   0.0061   0.0033 
 'International Tables Vol C Tables 4.2.6.8 and 6.1.1.4' 
 'O'  'O'   0.0106   0.0060 
 'International Tables Vol C Tables 4.2.6.8 and 6.1.1.4' 
 
_symmetry_cell_setting            Triclinic 
_symmetry_space_group_name_H-M    P-1
 
loop_ 
 _symmetry_equiv_pos_as_xyz 
 'x, y, z' 
 '-x, -y, -z' 
 
_cell_length_a                    12.7869(10) 
_cell_length_b                    14.4399(12) 
_cell_length_c                    14.8308(12) 
_cell_angle_alpha                 116.417(2) 
_cell_angle_beta                  96.957(2) 
_cell_angle_gamma                 109.554(2) 
_cell_volume                      2189.5(3) 
_cell_formula_units_Z             2 
_cell_measurement_temperature     293(2) 
_cell_measurement_reflns_used     6817  
_cell_measurement_theta_min       1.75 
_cell_measurement_theta_max       24.03 
 
_exptl_crystal_description       needle 
_exptl_crystal_colour            'dark yellow'  
_exptl_crystal_size_max           0.20
_exptl_crystal_size_mid           0.16
_exptl_crystal_size_min           0.13
_exptl_crystal_density_meas      'not measured'
_exptl_crystal_density_diffrn     1.430 
_exptl_crystal_density_method     'not measured' 
_exptl_crystal_F_000              980 
_exptl_absorpt_coefficient_mu     0.111 
_exptl_absorpt_correction_type    empirical
_exptl_absorpt_correction_T_min   0.979 
_exptl_absorpt_correction_T_max   0.986 
_exptl_absorpt_process_details    sadabs
 
_exptl_special_details 
; 
 ? 
; 
 
_diffrn_ambient_temperature       293(2) 
_diffrn_radiation_wavelength      0.71073 
_diffrn_radiation_type            MoK\a 
_diffrn_radiation_source          'fine-focus sealed tube' 
_diffrn_radiation_monochromator   graphite 
_diffrn_measurement_device_type   'Bruker CCD APEX 2'
_diffrn_measurement_method         'hemisphere'
_diffrn_detector_area_resol_mean  ? 
_diffrn_standards_number          ? 
_diffrn_standards_interval_count  ? 
_diffrn_standards_interval_time   ? 
_diffrn_standards_decay_%         ? 
_diffrn_reflns_number             23746 
_diffrn_reflns_av_R_equivalents   0.0559 
_diffrn_reflns_av_sigmaI/netI     0.0597 
_diffrn_reflns_limit_h_min        -14 
_diffrn_reflns_limit_h_max        14 
_diffrn_reflns_limit_k_min        -16 
_diffrn_reflns_limit_k_max        16 
_diffrn_reflns_limit_l_min        -16 
_diffrn_reflns_limit_l_max        16 
_diffrn_reflns_theta_min          1.75 
_diffrn_reflns_theta_max          24.03 
_reflns_number_total              6817 
_reflns_number_gt                 3731 
_reflns_threshold_expression      >2sigma(I) 
 
_computing_data_collection        ? 
_computing_cell_refinement        ? 
_computing_data_reduction         ? 
_computing_structure_solution     'SHELXS-97 (Sheldrick, 1990)' 
_computing_structure_refinement   'SHELXL-97 (Sheldrick, 1997)' 
_computing_molecular_graphics     ? 
_computing_publication_material   ? 
 
_refine_special_details 
; 
 Refinement of F^2^ against ALL reflections.  The weighted R-factor wR and 
 goodness of fit S are based on F^2^, conventional R-factors R are based 
 on F, with F set to zero for negative F^2^. The threshold expression of 
 F^2^ > 2sigma(F^2^) is used only for calculating R-factors(gt) etc. and is 
 not relevant to the choice of reflections for refinement.  R-factors based 
 on F^2^ are statistically about twice as large as those based on F, and R- 
 factors based on ALL data will be even larger. 
; 
 
_refine_ls_structure_factor_coef  Fsqd  
_refine_ls_matrix_type            full 
_refine_ls_weighting_scheme       calc  
_refine_ls_weighting_details 
 'calc w=1/[\s^2^(Fo^2^)+(0.0901P)^2^+2.4595P] where P=(Fo^2^+2Fc^2^)/3' 
_atom_sites_solution_primary      direct 
_atom_sites_solution_secondary    difmap 
_atom_sites_solution_hydrogens    geom 
_refine_ls_hydrogen_treatment     mixed 
_refine_ls_extinction_method      none 
_refine_ls_extinction_coef        ? 
_refine_ls_number_reflns          6817 
_refine_ls_number_parameters      610 
_refine_ls_number_restraints      0 
_refine_ls_R_factor_all           0.1331 
_refine_ls_R_factor_gt            0.0693 
_refine_ls_wR_factor_ref          0.1961 
_refine_ls_wR_factor_gt           0.1665 
_refine_ls_goodness_of_fit_ref    0.907 
_refine_ls_restrained_S_all       0.907 
_refine_ls_shift/su_max           0.005 
_refine_ls_shift/su_mean          0.000 
 
loop_ 
 _atom_site_label 
 _atom_site_type_symbol 
 _atom_site_fract_x 
 _atom_site_fract_y 
 _atom_site_fract_z 
 _atom_site_U_iso_or_equiv 
 _atom_site_adp_type 
 _atom_site_occupancy 
 _atom_site_symmetry_multiplicity 
 _atom_site_calc_flag 
 _atom_site_refinement_flags 
 _atom_site_disorder_assembly 
 _atom_site_disorder_group 
C51 C 0.1765(3) 0.9717(3) 0.7496(4) 0.0490(11) Uani 1 1 d . . . 
O1P O 0.1482(4) 0.6402(4) 0.7971(4) 0.1235(16) Uani 1 1 d . . . 
C54 C -0.0820(10) 0.2237(6) 0.5995(7) 0.203(5) Uani 1 1 d . . . 
H54A H -0.0178 0.2135 0.6277 0.305 Uiso 1 1 calc R . . 
H54B H -0.0880 0.2047 0.5276 0.305 Uiso 1 1 calc R . . 
H54C H -0.1534 0.1742 0.6005 0.305 Uiso 1 1 calc R . . 
O1W O 0.1339(3) 0.8382(3) 0.9116(3) 0.0842(11) Uiso 1 1 d . . . 
O4 O 0.7639(2) 0.7967(2) 0.7754(2) 0.0504(7) Uani 1 1 d . . . 
O3 O 0.6221(2) 0.6189(2) 0.6866(2) 0.0533(8) Uani 1 1 d . . . 
O15 O 0.4741(3) 0.6482(2) 0.4341(2) 0.0637(9) Uani 1 1 d . . . 
O16 O 0.5876(2) 0.5588(2) 0.4125(2) 0.0628(9) Uani 1 1 d . . . 
C9 C 0.6845(3) 0.8468(3) 0.6160(3) 0.0375(9) Uani 1 1 d . . . 
O6 O 0.8337(3) 1.1367(2) 0.8137(3) 0.0708(10) Uani 1 1 d . . . 
C19 C 0.5823(3) 0.8290(3) 0.6579(3) 0.0343(9) Uani 1 1 d . . . 
O5 O 0.7995(3) 1.0042(2) 0.8573(2) 0.0595(8) Uani 1 1 d . . . 
C50 C 0.4975(3) 0.8655(3) 0.6410(3) 0.0397(9) Uani 1 1 d . . . 
O2 O 0.5862(3) 0.9614(3) 0.5551(3) 0.0635(9) Uani 1 1 d . . . 
C8 C 0.7889(3) 0.9474(3) 0.6764(3) 0.0417(9) Uani 1 1 d . . . 
C10 C 0.6790(3) 0.7605(3) 0.5184(3) 0.0382(9) Uani 1 1 d . . . 
O1 O 0.4025(3) 0.9253(3) 0.5469(3) 0.0745(10) Uani 1 1 d . . . 
C16 C 0.8084(3) 1.0376(3) 0.7877(4) 0.0503(11) Uani 1 1 d . . . 
C14 C 0.8822(3) 0.9648(4) 0.6367(4) 0.0544(11) Uani 1 1 d . . . 
H14 H 0.9500 1.0337 0.6759 0.065 Uiso 1 1 calc R . . 
C20 C 0.5695(3) 0.7699(3) 0.7124(3) 0.0376(9) Uani 1 1 d . . . 
C12 C 0.7741(3) 0.7778(4) 0.4812(3) 0.0509(11) Uani 1 1 d . . . 
H12 H 0.7701 0.7198 0.4167 0.061 Uiso 1 1 calc R . . 
C17 C 0.6582(4) 0.7254(3) 0.7259(3) 0.0425(10) Uani 1 1 d . . . 
C47 C 0.4770(3) 0.7516(3) 0.7518(3) 0.0480(10) Uani 1 1 d . . . 
H47 H 0.4688 0.7115 0.7872 0.058 Uiso 1 1 calc R . . 
C15 C 0.5701(4) 0.6517(3) 0.4515(3) 0.0439(10) Uani 1 1 d . . . 
C13 C 0.8746(4) 0.8800(4) 0.5389(4) 0.0592(12) Uani 1 1 d . . . 
H13 H 0.9370 0.8919 0.5124 0.071 Uiso 1 1 calc R . . 
C49 C 0.4058(3) 0.8471(3) 0.6832(3) 0.0460(10) Uani 1 1 d . . . 
H49 H 0.3501 0.8726 0.6732 0.055 Uiso 1 1 calc R . . 
C18 C 0.4989(3) 0.9212(3) 0.5770(3) 0.0447(10) Uani 1 1 d . . . 
C48 C 0.3967(4) 0.7925(3) 0.7388(3) 0.0528(11) Uani 1 1 d . . . 
H48 H 0.3364 0.7828 0.7680 0.063 Uiso 1 1 calc R . . 
O8 O 0.2153(2) 1.1915(2) 0.7235(2) 0.0510(7) Uani 1 1 d . . . 
O11 O 0.1794(3) 0.9867(2) 0.6691(2) 0.0596(8) Uani 1 1 d . . . 
C38 C 0.2022(3) 1.0764(3) 0.8552(3) 0.0417(10) Uani 1 1 d . . . 
O14 O 0.5316(2) 1.3692(2) 1.0680(3) 0.0657(9) Uani 1 1 d . . . 
C4 C 0.4039(3) 1.1767(3) 0.8534(3) 0.0365(9) Uani 1 1 d . . . 
O7 O 0.3565(2) 1.3684(2) 0.7955(2) 0.0525(7) Uani 1 1 d . . . 
O13 O 0.4287(3) 1.4701(2) 1.1049(3) 0.0669(9) Uani 1 1 d . . . 
O10 O 0.4041(3) 1.0432(3) 0.9555(3) 0.0667(9) Uani 1 1 d . . . 
C3 C 0.4902(3) 1.1400(3) 0.8698(3) 0.0425(10) Uani 1 1 d . . . 
C36 C 0.3238(3) 1.2682(3) 0.9998(3) 0.0380(9) Uani 1 1 d . . . 
C37 C 0.3096(3) 1.1726(3) 0.9050(3) 0.0374(9) Uani 1 1 d . . . 
C35 C 0.2317(3) 1.2652(4) 1.0412(3) 0.0497(11) Uani 1 1 d . . . 
H35 H 0.2412 1.3300 1.1030 0.060 Uiso 1 1 calc R . . 
O12 O 0.1527(3) 0.8786(2) 0.7405(3) 0.0731(10) Uani 1 1 d . . . 
C45 C 0.4383(4) 1.3732(3) 1.0596(3) 0.0415(10) Uani 1 1 d . . . 
C39 C 0.1128(3) 1.0734(4) 0.9001(3) 0.0512(11) Uani 1 1 d . . . 
H39 H 0.0428 1.0069 0.8675 0.061 Uiso 1 1 calc R . . 
C5 C 0.4121(3) 1.2255(3) 0.7892(3) 0.0400(9) Uani 1 1 d . . . 
C46 C 0.3213(4) 1.2649(3) 0.7685(3) 0.0440(10) Uani 1 1 d . . . 
O9 O 0.5887(3) 1.0846(3) 0.9640(3) 0.0824(11) Uani 1 1 d . . . 
C2 C 0.5768(3) 1.1512(3) 0.8217(3) 0.0514(11) Uani 1 1 d . . . 
H2 H 0.6321 1.1251 0.8314 0.062 Uiso 1 1 calc R . . 
N1 N 0.7784(3) 0.5530(4) 0.5949(3) 0.0627(10) Uani 1 1 d . . . 
H1N H 0.7236 0.5656 0.6190 0.081(17) Uiso 1 1 calc R . . 
C7 C 0.4919(3) 1.0859(3) 0.9340(3) 0.0468(10) Uani 1 1 d . . . 
C6 C 0.4998(4) 1.2375(3) 0.7440(3) 0.0544(11) Uani 1 1 d . . . 
H6 H 0.5036 1.2708 0.7026 0.065 Uiso 1 1 calc R . . 
C33 C 0.1273(4) 1.1687(4) 0.9929(3) 0.0550(11) Uani 1 1 d . . . 
H33 H 0.0670 1.1674 1.0223 0.066 Uiso 1 1 calc R . . 
C41 C 0.9684(4) 0.6218(4) 0.5878(4) 0.0650(13) Uani 1 1 d . . . 
H41 H 1.0397 0.6838 0.6093 0.078 Uiso 1 1 calc R . . 
C42 C 0.9525(3) 0.5120(3) 0.5197(3) 0.0440(10) Uani 1 1 d . . . 
C44 C 0.7598(4) 0.4470(4) 0.5298(4) 0.0799(16) Uani 1 1 d . . . 
H44 H 0.6877 0.3868 0.5104 0.096 Uiso 1 1 calc R . . 
C43 C 0.8447(4) 0.4238(4) 0.4902(4) 0.0746(15) Uani 1 1 d . . . 
H43 H 0.8297 0.3482 0.4431 0.090 Uiso 1 1 calc R . . 
C1 C 0.5825(4) 1.1996(4) 0.7607(4) 0.0599(13) Uani 1 1 d . . . 
H1 H 0.6419 1.2072 0.7302 0.072 Uiso 1 1 calc R . . 
C52 C 0.8791(5) 0.6404(4) 0.6243(4) 0.0739(15) Uani 1 1 d . . . 
H52 H 0.8900 0.7149 0.6698 0.089 Uiso 1 1 calc R . . 
C26 C 0.0466(4) 0.3886(4) 0.9180(4) 0.0638(13) Uani 1 1 d . . . 
H26 H -0.0188 0.3222 0.8990 0.077 Uiso 1 1 calc R . . 
N2 N 0.2321(3) 0.4746(4) 0.9099(3) 0.0635(11) Uani 1 1 d . . . 
H2N H 0.292(5) 0.463(4) 0.888(4) 0.094 Uiso 1 1 d . . . 
C21 C 0.0503(3) 0.4942(3) 0.9816(3) 0.0469(10) Uani 1 1 d . . . 
C25 C 0.1386(4) 0.3806(4) 0.8823(4) 0.0688(14) Uani 1 1 d . . . 
H25 H 0.1353 0.3087 0.8386 0.083 Uiso 1 1 calc R . . 
C22 C 0.2386(4) 0.5773(4) 0.9705(4) 0.0836(17) Uani 1 1 d . . . 
H22 H 0.3049 0.6420 0.9875 0.100 Uiso 1 1 calc R . . 
C23 C 0.1503(4) 0.5903(4) 1.0085(4) 0.0760(16) Uani 1 1 d . . . 
H23 H 0.1568 0.6635 1.0524 0.091 Uiso 1 1 calc R . . 
C27 C -0.1578(4) 0.3541(4) 0.6944(4) 0.133(3) Uani 1 1 d G . . 
H27 H -0.2270 0.2887 0.6700 0.159 Uiso 1 1 calc R . . 
C28 C -0.1506(4) 0.4623(5) 0.7608(4) 0.139(3) Uani 1 1 d G . . 
H28 H -0.2150 0.4692 0.7809 0.166 Uiso 1 1 calc R . . 
C29 C -0.0472(5) 0.5600(3) 0.7973(3) 0.137(3) Uani 1 1 d G . . 
H29 H -0.0424 0.6324 0.8418 0.164 Uiso 1 1 calc R . . 
C30 C 0.0490(3) 0.5497(3) 0.7673(3) 0.097(2) Uani 1 1 d G . . 
C31 C 0.0419(4) 0.4415(4) 0.7009(3) 0.142(3) Uani 1 1 d G . . 
H31 H 0.1063 0.4346 0.6808 0.170 Uiso 1 1 calc R . . 
C32 C -0.0615(5) 0.3437(3) 0.6644(3) 0.0931(19) Uani 1 1 d G . . 
 
loop_ 
 _atom_site_aniso_label 
 _atom_site_aniso_U_11 
 _atom_site_aniso_U_22 
 _atom_site_aniso_U_33 
 _atom_site_aniso_U_23 
 _atom_site_aniso_U_13 
 _atom_site_aniso_U_12 
C51 0.033(2) 0.033(2) 0.063(3) 0.016(2) 0.013(2) 0.0085(18) 
O1P 0.115(4) 0.116(4) 0.141(4) 0.070(3) 0.054(3) 0.042(3) 
C54 0.306(14) 0.085(6) 0.142(8) 0.032(5) 0.035(8) 0.053(7) 
O4 0.0418(17) 0.0421(15) 0.0552(18) 0.0197(14) 0.0056(14) 0.0164(14) 
O3 0.0535(17) 0.0358(16) 0.066(2) 0.0212(15) 0.0175(15) 0.0216(14) 
O15 0.0444(18) 0.0525(18) 0.073(2) 0.0162(16) 0.0103(16) 0.0238(15) 
O16 0.0545(18) 0.0461(17) 0.077(2) 0.0210(16) 0.0164(16) 0.0276(15) 
C9 0.033(2) 0.038(2) 0.047(2) 0.0246(19) 0.0141(19) 0.0185(18) 
O6 0.062(2) 0.0328(17) 0.095(3) 0.0178(16) 0.0269(18) 0.0168(15) 
C19 0.034(2) 0.0232(17) 0.039(2) 0.0109(17) 0.0120(17) 0.0119(16) 
O5 0.064(2) 0.0455(17) 0.0488(18) 0.0129(15) 0.0164(16) 0.0189(15) 
C50 0.032(2) 0.032(2) 0.050(2) 0.0168(19) 0.0132(19) 0.0152(17) 
O2 0.0543(19) 0.079(2) 0.095(3) 0.064(2) 0.0354(18) 0.0406(17) 
C8 0.037(2) 0.038(2) 0.050(3) 0.022(2) 0.0147(19) 0.0175(18) 
C10 0.037(2) 0.039(2) 0.039(2) 0.0196(19) 0.0127(18) 0.0186(18) 
O1 0.0509(19) 0.091(2) 0.107(3) 0.068(2) 0.0227(19) 0.0370(18) 
C16 0.030(2) 0.034(2) 0.068(3) 0.014(2) 0.015(2) 0.0122(18) 
C14 0.036(2) 0.049(2) 0.066(3) 0.024(2) 0.017(2) 0.011(2) 
C20 0.040(2) 0.0293(19) 0.036(2) 0.0113(17) 0.0120(18) 0.0157(17) 
C12 0.048(3) 0.055(3) 0.047(3) 0.023(2) 0.022(2) 0.024(2) 
C17 0.052(3) 0.040(2) 0.036(2) 0.0177(19) 0.016(2) 0.023(2) 
C47 0.053(3) 0.043(2) 0.051(3) 0.025(2) 0.022(2) 0.021(2) 
C15 0.044(3) 0.047(2) 0.041(2) 0.020(2) 0.016(2) 0.024(2) 
C13 0.044(3) 0.072(3) 0.065(3) 0.034(3) 0.030(2) 0.025(2) 
C49 0.036(2) 0.040(2) 0.058(3) 0.019(2) 0.017(2) 0.0217(18) 
C18 0.035(2) 0.041(2) 0.055(3) 0.021(2) 0.012(2) 0.0208(19) 
C48 0.046(3) 0.052(2) 0.064(3) 0.027(2) 0.031(2) 0.024(2) 
O8 0.0456(17) 0.0445(16) 0.0531(18) 0.0210(14) 0.0121(14) 0.0166(14) 
O11 0.064(2) 0.0461(17) 0.0506(19) 0.0165(15) 0.0180(16) 0.0174(15) 
C38 0.035(2) 0.038(2) 0.048(2) 0.0194(19) 0.0136(19) 0.0137(18) 
O14 0.0385(17) 0.0466(17) 0.082(2) 0.0127(16) 0.0154(16) 0.0172(14) 
C4 0.032(2) 0.0268(18) 0.040(2) 0.0091(17) 0.0136(18) 0.0118(16) 
O7 0.0581(18) 0.0365(16) 0.0621(19) 0.0228(14) 0.0165(15) 0.0245(14) 
O13 0.0567(19) 0.0432(17) 0.089(2) 0.0209(17) 0.0208(17) 0.0290(15) 
O10 0.0531(19) 0.084(2) 0.095(3) 0.063(2) 0.0312(18) 0.0391(17) 
C3 0.037(2) 0.031(2) 0.051(3) 0.0154(19) 0.015(2) 0.0136(17) 
C36 0.035(2) 0.038(2) 0.043(2) 0.0203(19) 0.0136(18) 0.0192(18) 
C37 0.036(2) 0.031(2) 0.044(2) 0.0176(19) 0.0112(18) 0.0156(17) 
C35 0.049(3) 0.054(3) 0.046(3) 0.019(2) 0.021(2) 0.030(2) 
O12 0.081(2) 0.0345(17) 0.078(2) 0.0194(16) 0.0213(19) 0.0130(16) 
C45 0.046(2) 0.040(2) 0.035(2) 0.0145(19) 0.0166(19) 0.0199(19) 
C39 0.037(2) 0.048(2) 0.059(3) 0.025(2) 0.014(2) 0.0133(19) 
C5 0.039(2) 0.0315(19) 0.042(2) 0.0126(18) 0.0144(19) 0.0152(17) 
C46 0.056(3) 0.040(2) 0.036(2) 0.0165(19) 0.020(2) 0.024(2) 
O9 0.0468(19) 0.103(3) 0.127(3) 0.079(3) 0.027(2) 0.0373(19) 
C2 0.044(2) 0.041(2) 0.064(3) 0.018(2) 0.023(2) 0.024(2) 
N1 0.051(2) 0.077(3) 0.068(3) 0.034(2) 0.025(2) 0.038(2) 
C7 0.035(2) 0.040(2) 0.059(3) 0.020(2) 0.013(2) 0.0179(19) 
C6 0.062(3) 0.050(2) 0.059(3) 0.029(2) 0.033(2) 0.027(2) 
C33 0.044(3) 0.062(3) 0.059(3) 0.028(2) 0.027(2) 0.025(2) 
C41 0.058(3) 0.043(3) 0.075(3) 0.017(2) 0.023(3) 0.019(2) 
C42 0.035(2) 0.041(2) 0.047(2) 0.018(2) 0.0088(19) 0.0156(19) 
C44 0.044(3) 0.067(3) 0.093(4) 0.020(3) 0.028(3) 0.015(2) 
C43 0.043(3) 0.053(3) 0.087(4) 0.011(3) 0.024(3) 0.011(2) 
C1 0.056(3) 0.055(3) 0.075(3) 0.031(3) 0.043(3) 0.026(2) 
C52 0.070(3) 0.056(3) 0.088(4) 0.023(3) 0.034(3) 0.037(3) 
C26 0.054(3) 0.046(3) 0.085(4) 0.026(3) 0.031(3) 0.024(2) 
N2 0.051(2) 0.077(3) 0.066(3) 0.033(2) 0.027(2) 0.034(2) 
C21 0.039(2) 0.042(2) 0.049(3) 0.017(2) 0.0124(19) 0.0162(19) 
C25 0.068(3) 0.063(3) 0.083(4) 0.032(3) 0.035(3) 0.041(3) 
C22 0.047(3) 0.063(3) 0.100(4) 0.016(3) 0.034(3) 0.013(2) 
C23 0.043(3) 0.049(3) 0.087(4) 0.005(3) 0.025(3) 0.008(2) 
C27 0.138(7) 0.144(8) 0.138(7) 0.091(7) 0.049(6) 0.059(6) 
C28 0.166(8) 0.112(6) 0.124(6) 0.073(5) 0.040(6) 0.031(6) 
C29 0.075(4) 0.236(9) 0.173(7) 0.177(8) 0.054(5) 0.045(6) 
C30 0.155(6) 0.034(3) 0.060(4) 0.025(3) -0.009(4) 0.011(3) 
C31 0.235(10) 0.099(5) 0.077(5) 0.050(4) -0.004(5) 0.071(6) 
C32 0.131(6) 0.051(3) 0.067(4) 0.019(3) 0.014(4) 0.030(4) 
 
_geom_special_details 
; 
 All esds (except the esd in the dihedral angle between two l.s. planes) 
 are estimated using the full covariance matrix.  The cell esds are taken 
 into account individually in the estimation of esds in distances, angles 
 and torsion angles; correlations between esds in cell parameters are only 
 used when they are defined by crystal symmetry.  An approximate (isotropic) 
 treatment of cell esds is used for estimating esds involving l.s. planes. 
; 
 
loop_ 
 _geom_bond_atom_site_label_1 
 _geom_bond_atom_site_label_2 
 _geom_bond_distance 
 _geom_bond_site_symmetry_2 
 _geom_bond_publ_flag 
C51 O12 1.214(5) . ? 
C51 O11 1.306(5) . ? 
C51 C38 1.510(5) . ? 
O1P C30 1.324(5) . ? 
C54 C32 1.467(8) . ? 
O4 C17 1.257(5) . ? 
O3 C17 1.257(4) . ? 
O15 C15 1.203(4) . ? 
O16 C15 1.314(4) . ? 
C9 C8 1.396(5) . ? 
C9 C10 1.402(5) . ? 
C9 C19 1.508(5) . ? 
O6 C16 1.212(5) . ? 
C19 C50 1.397(5) . ? 
C19 C20 1.400(5) . ? 
O5 C16 1.321(5) . ? 
C50 C49 1.397(5) . ? 
C50 C18 1.491(6) . ? 
O2 C18 1.229(5) . ? 
C8 C14 1.391(5) . ? 
C8 C16 1.502(6) . ? 
C10 C12 1.389(5) . ? 
C10 C15 1.485(5) . ? 
O1 C18 1.289(4) . ? 
C14 C13 1.384(6) . ? 
C20 C47 1.381(5) . ? 
C20 C17 1.512(5) . ? 
C12 C13 1.379(6) . ? 
C47 C48 1.377(6) . ? 
C49 C48 1.362(6) . ? 
O8 C46 1.263(5) . ? 
C38 C37 1.388(5) . ? 
C38 C39 1.390(5) . ? 
O14 C45 1.209(4) . ? 
C4 C5 1.409(5) . ? 
C4 C3 1.414(5) . ? 
C4 C37 1.502(5) . ? 
O7 C46 1.253(4) . ? 
O13 C45 1.313(4) . ? 
O10 C7 1.241(5) . ? 
C3 C2 1.392(5) . ? 
C3 C7 1.478(6) . ? 
C36 C35 1.389(5) . ? 
C36 C37 1.399(5) . ? 
C36 C45 1.494(5) . ? 
C35 C33 1.367(6) . ? 
C39 C33 1.380(6) . ? 
C5 C6 1.375(5) . ? 
C5 C46 1.509(5) . ? 
O9 C7 1.273(5) . ? 
C2 C1 1.362(6) . ? 
N1 C52 1.314(6) . ? 
N1 C44 1.310(6) . ? 
C6 C1 1.387(6) . ? 
C41 C42 1.372(5) . ? 
C41 C52 1.376(6) . ? 
C42 C43 1.378(6) . ? 
C42 C42 1.487(7) 2_766 ? 
C44 C43 1.363(6) . ? 
C26 C25 1.364(6) . ? 
C26 C21 1.371(6) . ? 
N2 C22 1.314(6) . ? 
N2 C25 1.320(6) . ? 
C21 C23 1.384(6) . ? 
C21 C21 1.488(7) 2_567 ? 
C22 C23 1.352(6) . ? 
C27 C28 1.3900 . ? 
C27 C32 1.3900 . ? 
C28 C29 1.3900 . ? 
C29 C30 1.3900 . ? 
C30 C31 1.3900 . ? 
C31 C32 1.3900 . ? 
 
loop_ 
 _geom_angle_atom_site_label_1 
 _geom_angle_atom_site_label_2 
 _geom_angle_atom_site_label_3 
 _geom_angle 
 _geom_angle_site_symmetry_1 
 _geom_angle_site_symmetry_3 
 _geom_angle_publ_flag 
O12 C51 O11 122.3(4) . . ? 
O12 C51 C38 121.2(4) . . ? 
O11 C51 C38 116.5(3) . . ? 
C8 C9 C10 118.5(3) . . ? 
C8 C9 C19 120.5(3) . . ? 
C10 C9 C19 120.8(3) . . ? 
C50 C19 C20 118.7(3) . . ? 
C50 C19 C9 122.5(3) . . ? 
C20 C19 C9 118.8(3) . . ? 
C19 C50 C49 119.3(4) . . ? 
C19 C50 C18 122.5(3) . . ? 
C49 C50 C18 118.2(3) . . ? 
C14 C8 C9 120.5(4) . . ? 
C14 C8 C16 117.2(3) . . ? 
C9 C8 C16 122.3(3) . . ? 
C12 C10 C9 120.2(3) . . ? 
C12 C10 C15 119.1(3) . . ? 
C9 C10 C15 120.6(3) . . ? 
O6 C16 O5 121.3(4) . . ? 
O6 C16 C8 122.2(4) . . ? 
O5 C16 C8 116.5(3) . . ? 
C13 C14 C8 120.3(4) . . ? 
C47 C20 C19 120.5(4) . . ? 
C47 C20 C17 120.8(3) . . ? 
C19 C20 C17 118.7(3) . . ? 
C13 C12 C10 120.7(4) . . ? 
O3 C17 O4 123.5(4) . . ? 
O3 C17 C20 118.1(4) . . ? 
O4 C17 C20 118.4(3) . . ? 
C48 C47 C20 120.3(4) . . ? 
O15 C15 O16 122.6(4) . . ? 
O15 C15 C10 123.4(4) . . ? 
O16 C15 C10 114.1(3) . . ? 
C12 C13 C14 119.6(4) . . ? 
C48 C49 C50 121.2(4) . . ? 
O2 C18 O1 122.2(4) . . ? 
O2 C18 C50 122.4(4) . . ? 
O1 C18 C50 115.3(4) . . ? 
C49 C48 C47 119.9(4) . . ? 
C37 C38 C39 120.9(4) . . ? 
C37 C38 C51 121.9(3) . . ? 
C39 C38 C51 117.2(3) . . ? 
C5 C4 C3 117.1(3) . . ? 
C5 C4 C37 118.9(3) . . ? 
C3 C4 C37 123.9(3) . . ? 
C2 C3 C4 119.7(4) . . ? 
C2 C3 C7 117.1(4) . . ? 
C4 C3 C7 123.2(3) . . ? 
C35 C36 C37 120.0(3) . . ? 
C35 C36 C45 119.0(3) . . ? 
C37 C36 C45 120.9(3) . . ? 
C38 C37 C36 118.1(3) . . ? 
C38 C37 C4 120.5(3) . . ? 
C36 C37 C4 121.3(3) . . ? 
C33 C35 C36 121.3(4) . . ? 
O14 C45 O13 122.8(4) . . ? 
O14 C45 C36 123.0(3) . . ? 
O13 C45 C36 114.2(3) . . ? 
C33 C39 C38 120.4(4) . . ? 
C6 C5 C4 122.1(4) . . ? 
C6 C5 C46 118.9(4) . . ? 
C4 C5 C46 119.1(3) . . ? 
O7 C46 O8 124.2(4) . . ? 
O7 C46 C5 117.6(4) . . ? 
O8 C46 C5 118.2(3) . . ? 
C1 C2 C3 121.5(4) . . ? 
C52 N1 C44 121.4(4) . . ? 
O10 C7 O9 122.6(4) . . ? 
O10 C7 C3 122.0(4) . . ? 
O9 C7 C3 115.4(4) . . ? 
C1 C6 C5 119.5(4) . . ? 
C35 C33 C39 119.1(4) . . ? 
C42 C41 C52 120.3(4) . . ? 
C41 C42 C43 117.2(4) . . ? 
C41 C42 C42 122.0(4) . 2_766 ? 
C43 C42 C42 120.8(4) . 2_766 ? 
N1 C44 C43 120.9(4) . . ? 
C44 C43 C42 120.1(4) . . ? 
C2 C1 C6 120.1(4) . . ? 
N1 C52 C41 120.2(4) . . ? 
C25 C26 C21 120.3(4) . . ? 
C22 N2 C25 121.3(4) . . ? 
C26 C21 C23 117.5(4) . . ? 
C26 C21 C21 121.5(4) . 2_567 ? 
C23 C21 C21 121.0(4) . 2_567 ? 
N2 C25 C26 120.1(4) . . ? 
N2 C22 C23 121.1(5) . . ? 
C22 C23 C21 119.7(4) . . ? 
C28 C27 C32 120.0 . . ? 
C29 C28 C27 120.0 . . ? 
C28 C29 C30 120.0 . . ? 
O1P C30 C31 117.7(4) . . ? 
O1P C30 C29 122.3(4) . . ? 
C31 C30 C29 120.0 . . ? 
C32 C31 C30 120.0 . . ? 
C31 C32 C27 120.0 . . ? 
C31 C32 C54 127.1(6) . . ? 
C27 C32 C54 112.8(6) . . ? 
 
_diffrn_measured_fraction_theta_max    0.988 
_diffrn_reflns_theta_full              24.03 
_diffrn_measured_fraction_theta_full   0.988 
_refine_diff_density_max    0.699 
_refine_diff_density_min   -0.478 
_refine_diff_density_rms    0.054 
 
data_10
 
_audit_creation_method            SHELXL-97 
_chemical_name_systematic 
; 
 ? 
; 
_chemical_name_common             ? 
_chemical_melting_point           ? 
_chemical_formula_moiety          ? 
_chemical_formula_sum 
 'C49 H38 N2 O18' 
_chemical_formula_weight          942.81 
 
loop_ 
 _atom_type_symbol 
 _atom_type_description 
 _atom_type_scat_dispersion_real 
 _atom_type_scat_dispersion_imag 
 _atom_type_scat_source 
 'C'  'C'   0.0033   0.0016 
 'International Tables Vol C Tables 4.2.6.8 and 6.1.1.4' 
 'H'  'H'   0.0000   0.0000 
 'International Tables Vol C Tables 4.2.6.8 and 6.1.1.4' 
 'N'  'N'   0.0061   0.0033 
 'International Tables Vol C Tables 4.2.6.8 and 6.1.1.4' 
 'O'  'O'   0.0106   0.0060 
 'International Tables Vol C Tables 4.2.6.8 and 6.1.1.4' 
 
_symmetry_cell_setting             Triclinic
_symmetry_space_group_name_H-M    P-1
 
loop_ 
 _symmetry_equiv_pos_as_xyz 
 'x, y, z' 
 '-x, -y, -z' 
 
_cell_length_a                    12.872(3) 
_cell_length_b                    14.222(4) 
_cell_length_c                    14.895(6) 
_cell_angle_alpha                 115.035(10) 
_cell_angle_beta                  96.909(10) 
_cell_angle_gamma                 110.169(7) 
_cell_volume                      2202.6(12) 
_cell_formula_units_Z             2 
_cell_measurement_temperature     293(2) 
_cell_measurement_reflns_used    8958  
_cell_measurement_theta_min      1.59  
_cell_measurement_theta_max      26.69  
 
_exptl_crystal_description       needle 
_exptl_crystal_colour            'deep orange'  
_exptl_crystal_size_max           0.25
_exptl_crystal_size_mid           0.17
_exptl_crystal_size_min           0.13
_exptl_crystal_density_meas       'not measured'
_exptl_crystal_density_diffrn     1.422
_exptl_crystal_density_method     'not measured' 
_exptl_crystal_F_000              980
_exptl_absorpt_coefficient_mu     0.098 
_exptl_absorpt_correction_type    empirical
_exptl_absorpt_correction_T_min   0.980 
_exptl_absorpt_correction_T_max   0.987 
_exptl_absorpt_process_details    sadabs
 
_exptl_special_details 
; 
 ? 
; 
 
_diffrn_ambient_temperature       293(2) 
_diffrn_radiation_wavelength      0.71073 
_diffrn_radiation_type            MoK\a 
_diffrn_radiation_source          'fine-focus sealed tube' 
_diffrn_radiation_monochromator   graphite 
_diffrn_measurement_device_type   'Bruker CCD APEX 2'
_diffrn_measurement_method        'hemisphere'
_diffrn_detector_area_resol_mean  ? 
_diffrn_standards_number          ? 
_diffrn_standards_interval_count  ? 
_diffrn_standards_interval_time   ? 
_diffrn_standards_decay_%         ? 
_diffrn_reflns_number             28067 
_diffrn_reflns_av_R_equivalents   0.0544 
_diffrn_reflns_av_sigmaI/netI     0.0663 
_diffrn_reflns_limit_h_min        -16 
_diffrn_reflns_limit_h_max        15 
_diffrn_reflns_limit_k_min        -17 
_diffrn_reflns_limit_k_max        17 
_diffrn_reflns_limit_l_min        -18 
_diffrn_reflns_limit_l_max        18 
_diffrn_reflns_theta_min          1.59 
_diffrn_reflns_theta_max          26.69 
_reflns_number_total              8958 
_reflns_number_gt                 4735 
_reflns_threshold_expression      >2sigma(I) 
 
_computing_data_collection        ? 
_computing_cell_refinement        ? 
_computing_data_reduction         ? 
_computing_structure_solution     'SHELXS-97 (Sheldrick, 1990)' 
_computing_structure_refinement   'SHELXL-97 (Sheldrick, 1997)' 
_computing_molecular_graphics     ? 
_computing_publication_material   ? 
 
_refine_special_details 
; 
 Refinement of F^2^ against ALL reflections.  The weighted R-factor wR and 
 goodness of fit S are based on F^2^, conventional R-factors R are based 
 on F, with F set to zero for negative F^2^. The threshold expression of 
 F^2^ > 2sigma(F^2^) is used only for calculating R-factors(gt) etc. and is 
 not relevant to the choice of reflections for refinement.  R-factors based 
 on F^2^ are statistically about twice as large as those based on F, and R- 
 factors based on ALL data will be even larger. 
# SQUEEZE RESULTS (APPEND TO CIF)
# Note: Data are Listed for all Voids in the P1 Unit Cell
# i.e. Centre of Gravity, Solvent Accessible Volume,
# Recovered number of Electrons in the Void and
# Details about the Squeezed Material
loop_
  _platon_squeeze_void_nr
  _platon_squeeze_void_average_x
  _platon_squeeze_void_average_y
  _platon_squeeze_void_average_z
  _platon_squeeze_void_volume
  _platon_squeeze_void_count_electrons
  _platon_squeeze_void_content
   1  0.490  0.469  0.735       233        66 ' '
   2  0.510  0.531  0.265       233        66 ' '
_platon_squeeze_details
; 
 
_refine_ls_structure_factor_coef  Fsqd  
_refine_ls_matrix_type            full 
_refine_ls_weighting_scheme       calc  
_refine_ls_weighting_details 
 'calc w=1/[\s^2^(Fo^2^)+(0.1000P)^2^+0.0000P] where P=(Fo^2^+2Fc^2^)/3' 
_atom_sites_solution_primary      direct 
_atom_sites_solution_secondary    difmap 
_atom_sites_solution_hydrogens    geom 
_refine_ls_hydrogen_treatment     constr 
_refine_ls_extinction_method      none 
_refine_ls_extinction_coef        ? 
_refine_ls_number_reflns          8958 
_refine_ls_number_parameters      541 
_refine_ls_number_restraints      0 
_refine_ls_R_factor_all           0.1194 
_refine_ls_R_factor_gt            0.0697 
_refine_ls_wR_factor_ref          0.1951 
_refine_ls_wR_factor_gt           0.1747 
_refine_ls_goodness_of_fit_ref    0.985 
_refine_ls_restrained_S_all       0.985 
_refine_ls_shift/su_max           0.000 
_refine_ls_shift/su_mean          0.000 
 
loop_ 
 _atom_site_label 
 _atom_site_type_symbol 
 _atom_site_fract_x 
 _atom_site_fract_y 
 _atom_site_fract_z 
 _atom_site_U_iso_or_equiv 
 _atom_site_adp_type 
 _atom_site_occupancy 
 _atom_site_symmetry_multiplicity 
 _atom_site_calc_flag 
 _atom_site_refinement_flags 
 _atom_site_disorder_assembly 
 _atom_site_disorder_group 
O11 O 1.09471(18) -0.0422(2) 0.04523(19) 0.0712(6) Uani 1 1 d . . . 
O12 O 0.91277(19) -0.0794(2) 0.0435(2) 0.0878(8) Uani 1 1 d . . . 
O13 O 1.28536(16) -0.19466(16) 0.27509(14) 0.0527(5) Uani 1 1 d . . . 
O14 O 1.14527(16) -0.37280(16) 0.20290(15) 0.0547(5) Uani 1 1 d . . . 
C11 C 1.0959(2) -0.17725(19) 0.14872(18) 0.0366(6) Uani 1 1 d . . . 
C12 C 1.0116(2) -0.1388(2) 0.1341(2) 0.0418(6) Uani 1 1 d . . . 
C13 C 0.9249(2) -0.1530(2) 0.1825(2) 0.0523(7) Uani 1 1 d . . . 
H13 H 0.8688 -0.1279 0.1726 0.063 Uiso 1 1 calc R . . 
C14 C 0.9207(3) -0.2026(3) 0.2438(2) 0.0585(8) Uani 1 1 d . . . 
H14 H 0.8633 -0.2098 0.2761 0.070 Uiso 1 1 calc R . . 
C15 C 1.0021(2) -0.2422(2) 0.2574(2) 0.0524(7) Uani 1 1 d . . . 
H15 H 0.9980 -0.2785 0.2971 0.063 Uiso 1 1 calc R . . 
C16 C 1.0904(2) -0.2275(2) 0.21164(19) 0.0400(6) Uani 1 1 d . . . 
C17 C 1.0083(2) -0.0844(2) 0.0697(2) 0.0486(7) Uani 1 1 d . . . 
C18 C 1.1805(2) -0.2679(2) 0.23154(19) 0.0414(6) Uani 1 1 d . . . 
O23 O 1.32072(18) 0.01251(16) 0.32796(15) 0.0615(6) Uani 1 1 d . . . 
O22 O 0.97020(17) -0.36511(17) -0.06055(17) 0.0681(6) Uani 1 1 d . . . 
O21 O 1.07040(18) -0.46726(16) -0.10274(18) 0.0702(6) Uani 1 1 d . . . 
O24 O 1.3442(2) 0.12410(17) 0.25707(18) 0.0769(7) Uani 1 1 d . . . 
C21 C 1.1908(2) -0.1705(2) 0.09764(19) 0.0375(6) Uani 1 1 d . . . 
C22 C 1.1760(2) -0.2650(2) 0.00407(19) 0.0379(6) Uani 1 1 d . . . 
C23 C 1.2688(2) -0.2608(2) -0.0371(2) 0.0486(7) Uani 1 1 d . . . 
H23 H 1.2598 -0.3251 -0.0974 0.058 Uiso 1 1 calc R . . 
C24 C 1.3726(2) -0.1629(3) 0.0104(2) 0.0581(8) Uani 1 1 d . . . 
H24 H 1.4330 -0.1603 -0.0185 0.070 Uiso 1 1 calc R . . 
C25 C 1.3869(2) -0.0689(3) 0.1008(2) 0.0534(7) Uani 1 1 d . . . 
H25 H 1.4568 -0.0020 0.1323 0.064 Uiso 1 1 calc R . . 
C26 C 1.2975(2) -0.0728(2) 0.1459(2) 0.0437(6) Uani 1 1 d . . . 
C27 C 1.0634(2) -0.3695(2) -0.05408(19) 0.0423(6) Uani 1 1 d . . . 
C28 C 1.3216(2) 0.0292(2) 0.2483(2) 0.0517(7) Uani 1 1 d . . . 
O31 O 1.02409(17) 0.34704(17) 0.55862(16) 0.0631(6) Uani 1 1 d . . . 
O32 O 0.91231(17) 0.43898(17) 0.58526(17) 0.0648(6) Uani 1 1 d . . . 
O33 O 0.70001(17) -0.00127(17) 0.14361(15) 0.0622(6) Uani 1 1 d . . . 
O34 O 0.66948(19) -0.13620(17) 0.18738(19) 0.0759(7) Uani 1 1 d . . . 
C31 C 0.8145(2) 0.1523(2) 0.38139(19) 0.0373(6) Uani 1 1 d . . . 
C32 C 0.8195(2) 0.2362(2) 0.47723(19) 0.0394(6) Uani 1 1 d . . . 
C33 C 0.7235(2) 0.2169(3) 0.5131(2) 0.0535(7) Uani 1 1 d . . . 
H33 H 0.7268 0.2735 0.5765 0.064 Uiso 1 1 calc R . . 
C34 C 0.6241(3) 0.1151(3) 0.4555(3) 0.0665(9) Uani 1 1 d . . . 
H34 H 0.5614 0.1018 0.4812 0.080 Uiso 1 1 calc R . . 
C35 C 0.6165(2) 0.0326(3) 0.3599(2) 0.0578(8) Uani 1 1 d . . . 
H35 H 0.5484 -0.0360 0.3211 0.069 Uiso 1 1 calc R . . 
C36 C 0.7101(2) 0.0510(2) 0.3208(2) 0.0444(6) Uani 1 1 d . . . 
C37 C 0.9287(2) 0.3449(2) 0.5433(2) 0.0430(6) Uani 1 1 d . . . 
C38 C 0.6928(2) -0.0367(2) 0.2132(2) 0.0503(7) Uani 1 1 d . . . 
O41 O 0.73663(17) 0.20766(16) 0.22555(15) 0.0533(5) Uani 1 1 d . . . 
O42 O 0.87758(16) 0.38611(16) 0.31474(15) 0.0549(5) Uani 1 1 d . . . 
O43 O 0.91249(18) 0.03609(19) 0.44247(18) 0.0662(6) Uani 1 1 d . . . 
O44 O 1.09617(18) 0.0740(2) 0.4504(2) 0.0792(7) Uani 1 1 d . . . 
C41 C 0.9167(2) 0.17224(19) 0.34043(18) 0.0359(6) Uani 1 1 d . . . 
C42 C 0.9295(2) 0.2333(2) 0.28636(19) 0.0390(6) Uani 1 1 d . . . 
C43 C 1.0219(2) 0.2542(2) 0.2468(2) 0.0518(7) Uani 1 1 d . . . 
H43 H 1.0306 0.2967 0.2127 0.062 Uiso 1 1 calc R . . 
C44 C 1.1012(2) 0.2114(2) 0.2586(2) 0.0538(7) Uani 1 1 d . . . 
H44 H 1.1604 0.2208 0.2283 0.065 Uiso 1 1 calc R . . 
C45 C 1.0926(2) 0.1554(2) 0.3145(2) 0.0486(7) Uani 1 1 d . . . 
H45 H 1.1486 0.1304 0.3249 0.058 Uiso 1 1 calc R . . 
C46 C 1.0010(2) 0.1349(2) 0.35651(19) 0.0407(6) Uani 1 1 d . . . 
C47 C 0.8415(2) 0.2789(2) 0.27393(19) 0.0408(6) Uani 1 1 d . . . 
C48 C 0.9994(2) 0.0781(2) 0.4200(2) 0.0463(7) Uani 1 1 d . . . 
N1A N 0.7225(2) 0.4508(2) 0.4045(2) 0.0613(7) Uani 1 1 d . . . 
C1A C 0.6206(3) 0.3632(3) 0.3755(3) 0.0716(10) Uani 1 1 d . . . 
H1A H 0.6085 0.2889 0.3287 0.086 Uiso 1 1 calc R . . 
C2A C 0.5321(3) 0.3791(3) 0.4128(3) 0.0678(9) Uani 1 1 d . . . 
H2A H 0.4616 0.3158 0.3925 0.081 Uiso 1 1 calc R . . 
C3A C 0.5477(2) 0.4889(2) 0.4804(2) 0.0450(6) Uani 1 1 d . . . 
C4A C 0.6547(3) 0.5787(3) 0.5090(3) 0.0707(10) Uani 1 1 d . . . 
H4A H 0.6687 0.6542 0.5542 0.085 Uiso 1 1 calc R . . 
C5A C 0.7407(3) 0.5571(3) 0.4711(3) 0.0802(11) Uani 1 1 d . . . 
H5A H 0.8133 0.6182 0.4925 0.096 Uiso 1 1 calc R . . 
N1B N 0.2650(2) 0.5222(2) 0.0850(2) 0.0630(7) Uani 1 1 d . . . 
C1B C 0.3600(3) 0.6164(3) 0.1146(3) 0.0662(9) Uani 1 1 d . . . 
H1B H 0.3637 0.6881 0.1585 0.079 Uiso 1 1 calc R . . 
C2B C 0.4537(3) 0.6106(3) 0.0817(2) 0.0622(8) Uani 1 1 d . . . 
H2B H 0.5202 0.6781 0.1032 0.075 Uiso 1 1 calc R . . 
C3B C 0.4491(2) 0.5048(2) 0.0167(2) 0.0471(7) Uani 1 1 d . . . 
C4B C 0.3478(3) 0.4077(3) -0.0134(3) 0.0782(11) Uani 1 1 d . . . 
H4B H 0.3413 0.3348 -0.0574 0.094 Uiso 1 1 calc R . . 
C5B C 0.2568(3) 0.4188(3) 0.0218(3) 0.0852(12) Uani 1 1 d . . . 
H5B H 0.1886 0.3531 0.0010 0.102 Uiso 1 1 calc R . . 
 
loop_ 
 _atom_site_aniso_label 
 _atom_site_aniso_U_11 
 _atom_site_aniso_U_22 
 _atom_site_aniso_U_33 
 _atom_site_aniso_U_23 
 _atom_site_aniso_U_13 
 _atom_site_aniso_U_12 
O11 0.0485(14) 0.0917(16) 0.1063(18) 0.0679(15) 0.0328(13) 0.0392(12) 
O12 0.0446(14) 0.116(2) 0.138(2) 0.0859(19) 0.0254(14) 0.0450(14) 
O13 0.0407(12) 0.0523(12) 0.0533(11) 0.0206(10) 0.0072(9) 0.0176(10) 
O14 0.0466(12) 0.0455(11) 0.0645(13) 0.0205(10) 0.0159(10) 0.0215(10) 
C11 0.0259(13) 0.0288(12) 0.0390(14) 0.0061(11) 0.0089(11) 0.0092(11) 
C12 0.0277(14) 0.0331(13) 0.0525(16) 0.0112(12) 0.0122(12) 0.0136(12) 
C13 0.0376(17) 0.0499(16) 0.0654(19) 0.0189(15) 0.0219(14) 0.0256(14) 
C14 0.0462(18) 0.0610(18) 0.066(2) 0.0238(16) 0.0367(16) 0.0252(16) 
C15 0.0508(18) 0.0560(17) 0.0545(17) 0.0272(15) 0.0277(15) 0.0244(15) 
C16 0.0334(15) 0.0348(13) 0.0392(14) 0.0092(12) 0.0124(11) 0.0133(12) 
C17 0.0342(17) 0.0429(15) 0.0614(18) 0.0190(14) 0.0127(14) 0.0188(13) 
C18 0.0415(17) 0.0423(15) 0.0353(14) 0.0146(12) 0.0135(12) 0.0185(14) 
O23 0.0571(14) 0.0520(12) 0.0469(12) 0.0096(10) 0.0129(10) 0.0140(10) 
O22 0.0328(12) 0.0557(12) 0.0811(15) 0.0065(11) 0.0123(10) 0.0197(10) 
O21 0.0490(13) 0.0458(11) 0.0920(16) 0.0123(11) 0.0170(12) 0.0256(10) 
O24 0.0762(16) 0.0388(12) 0.0835(16) 0.0168(11) 0.0145(13) 0.0123(11) 
C21 0.0295(14) 0.0416(14) 0.0417(14) 0.0199(12) 0.0107(11) 0.0173(12) 
C22 0.0344(15) 0.0444(14) 0.0394(14) 0.0206(12) 0.0118(12) 0.0222(12) 
C23 0.0407(17) 0.0594(18) 0.0461(16) 0.0224(14) 0.0185(13) 0.0260(15) 
C24 0.0389(18) 0.072(2) 0.0654(19) 0.0321(17) 0.0298(15) 0.0253(17) 
C25 0.0311(16) 0.0576(18) 0.0660(19) 0.0303(16) 0.0163(14) 0.0141(14) 
C26 0.0313(15) 0.0443(15) 0.0500(16) 0.0205(13) 0.0108(12) 0.0155(13) 
C27 0.0378(16) 0.0485(16) 0.0350(14) 0.0152(12) 0.0120(12) 0.0198(13) 
C28 0.0297(16) 0.0400(16) 0.0605(19) 0.0125(14) 0.0086(13) 0.0071(13) 
O31 0.0351(12) 0.0567(12) 0.0723(14) 0.0129(11) 0.0103(10) 0.0204(10) 
O32 0.0496(13) 0.0500(12) 0.0784(14) 0.0162(11) 0.0116(11) 0.0274(10) 
O33 0.0534(14) 0.0494(12) 0.0536(12) 0.0079(10) 0.0108(10) 0.0153(10) 
O34 0.0571(15) 0.0384(12) 0.1042(18) 0.0166(12) 0.0215(13) 0.0169(11) 
C31 0.0287(14) 0.0377(14) 0.0456(15) 0.0205(12) 0.0103(11) 0.0157(12) 
C32 0.0321(15) 0.0441(15) 0.0423(15) 0.0201(13) 0.0117(12) 0.0189(12) 
C33 0.0412(18) 0.0633(19) 0.0521(17) 0.0235(15) 0.0228(14) 0.0229(16) 
C34 0.0396(19) 0.079(2) 0.073(2) 0.0335(19) 0.0273(16) 0.0189(18) 
C35 0.0307(16) 0.0565(18) 0.077(2) 0.0312(17) 0.0163(15) 0.0121(14) 
C36 0.0333(15) 0.0422(15) 0.0586(17) 0.0251(14) 0.0138(13) 0.0179(13) 
C37 0.0399(17) 0.0499(16) 0.0408(15) 0.0216(13) 0.0157(13) 0.0216(14) 
C38 0.0255(15) 0.0350(15) 0.0662(19) 0.0104(14) 0.0100(13) 0.0083(12) 
O41 0.0414(12) 0.0522(12) 0.0569(12) 0.0233(10) 0.0053(10) 0.0190(10) 
O42 0.0477(12) 0.0433(11) 0.0667(13) 0.0199(10) 0.0159(10) 0.0229(9) 
O43 0.0499(14) 0.0789(15) 0.0973(17) 0.0583(14) 0.0308(12) 0.0364(12) 
O44 0.0400(13) 0.1065(18) 0.123(2) 0.0770(17) 0.0249(13) 0.0408(13) 
C41 0.0290(14) 0.0298(12) 0.0404(14) 0.0108(11) 0.0108(11) 0.0124(11) 
C42 0.0346(15) 0.0358(13) 0.0370(13) 0.0098(11) 0.0121(11) 0.0157(12) 
C43 0.0452(18) 0.0522(17) 0.0559(17) 0.0265(15) 0.0218(14) 0.0179(14) 
C44 0.0391(17) 0.0564(17) 0.0602(18) 0.0218(15) 0.0267(14) 0.0205(14) 
C45 0.0345(16) 0.0436(15) 0.0585(17) 0.0146(14) 0.0168(13) 0.0207(13) 
C46 0.0310(15) 0.0316(13) 0.0472(15) 0.0105(12) 0.0102(12) 0.0132(12) 
C47 0.0434(17) 0.0394(15) 0.0332(14) 0.0132(12) 0.0111(12) 0.0181(13) 
C48 0.0305(16) 0.0412(15) 0.0593(17) 0.0184(14) 0.0103(13) 0.0170(13) 
N1A 0.0477(17) 0.0787(19) 0.0639(17) 0.0341(15) 0.0213(13) 0.0351(16) 
C1A 0.069(2) 0.058(2) 0.079(2) 0.0187(18) 0.0291(19) 0.036(2) 
C2A 0.054(2) 0.0456(17) 0.081(2) 0.0142(16) 0.0255(18) 0.0179(16) 
C3A 0.0352(16) 0.0435(15) 0.0434(15) 0.0151(12) 0.0089(12) 0.0133(13) 
C4A 0.0420(19) 0.0502(19) 0.081(2) 0.0076(17) 0.0213(17) 0.0112(16) 
C5A 0.042(2) 0.070(2) 0.096(3) 0.022(2) 0.0263(19) 0.0134(18) 
N1B 0.0413(16) 0.0722(18) 0.0625(16) 0.0236(15) 0.0166(13) 0.0236(14) 
C1B 0.058(2) 0.059(2) 0.077(2) 0.0217(17) 0.0271(18) 0.0337(19) 
C2B 0.0506(19) 0.0453(17) 0.077(2) 0.0199(16) 0.0299(17) 0.0174(15) 
C3B 0.0288(16) 0.0501(16) 0.0465(16) 0.0144(13) 0.0102(12) 0.0133(13) 
C4B 0.0360(18) 0.0548(19) 0.087(2) -0.0008(17) 0.0212(17) 0.0054(16) 
C5B 0.0364(19) 0.067(2) 0.097(3) 0.006(2) 0.0259(18) 0.0073(17) 
 
_geom_special_details 
; 
 All esds (except the esd in the dihedral angle between two l.s. planes) 
 are estimated using the full covariance matrix.  The cell esds are taken 
 into account individually in the estimation of esds in distances, angles 
 and torsion angles; correlations between esds in cell parameters are only 
 used when they are defined by crystal symmetry.  An approximate (isotropic) 
 treatment of cell esds is used for estimating esds involving l.s. planes. 
; 
 
loop_ 
 _geom_bond_atom_site_label_1 
 _geom_bond_atom_site_label_2 
 _geom_bond_distance 
 _geom_bond_site_symmetry_2 
 _geom_bond_publ_flag 
O11 C17 1.246(3) . ? 
O12 C17 1.280(3) . ? 
O13 C18 1.255(3) . ? 
O14 C18 1.249(3) . ? 
C11 C16 1.394(4) . ? 
C11 C12 1.406(3) . ? 
C11 C21 1.512(3) . ? 
C12 C13 1.402(3) . ? 
C12 C17 1.470(4) . ? 
C13 C14 1.366(4) . ? 
C14 C15 1.380(4) . ? 
C15 C16 1.395(3) . ? 
C16 C18 1.511(4) . ? 
O23 C28 1.306(4) . ? 
O22 C27 1.218(3) . ? 
O21 C27 1.310(3) . ? 
O24 C28 1.222(3) . ? 
C21 C26 1.391(3) . ? 
C21 C22 1.400(3) . ? 
C22 C23 1.401(3) . ? 
C22 C27 1.477(4) . ? 
C23 C24 1.371(4) . ? 
C24 C25 1.372(4) . ? 
C25 C26 1.398(4) . ? 
C26 C28 1.494(4) . ? 
O31 C37 1.209(3) . ? 
O32 C37 1.320(3) . ? 
O33 C38 1.329(4) . ? 
O34 C38 1.209(3) . ? 
C31 C32 1.396(3) . ? 
C31 C36 1.403(4) . ? 
C31 C41 1.505(3) . ? 
C32 C33 1.392(3) . ? 
C32 C37 1.488(4) . ? 
C33 C34 1.370(4) . ? 
C34 C35 1.373(4) . ? 
C35 C36 1.394(4) . ? 
C36 C38 1.485(4) . ? 
O41 C47 1.254(3) . ? 
O42 C47 1.253(3) . ? 
O43 C48 1.233(3) . ? 
O44 C48 1.303(3) . ? 
C41 C42 1.398(3) . ? 
C41 C46 1.400(3) . ? 
C42 C43 1.387(3) . ? 
C42 C47 1.515(3) . ? 
C43 C44 1.386(4) . ? 
C44 C45 1.366(4) . ? 
C45 C46 1.400(3) . ? 
C46 C48 1.478(4) . ? 
N1A C1A 1.319(4) . ? 
N1A C5A 1.324(4) . ? 
C1A C2A 1.372(4) . ? 
C2A C3A 1.377(4) . ? 
C3A C4A 1.377(4) . ? 
C3A C3A 1.495(5) 2_666 ? 
C4A C5A 1.370(4) . ? 
N1B C1B 1.314(4) . ? 
N1B C5B 1.326(4) . ? 
C1B C2B 1.370(4) . ? 
C2B C3B 1.378(4) . ? 
C3B C4B 1.379(4) . ? 
C3B C3B 1.484(5) 2_665 ? 
C4B C5B 1.370(4) . ? 
 
loop_ 
 _geom_angle_atom_site_label_1 
 _geom_angle_atom_site_label_2 
 _geom_angle_atom_site_label_3 
 _geom_angle 
 _geom_angle_site_symmetry_1 
 _geom_angle_site_symmetry_3 
 _geom_angle_publ_flag 
C16 C11 C12 118.5(2) . . ? 
C16 C11 C21 117.6(2) . . ? 
C12 C11 C21 123.9(2) . . ? 
C13 C12 C11 119.1(2) . . ? 
C13 C12 C17 117.4(2) . . ? 
C11 C12 C17 123.5(2) . . ? 
C14 C13 C12 121.6(3) . . ? 
C13 C14 C15 119.8(2) . . ? 
C14 C15 C16 119.8(3) . . ? 
C11 C16 C15 121.1(2) . . ? 
C11 C16 C18 120.5(2) . . ? 
C15 C16 C18 118.3(2) . . ? 
O11 C17 O12 122.1(3) . . ? 
O11 C17 C12 121.9(2) . . ? 
O12 C17 C12 115.9(3) . . ? 
O14 C18 O13 124.3(2) . . ? 
O14 C18 C16 117.5(2) . . ? 
O13 C18 C16 118.2(2) . . ? 
C26 C21 C22 118.5(2) . . ? 
C26 C21 C11 120.7(2) . . ? 
C22 C21 C11 120.7(2) . . ? 
C23 C22 C21 119.8(2) . . ? 
C23 C22 C27 118.7(2) . . ? 
C21 C22 C27 121.5(2) . . ? 
C24 C23 C22 120.9(2) . . ? 
C25 C24 C23 119.6(2) . . ? 
C24 C25 C26 120.6(3) . . ? 
C21 C26 C25 120.5(2) . . ? 
C21 C26 C28 121.5(2) . . ? 
C25 C26 C28 118.0(2) . . ? 
O22 C27 O21 121.9(2) . . ? 
O22 C27 C22 122.5(2) . . ? 
O21 C27 C22 115.5(2) . . ? 
O24 C28 O23 122.0(3) . . ? 
O24 C28 C26 121.3(3) . . ? 
O23 C28 C26 116.6(3) . . ? 
C32 C31 C36 118.9(2) . . ? 
C32 C31 C41 120.9(2) . . ? 
C36 C31 C41 120.1(2) . . ? 
C33 C32 C31 120.1(2) . . ? 
C33 C32 C37 119.6(2) . . ? 
C31 C32 C37 120.3(2) . . ? 
C32 C33 C34 120.4(3) . . ? 
C35 C34 C33 120.4(3) . . ? 
C34 C35 C36 120.4(3) . . ? 
C31 C36 C35 119.7(2) . . ? 
C31 C36 C38 122.4(2) . . ? 
C35 C36 C38 117.8(2) . . ? 
O31 C37 O32 122.8(3) . . ? 
O31 C37 C32 123.0(2) . . ? 
O32 C37 C32 114.2(2) . . ? 
O34 C38 O33 120.6(3) . . ? 
O34 C38 C36 123.0(3) . . ? 
O33 C38 C36 116.3(2) . . ? 
C42 C41 C46 118.7(2) . . ? 
C42 C41 C31 118.5(2) . . ? 
C46 C41 C31 122.8(2) . . ? 
C41 C42 C43 121.1(2) . . ? 
C41 C42 C47 118.5(2) . . ? 
C43 C42 C47 120.4(2) . . ? 
C44 C43 C42 119.6(3) . . ? 
C45 C44 C43 120.1(2) . . ? 
C44 C45 C46 121.1(2) . . ? 
C45 C46 C41 119.3(2) . . ? 
C45 C46 C48 118.5(2) . . ? 
C41 C46 C48 122.2(2) . . ? 
O42 C47 O41 123.8(2) . . ? 
O42 C47 C42 117.9(2) . . ? 
O41 C47 C42 118.3(2) . . ? 
O43 C48 O44 121.5(3) . . ? 
O43 C48 C46 122.8(2) . . ? 
O44 C48 C46 115.6(2) . . ? 
C1A N1A C5A 119.8(3) . . ? 
N1A C1A C2A 121.6(3) . . ? 
C3A C2A C1A 119.9(3) . . ? 
C2A C3A C4A 117.2(3) . . ? 
C2A C3A C3A 121.9(3) . 2_666 ? 
C4A C3A C3A 120.8(3) . 2_666 ? 
C5A C4A C3A 120.1(3) . . ? 
N1A C5A C4A 121.3(3) . . ? 
C1B N1B C5B 120.8(3) . . ? 
N1B C1B C2B 121.0(3) . . ? 
C3B C2B C1B 120.0(3) . . ? 
C2B C3B C4B 117.5(3) . . ? 
C2B C3B C3B 121.3(3) . 2_665 ? 
C4B C3B C3B 121.2(3) . 2_665 ? 
C5B C4B C3B 120.0(3) . . ? 
N1B C5B C4B 120.7(3) . . ? 
 
_diffrn_measured_fraction_theta_max    0.962 
_diffrn_reflns_theta_full              26.69 
_diffrn_measured_fraction_theta_full   0.962 
_refine_diff_density_max    0.538 
_refine_diff_density_min   -0.247 
_refine_diff_density_rms    0.065 
 
data_11 
 
_audit_creation_method            SHELXL-97 
_chemical_name_systematic 
; 
 ? 
; 
_chemical_name_common             ? 
_chemical_melting_point           ? 
_chemical_formula_moiety          ? 
_chemical_formula_sum 
 'C48 H33 Cl N2 O16' 
_chemical_formula_weight          929.21 
 
loop_ 
 _atom_type_symbol 
 _atom_type_description 
 _atom_type_scat_dispersion_real 
 _atom_type_scat_dispersion_imag 
 _atom_type_scat_source 
 'C'  'C'   0.0033   0.0016 
 'International Tables Vol C Tables 4.2.6.8 and 6.1.1.4' 
 'H'  'H'   0.0000   0.0000 
 'International Tables Vol C Tables 4.2.6.8 and 6.1.1.4' 
 'N'  'N'   0.0061   0.0033 
 'International Tables Vol C Tables 4.2.6.8 and 6.1.1.4' 
 'O'  'O'   0.0106   0.0060 
 'International Tables Vol C Tables 4.2.6.8 and 6.1.1.4' 
 'Cl'  'Cl'   0.1484   0.1585 
 'International Tables Vol C Tables 4.2.6.8 and 6.1.1.4' 
 
_symmetry_cell_setting            Triclinic
_symmetry_space_group_name_H-M    P-1
 
loop_ 
 _symmetry_equiv_pos_as_xyz 
 'x, y, z' 
 '-x, -y, -z' 
 
_cell_length_a                    8.0922(10) 
_cell_length_b                    12.4611(15) 
_cell_length_c                    12.587(2) 
_cell_angle_alpha                 113.496(5) 
_cell_angle_beta                  96.338(5) 
_cell_angle_gamma                 106.722(4) 
_cell_volume                      1077.5(3) 
_cell_formula_units_Z             1 
_cell_measurement_temperature     293(2) 
_cell_measurement_reflns_used     4312  
_cell_measurement_theta_min       1.83 
_cell_measurement_theta_max       26.36  
 
_exptl_crystal_description       block
_exptl_crystal_colour            colorless
_exptl_crystal_size_max           0.21
_exptl_crystal_size_mid           0.15
_exptl_crystal_size_min           0.13
_exptl_crystal_density_meas       'not measured'
_exptl_crystal_density_diffrn     1.432 
_exptl_crystal_density_method     'not measured' 
_exptl_crystal_F_000              480 
_exptl_absorpt_coefficient_mu     0.168 
_exptl_absorpt_correction_type    empirical
_exptl_absorpt_correction_T_min   0.970
_exptl_absorpt_correction_T_max   0.978
_exptl_absorpt_process_details    sadabs
 
_exptl_special_details 
; 
 ? 
; 
 
_diffrn_ambient_temperature       293(2) 
_diffrn_radiation_wavelength      0.71073 
_diffrn_radiation_type            MoK\a 
_diffrn_radiation_source          'fine-focus sealed tube' 
_diffrn_radiation_monochromator   graphite 
_diffrn_measurement_device_type   'Bruker CCD APEX 2'
_diffrn_measurement_method        'hemisphere'
_diffrn_detector_area_resol_mean  ? 
_diffrn_standards_number          ? 
_diffrn_standards_interval_count  ? 
_diffrn_standards_interval_time   ? 
_diffrn_standards_decay_%         ? 
_diffrn_reflns_number             14040 
_diffrn_reflns_av_R_equivalents   0.0614 
_diffrn_reflns_av_sigmaI/netI     0.0743 
_diffrn_reflns_limit_h_min        -10 
_diffrn_reflns_limit_h_max        9 
_diffrn_reflns_limit_k_min        -15 
_diffrn_reflns_limit_k_max        15 
_diffrn_reflns_limit_l_min        -14 
_diffrn_reflns_limit_l_max        15 
_diffrn_reflns_theta_min          1.83 
_diffrn_reflns_theta_max          26.36 
_reflns_number_total              4312 
_reflns_number_gt                 2200 
_reflns_threshold_expression      >2sigma(I) 
 
_computing_data_collection        ? 
_computing_cell_refinement        ? 
_computing_data_reduction         ? 
_computing_structure_solution     'SHELXS-97 (Sheldrick, 1990)' 
_computing_structure_refinement   'SHELXL-97 (Sheldrick, 1997)' 
_computing_molecular_graphics     ? 
_computing_publication_material   ? 
 
_refine_special_details 
; 
 Refinement of F^2^ against ALL reflections.  The weighted R-factor wR and 
 goodness of fit S are based on F^2^, conventional R-factors R are based 
 on F, with F set to zero for negative F^2^. The threshold expression of 
 F^2^ > 2sigma(F^2^) is used only for calculating R-factors(gt) etc. and is 
 not relevant to the choice of reflections for refinement.  R-factors based 
 on F^2^ are statistically about twice as large as those based on F, and R- 
 factors based on ALL data will be even larger. 
; 
 
_refine_ls_structure_factor_coef  Fsqd  
_refine_ls_matrix_type            full 
_refine_ls_weighting_scheme       calc  
_refine_ls_weighting_details 
 'calc w=1/[\s^2^(Fo^2^)+(0.0863P)^2^+0.3054P] where P=(Fo^2^+2Fc^2^)/3' 
_atom_sites_solution_primary      direct 
_atom_sites_solution_secondary    difmap 
_atom_sites_solution_hydrogens    geom 
_refine_ls_hydrogen_treatment     mixed 
_refine_ls_extinction_method      none 
_refine_ls_extinction_coef        ? 
_refine_ls_number_reflns          4312 
_refine_ls_number_parameters      346 
_refine_ls_number_restraints      0 
_refine_ls_R_factor_all           0.1418 
_refine_ls_R_factor_gt            0.0635 
_refine_ls_wR_factor_ref          0.1871 
_refine_ls_wR_factor_gt           0.1455 
_refine_ls_goodness_of_fit_ref    0.958 
_refine_ls_restrained_S_all       0.958 
_refine_ls_shift/su_max           0.012 
_refine_ls_shift/su_mean          0.001 
 
loop_ 
 _atom_site_label 
 _atom_site_type_symbol 
 _atom_site_fract_x 
 _atom_site_fract_y 
 _atom_site_fract_z 
 _atom_site_U_iso_or_equiv 
 _atom_site_adp_type 
 _atom_site_occupancy 
 _atom_site_symmetry_multiplicity 
 _atom_site_calc_flag 
 _atom_site_refinement_flags 
 _atom_site_disorder_assembly 
 _atom_site_disorder_group 
O11 O 0.5060(3) 0.2814(2) 1.1186(2) 0.0581(7) Uani 1 1 d . . . 
O12 O 0.2901(3) 0.3304(2) 1.0524(2) 0.0584(7) Uani 1 1 d . . . 
H12O H 0.224(4) 0.330(3) 0.978(3) 0.050 Uiso 1 1 d . . . 
O13 O 0.1464(4) -0.0800(3) 0.5896(2) 0.0972(12) Uani 1 1 d . . . 
O14 O 0.2722(4) 0.0180(3) 0.4938(2) 0.0694(8) Uani 1 1 d . . . 
H14O H 0.185(4) -0.051(3) 0.428(3) 0.050 Uiso 1 1 d . . . 
C11 C 0.3370(4) 0.1441(3) 0.8139(3) 0.0394(8) Uani 1 1 d . . . 
C12 C 0.4580(4) 0.2482(3) 0.9165(3) 0.0441(8) Uani 1 1 d . . . 
C13 C 0.6180(4) 0.3205(3) 0.9086(3) 0.0558(10) Uani 1 1 d . . . 
H13 H 0.6989 0.3878 0.9777 0.067 Uiso 1 1 calc R . . 
C14 C 0.6583(5) 0.2937(3) 0.7998(3) 0.0592(10) Uani 1 1 d . . . 
H14 H 0.7659 0.3425 0.7952 0.071 Uiso 1 1 calc R . . 
C15 C 0.5387(4) 0.1947(3) 0.6983(3) 0.0513(9) Uani 1 1 d . . . 
H15 H 0.5647 0.1778 0.6245 0.062 Uiso 1 1 calc R . . 
C16 C 0.3784(4) 0.1187(3) 0.7036(3) 0.0398(8) Uani 1 1 d . . . 
C17 C 0.4186(4) 0.2864(3) 1.0367(3) 0.0467(8) Uani 1 1 d . . . 
C18 C 0.2541(4) 0.0102(3) 0.5919(3) 0.0453(8) Uani 1 1 d . . . 
O21 O 0.4323(3) -0.0346(3) 0.8504(3) 0.0814(9) Uani 1 1 d . . . 
O22 O 0.2454(3) -0.1724(2) 0.8906(2) 0.0649(7) Uani 1 1 d . . . 
H22O H 0.349(4) -0.200(3) 0.896(3) 0.050 Uiso 1 1 d . . . 
O23 O -0.0342(3) 0.1932(2) 0.6794(2) 0.0531(6) Uani 1 1 d . . . 
O24 O 0.1370(3) 0.3244(2) 0.8624(2) 0.0557(7) Uani 1 1 d . . . 
C21 C 0.1629(4) 0.0704(3) 0.8255(3) 0.0375(7) Uani 1 1 d . . . 
C22 C 0.1390(4) -0.0327(3) 0.8500(2) 0.0388(8) Uani 1 1 d . . . 
C23 C -0.0273(4) -0.0949(3) 0.8597(3) 0.0442(8) Uani 1 1 d . . . 
H23 H -0.0429 -0.1626 0.8769 0.053 Uiso 1 1 calc R . . 
C24 C -0.1696(4) -0.0577(3) 0.8444(3) 0.0466(9) Uani 1 1 d . . . 
H24 H -0.2798 -0.1002 0.8512 0.056 Uiso 1 1 calc R . . 
C25 C -0.1478(4) 0.0421(3) 0.8190(3) 0.0463(8) Uani 1 1 d . . . 
H25 H -0.2440 0.0665 0.8075 0.056 Uiso 1 1 calc R . . 
C26 C 0.0172(4) 0.1069(3) 0.8103(3) 0.0403(8) Uani 1 1 d . . . 
C27 C 0.2885(4) -0.0776(3) 0.8628(3) 0.0450(8) Uani 1 1 d . . . 
C28 C 0.0410(4) 0.2163(3) 0.7831(3) 0.0430(8) Uani 1 1 d . . . 
N1 N 0.1941(4) 0.2952(4) 0.5680(4) 0.0673(10) Uani 1 1 d . . . 
H1N H 0.111(4) 0.251(3) 0.588(3) 0.050 Uiso 1 1 d . . . 
C1 C 0.2954(6) 0.4056(4) 0.6542(4) 0.0836(14) Uani 1 1 d . . . 
H1 H 0.2846 0.4283 0.7322 0.100 Uiso 1 1 calc R . . 
C2 C 0.4168(6) 0.4870(4) 0.6290(4) 0.0845(15) Uani 1 1 d . . . 
H2 H 0.4879 0.5658 0.6904 0.101 Uiso 1 1 calc R . . 
C3 C 0.4368(4) 0.4552(3) 0.5148(3) 0.0524(9) Uani 1 1 d . . . 
C4 C 0.3318(6) 0.3370(4) 0.4300(4) 0.0835(15) Uani 1 1 d . . . 
H4 H 0.3417 0.3099 0.3515 0.100 Uiso 1 1 calc R . . 
C5 C 0.2125(6) 0.2580(4) 0.4592(4) 0.0919(16) Uani 1 1 d . . . 
H5 H 0.1436 0.1769 0.4009 0.110 Uiso 1 1 calc R . . 
Cl Cl 0.853(2) 0.431(2) 0.6079(18) 0.277(9) Uani 0.50 1 d P . . 
C101 C 0.837(9) 0.362(7) 0.443(5) 0.28(4) Uani 0.50 1 d P . . 
C102 C 1.049(8) 0.587(6) 0.633(4) 0.22(3) Uani 0.50 1 d P . . 
C103 C 0.958(5) 0.544(3) 0.675(6) 0.26(3) Uani 0.50 1 d P . . 
C104 C 0.814(2) 0.369(3) 0.527(6) 0.19(2) Uani 0.50 1 d P . . 
C105 C 0.961(3) 0.470(4) 0.521(3) 0.138(10) Uani 0.50 1 d P . . 
C106 C 1.067(3) 0.595(3) 0.5867(17) 0.089(5) Uani 0.50 1 d P . . 
 
loop_ 
 _atom_site_aniso_label 
 _atom_site_aniso_U_11 
 _atom_site_aniso_U_22 
 _atom_site_aniso_U_33 
 _atom_site_aniso_U_23 
 _atom_site_aniso_U_13 
 _atom_site_aniso_U_12 
O11 0.0607(15) 0.0665(17) 0.0409(14) 0.0207(13) 0.0033(12) 0.0232(13) 
O12 0.0589(15) 0.0728(17) 0.0409(14) 0.0203(13) 0.0117(12) 0.0286(14) 
O13 0.109(2) 0.077(2) 0.0447(17) 0.0159(15) 0.0198(16) -0.0331(18) 
O14 0.0753(18) 0.0706(18) 0.0400(15) 0.0267(14) 0.0070(13) -0.0036(15) 
C11 0.0349(17) 0.0425(19) 0.0406(19) 0.0201(16) 0.0124(14) 0.0109(14) 
C12 0.0408(18) 0.046(2) 0.041(2) 0.0188(16) 0.0126(15) 0.0101(16) 
C13 0.045(2) 0.053(2) 0.053(2) 0.0198(19) 0.0046(17) 0.0042(17) 
C14 0.041(2) 0.059(2) 0.065(3) 0.029(2) 0.0167(18) -0.0017(17) 
C15 0.047(2) 0.057(2) 0.053(2) 0.0264(19) 0.0255(17) 0.0158(18) 
C16 0.0362(17) 0.0413(18) 0.0391(19) 0.0183(16) 0.0126(14) 0.0090(14) 
C17 0.0409(19) 0.044(2) 0.041(2) 0.0130(16) 0.0052(16) 0.0063(16) 
C18 0.048(2) 0.050(2) 0.039(2) 0.0201(17) 0.0215(16) 0.0152(17) 
O21 0.0494(16) 0.098(2) 0.137(3) 0.081(2) 0.0399(17) 0.0342(15) 
O22 0.0552(15) 0.0720(18) 0.092(2) 0.0566(17) 0.0258(14) 0.0262(14) 
O23 0.0519(14) 0.0647(16) 0.0423(14) 0.0298(12) 0.0109(11) 0.0130(12) 
O24 0.0591(15) 0.0505(15) 0.0477(15) 0.0199(13) 0.0030(12) 0.0137(12) 
C21 0.0357(17) 0.0453(19) 0.0280(17) 0.0164(15) 0.0110(13) 0.0090(14) 
C22 0.0377(17) 0.0466(19) 0.0279(17) 0.0164(15) 0.0102(13) 0.0093(15) 
C23 0.0453(19) 0.052(2) 0.0380(19) 0.0249(17) 0.0160(15) 0.0126(16) 
C24 0.0356(18) 0.058(2) 0.044(2) 0.0272(18) 0.0174(15) 0.0065(16) 
C25 0.0353(18) 0.059(2) 0.046(2) 0.0267(18) 0.0143(15) 0.0141(16) 
C26 0.0386(18) 0.0475(19) 0.0306(17) 0.0161(15) 0.0125(14) 0.0110(15) 
C27 0.0380(19) 0.049(2) 0.042(2) 0.0207(17) 0.0092(15) 0.0081(16) 
C28 0.0343(17) 0.054(2) 0.042(2) 0.0238(18) 0.0128(15) 0.0136(16) 
N1 0.056(2) 0.074(3) 0.086(3) 0.054(2) 0.028(2) 0.0121(18) 
C1 0.101(3) 0.076(3) 0.065(3) 0.034(3) 0.041(3) 0.010(3) 
C2 0.105(3) 0.062(3) 0.050(3) 0.015(2) 0.031(2) -0.008(2) 
C3 0.051(2) 0.051(2) 0.044(2) 0.0196(17) 0.0145(17) 0.0058(17) 
C4 0.086(3) 0.065(3) 0.052(2) 0.014(2) 0.016(2) -0.020(2) 
C5 0.088(3) 0.072(3) 0.070(3) 0.028(3) 0.017(3) -0.026(2) 
Cl 0.243(12) 0.51(2) 0.406(16) 0.401(18) 0.221(12) 0.262(15) 
C101 0.39(8) 0.38(9) 0.17(3) 0.13(4) 0.08(4) 0.28(8) 
C102 0.28(6) 0.20(4) 0.17(4) 0.07(4) -0.01(4) 0.13(4) 
C103 0.16(2) 0.082(13) 0.46(9) 0.09(3) -0.02(3) -0.001(13) 
C104 0.064(8) 0.093(12) 0.46(6) 0.18(2) 0.043(19) 0.021(8) 
C105 0.118(16) 0.26(3) 0.16(3) 0.16(2) 0.073(14) 0.13(2) 
C106 0.090(11) 0.106(13) 0.052(12) 0.025(9) 0.002(8) 0.032(9) 
 
_geom_special_details 
; 
 All esds (except the esd in the dihedral angle between two l.s. planes) 
 are estimated using the full covariance matrix.  The cell esds are taken 
 into account individually in the estimation of esds in distances, angles 
 and torsion angles; correlations between esds in cell parameters are only 
 used when they are defined by crystal symmetry.  An approximate (isotropic) 
 treatment of cell esds is used for estimating esds involving l.s. planes. 
; 
 
loop_ 
 _geom_bond_atom_site_label_1 
 _geom_bond_atom_site_label_2 
 _geom_bond_distance 
 _geom_bond_site_symmetry_2 
 _geom_bond_publ_flag 
O11 C17 1.218(4) . ? 
O12 C17 1.306(4) . ? 
O13 C18 1.195(4) . ? 
O14 C18 1.298(4) . ? 
C11 C16 1.398(4) . ? 
C11 C12 1.401(4) . ? 
C11 C21 1.502(4) . ? 
C12 C13 1.389(5) . ? 
C12 C17 1.495(5) . ? 
C13 C14 1.375(5) . ? 
C14 C15 1.369(5) . ? 
C15 C16 1.395(4) . ? 
C16 C18 1.485(4) . ? 
O21 C27 1.189(4) . ? 
O22 C27 1.326(4) . ? 
O23 C28 1.258(4) . ? 
O24 C28 1.252(4) . ? 
C21 C26 1.400(4) . ? 
C21 C22 1.404(4) . ? 
C22 C23 1.393(4) . ? 
C22 C27 1.490(4) . ? 
C23 C24 1.381(4) . ? 
C24 C25 1.373(5) . ? 
C25 C26 1.389(4) . ? 
C26 C28 1.499(5) . ? 
N1 C5 1.300(5) . ? 
N1 C1 1.306(5) . ? 
C1 C2 1.359(5) . ? 
C2 C3 1.372(5) . ? 
C3 C4 1.363(5) . ? 
C3 C3 1.480(6) 2_666 ? 
C4 C5 1.362(6) . ? 
Cl C104 0.95(5) . ? 
Cl C103 1.27(4) . ? 
Cl C105 1.606(17) . ? 
Cl C101 1.88(6) . ? 
Cl C102 2.00(7) . ? 
C101 C106 1.01(8) 2_766 ? 
C101 C104 1.08(6) . ? 
C101 C105 1.32(8) . ? 
C101 C102 1.58(7) 2_766 ? 
C102 C106 0.66(5) . ? 
C102 C103 1.09(7) . ? 
C102 C105 1.48(7) . ? 
C102 C101 1.58(7) 2_766 ? 
C102 C105 1.76(6) 2_766 ? 
C103 C106 1.69(7) . ? 
C103 C105 1.79(7) . ? 
C104 C105 1.50(4) . ? 
C104 C106 1.94(6) 2_766 ? 
C105 C105 1.16(4) 2_766 ? 
C105 C106 1.22(4) 2_766 ? 
C105 C106 1.38(5) . ? 
C105 C102 1.76(6) 2_766 ? 
C106 C101 1.01(8) 2_766 ? 
C106 C105 1.22(4) 2_766 ? 
C106 C104 1.94(6) 2_766 ? 
 
loop_ 
 _geom_angle_atom_site_label_1 
 _geom_angle_atom_site_label_2 
 _geom_angle_atom_site_label_3 
 _geom_angle 
 _geom_angle_site_symmetry_1 
 _geom_angle_site_symmetry_3 
 _geom_angle_publ_flag 
C16 C11 C12 118.3(3) . . ? 
C16 C11 C21 122.7(3) . . ? 
C12 C11 C21 118.8(3) . . ? 
C13 C12 C11 120.4(3) . . ? 
C13 C12 C17 117.9(3) . . ? 
C11 C12 C17 121.6(3) . . ? 
C14 C13 C12 120.8(3) . . ? 
C15 C14 C13 119.4(3) . . ? 
C14 C15 C16 121.2(3) . . ? 
C15 C16 C11 119.9(3) . . ? 
C15 C16 C18 119.6(3) . . ? 
C11 C16 C18 120.5(3) . . ? 
O11 C17 O12 120.7(3) . . ? 
O11 C17 C12 121.9(3) . . ? 
O12 C17 C12 117.4(3) . . ? 
O13 C18 O14 121.1(3) . . ? 
O13 C18 C16 123.8(3) . . ? 
O14 C18 C16 115.1(3) . . ? 
C26 C21 C22 118.7(3) . . ? 
C26 C21 C11 117.8(3) . . ? 
C22 C21 C11 123.5(3) . . ? 
C23 C22 C21 119.4(3) . . ? 
C23 C22 C27 120.0(3) . . ? 
C21 C22 C27 120.6(3) . . ? 
C24 C23 C22 121.1(3) . . ? 
C25 C24 C23 119.8(3) . . ? 
C24 C25 C26 120.3(3) . . ? 
C25 C26 C21 120.7(3) . . ? 
C25 C26 C28 120.2(3) . . ? 
C21 C26 C28 119.1(3) . . ? 
O21 C27 O22 122.3(3) . . ? 
O21 C27 C22 124.9(3) . . ? 
O22 C27 C22 112.8(3) . . ? 
O24 C28 O23 123.4(3) . . ? 
O24 C28 C26 119.2(3) . . ? 
O23 C28 C26 117.4(3) . . ? 
C5 N1 C1 121.7(4) . . ? 
N1 C1 C2 119.5(4) . . ? 
C1 C2 C3 121.4(4) . . ? 
C4 C3 C2 116.1(3) . . ? 
C4 C3 C3 122.0(4) . 2_666 ? 
C2 C3 C3 121.9(4) . 2_666 ? 
C5 C4 C3 120.7(4) . . ? 
N1 C5 C4 120.5(4) . . ? 
C104 Cl C103 142(3) . . ? 
C104 Cl C105 66(2) . . ? 
C103 Cl C105 76(3) . . ? 
C104 Cl C101 23(2) . . ? 
C103 Cl C101 119(3) . . ? 
C105 Cl C101 43(3) . . ? 
C104 Cl C102 113(2) . . ? 
C103 Cl C102 29(4) . . ? 
C105 Cl C102 47(2) . . ? 
C101 Cl C102 90(3) . . ? 
C106 C101 C104 137(9) 2_766 . ? 
C106 C101 C105 62(5) 2_766 . ? 
C104 C101 C105 77(4) . . ? 
C106 C101 C102 14(2) 2_766 2_766 ? 
C104 C101 C102 151(9) . 2_766 ? 
C105 C101 C102 74(5) . 2_766 ? 
C106 C101 Cl 119(6) 2_766 . ? 
C104 C101 Cl 20(3) . . ? 
C105 C101 Cl 57(2) . . ? 
C102 C101 Cl 131(6) 2_766 . ? 
C106 C102 C103 151(10) . . ? 
C106 C102 C105 68(7) . . ? 
C103 C102 C105 87(6) . . ? 
C106 C102 C101 22(5) . 2_766 ? 
C103 C102 C101 173(8) . 2_766 ? 
C105 C102 C101 86(4) . 2_766 ? 
C106 C102 C105 27(6) . 2_766 ? 
C103 C102 C105 127(7) . 2_766 ? 
C105 C102 C105 41(2) . 2_766 ? 
C101 C102 C105 46(3) 2_766 2_766 ? 
C106 C102 Cl 119(8) . . ? 
C103 C102 Cl 35(4) . . ? 
C105 C102 Cl 52(2) . . ? 
C101 C102 Cl 139(5) 2_766 . ? 
C105 C102 Cl 93(3) 2_766 . ? 
C102 C103 Cl 116(8) . . ? 
C102 C103 C106 11(4) . . ? 
Cl C103 C106 107(4) . . ? 
C102 C103 C105 55(5) . . ? 
Cl C103 C105 60(3) . . ? 
C106 C103 C105 46(2) . . ? 
Cl C104 C101 136(4) . . ? 
Cl C104 C105 78.5(18) . . ? 
C101 C104 C105 59(4) . . ? 
Cl C104 C106 117(2) . 2_766 ? 
C101 C104 C106 21(4) . 2_766 ? 
C105 C104 C106 39(2) . 2_766 ? 
C105 C105 C106 71(3) 2_766 2_766 ? 
C105 C105 C101 115(5) 2_766 . ? 
C106 C105 C101 47(3) 2_766 . ? 
C105 C105 C106 57(3) 2_766 . ? 
C106 C105 C106 127.2(18) 2_766 . ? 
C101 C105 C106 165(3) . . ? 
C105 C105 C102 83(5) 2_766 . ? 
C106 C105 C102 153(4) 2_766 . ? 
C101 C105 C102 158(3) . . ? 
C106 C105 C102 26(2) . . ? 
C105 C105 C104 158(5) 2_766 . ? 
C106 C105 C104 91(4) 2_766 . ? 
C101 C105 C104 44(3) . . ? 
C106 C105 C104 141(4) . . ? 
C102 C105 C104 116(3) . . ? 
C105 C105 Cl 161(5) 2_766 . ? 
C106 C105 Cl 126(4) 2_766 . ? 
C101 C105 Cl 79(3) . . ? 
C106 C105 Cl 106(3) . . ? 
C102 C105 Cl 81(3) . . ? 
C104 C105 Cl 35(2) . . ? 
C105 C105 C102 56(3) 2_766 2_766 ? 
C106 C105 C102 14(3) 2_766 2_766 ? 
C101 C105 C102 60(3) . 2_766 ? 
C106 C105 C102 113(3) . 2_766 ? 
C102 C105 C102 139(2) . 2_766 ? 
C104 C105 C102 104(4) . 2_766 ? 
Cl C105 C102 139(4) . 2_766 ? 
C105 C105 C103 119(5) 2_766 . ? 
C106 C105 C103 169(3) 2_766 . ? 
C101 C105 C103 122(3) . . ? 
C106 C105 C103 63(2) . . ? 
C102 C105 C103 37(2) . . ? 
C104 C105 C103 79(2) . . ? 
Cl C105 C103 43.5(11) . . ? 
C102 C105 C103 171(3) 2_766 . ? 
C102 C106 C101 144(7) . 2_766 ? 
C102 C106 C105 138(9) . 2_766 ? 
C101 C106 C105 72(4) 2_766 2_766 ? 
C102 C106 C105 86(8) . . ? 
C101 C106 C105 122(4) 2_766 . ? 
C105 C106 C105 52.8(18) 2_766 . ? 
C102 C106 C103 18(8) . . ? 
C101 C106 C103 162(4) 2_766 . ? 
C105 C106 C103 123(2) 2_766 . ? 
C105 C106 C103 70.7(15) . . ? 
C102 C106 C104 165(7) . 2_766 ? 
C101 C106 C104 22(4) 2_766 2_766 ? 
C105 C106 C104 51(2) 2_766 2_766 ? 
C105 C106 C104 102.7(18) . 2_766 ? 
C103 C106 C104 173(2) . 2_766 ? 
 
_diffrn_measured_fraction_theta_max    0.983 
_diffrn_reflns_theta_full              26.36 
_diffrn_measured_fraction_theta_full   0.983 
_refine_diff_density_max    0.231 
_refine_diff_density_min   -0.214 
_refine_diff_density_rms    0.044 
